# Supplementary material for: Analysis of primary care prescription trends in England during the COVID-19 pandemic compared against a predictive model
Source: HighWire-hosted journal article supplement (doi:10.1136/fmch-2021-001143), 2021-08-01
Supplement: fmch-2021-001143supp001_data_supplement.pdf [file fmch-2021-001143supp001_data_supplement.pdf]

**Supplementary Table 1** - overall BNF code and drug prescribing for various months during 2020. Absolute number of prescribed items is reported as  $N_{obs}$ , forecast number of prescribed items and 99% prediction intervals are reported as  $N_{for}$  [99%PI], and per cent difference from prediction is reported as % difference.

| Section/Drug Name                                                          | $N_{obs}$ | $N_{for}$ [99CI]                | % difference |
|----------------------------------------------------------------------------|-----------|---------------------------------|--------------|
| <i>March 2020</i>                                                          |           |                                 |              |
| 301 Bronchodilators                                                        | 3,660,136 | 2,586,351[2,385,115-2,787,586]  | 41.5         |
| Salbutamol                                                                 | 2,778,606 | 1,816,511 [1,664,795-1,968,226] | 53           |
| Tiotropium bromide                                                         | 320,677   | 285,527 [251,335-319,718]       | 12.3         |
| Terbutaline sulphate                                                       | 60,988    | 37,124 [32,206-42,042]          | 64.3         |
| Ipratropium bromide                                                        | 45,147    | 37,064 [30,748-43,380]          | 21.8         |
| 302 Corticosteroids (respiratory)                                          | 2,501,201 | 1,789,455[1,660,007-1,918,903]  | 39.8         |
| Beclometasone dipropionate                                                 | 1,592,567 | 1,143,059 [1,053,132-1,232,985] | 39.3         |
| Fluticasone propionate (Inhalation)                                        | 478,697   | 344,268 [294,753-393,783]       | 39           |
| Budesonide                                                                 | 412,041   | 300,051 [272,192-327,910]       | 37.3         |
| Fluticasone furoate (Inhalation)                                           | 190,119   | 167,943 [157,500-178,386]       | 13.2         |
| 407 Analgesics                                                             | 5,594,383 | 5,119,539[4,684,937-5,554,140]  | 9.3          |
| Paracetamol                                                                | 1,708,852 | 1,404,470 [1,235,864-1,573,075] | 21.7         |
| 1001 Drugs used in rheumatic diseases and gout                             | 1,837,948 | 1,845,392[1,674,029-2,016,754]  | -0.4         |
| Ibuprofen                                                                  | 416,800   | 442,759 [377,190-508,327]       | -5.9         |
| Methotrexate                                                               | 187,380   | 172,841 [159,921-185,761]       | 8.4          |
| Hydroxychloroquine sulfate                                                 | 108,451   | 95,899 [87,361-104,437]         | 13.1         |
| Leflunomide                                                                | 16,342    | 15,216 [13,972-16,460]          | 7.4          |
| 601 Drugs used in diabetes                                                 | 5,297,866 | 4,887,373[4,554,891-5,219,854]  | 8.4          |
| Metformin hydrochloride                                                    | 2,045,234 | 1,920,314 [1,788,117-2,052,510] | 6.5          |
| Glucose blood testing reagents                                             | 624,352   | 559,310 [511,117-607,504]       | 11.6         |
| Gliclazide                                                                 | 582,008   | 550,774 [504,548-597,000]       | 5.7          |
| Insulin aspart                                                             | 212,386   | 167,378 [155,482-179,274]       | 26.9         |
| Ketone blood testing reagents                                              | 34,507    | 24,830 [23,238-26,422]          | 39           |
| Glucose                                                                    | 33,780    | 28,449 [26,296-30,602]          | 18.7         |
| Glucagon                                                                   | 8,297     | 6,493 [5,490-7,497]             | 27.8         |
| 802 Drugs affecting the immune response (malignancy and immunosuppression) | 107,974   | 98,259[90,613-105,904]          | 9.9          |
| Tacrolimus                                                                 | 28,930    | 24,388 [22,060-26,717]          | 18.6         |
| Mycophenolate mofetil                                                      | 18,317    | 16,237 [14,988-17,485]          | 12.8         |
| Ciclosporin                                                                | 5,592     | 4,904 [3,700-6,109]             | 14           |
| Sirolimus                                                                  | 649       | 558 [427-689]                   | 16.2         |
| <i>April 2020</i>                                                          |           |                                 |              |
| 102 Antispasmodics & Other Drugs Altering Gut Motility                     | 389,747   | 384,600[352,525-416,674]        | 1.3          |
| Glycopyrronium bromide                                                     | 52,901    | 45,125 [37,416-52,833]          | 17.2         |
| 402 Drugs used in psychoses and related disorders                          | 1,091,501 | 1,018,306[948,933-1,087,679]    | 7.2          |
| Haloperidol                                                                | 33,612    | 24,630 [19,717-29,542]          | 36.5         |
| Levomepromazine hydrochloride                                              | 16,563    | 8,506 [6,298-10,714]            | 94.7         |
| 408 Antiepileptic drugs                                                    | 2,499,462 | 2,404,322[2,221,327-2,587,318]  | 4            |
| Midazolam hydrochloride                                                    | 45,033    | 25,303 [21,198-29,408]          | 78           |
| 406 Drugs used in nausea and vertigo                                       | 501,384   | 490,706[424,718-556,694]        | 2.2          |

|                                                      |           |                                |       |
|------------------------------------------------------|-----------|--------------------------------|-------|
| Cyclizine lactate                                    | 10,414    | 5,927 [4,154-7,701]            | 75.7  |
| 407 Analgesics                                       | 5,309,715 | 4,991,310[4,551,713-5,430,908] | 6.4   |
| Morphine sulfate                                     | 458,547   | 426,753 [391,634-461,873]      | 7.5   |
| Oxycodone hydrochloride                              | 155,119   | 152,093 [140,335-163,851]      | 2     |
| 901 Anaemias and other blood disorders               | 1,607,183 | 1,619,365[1,500,462-1,738,268] | -0.8  |
| Hydroxocobalamin                                     | 143,925   | 232,277 [210,762-253,791]      | -38   |
| Cyanocobalamin                                       | 123,126   | 84,637 [78,214-91,061]         | 45.5  |
| 1502 Local anaesthesia                               | 50,077    | 110,722[98,072-123,372]        | -54.8 |
| Lidocaine hydrochloride                              | 46,988    | 105,144 [93,053-117,235]       | -55.3 |
| Bupivacaine hydrochloride                            | 215       | 1,603 [1,192-2,015]            | -86.6 |
| <i>May 2020</i>                                      |           |                                |       |
| 603 Corticosteroids (endocrine)                      | 558,839   | 694,073[624,757-763,389]       | -19.5 |
| Prednisolone                                         | 485,855   | 614,566 [543,975-685,157]      | -20.9 |
| Dexamethasone                                        | 132,489   | 169,013 [143,089-194,936]      | -21.6 |
| 409 Drugs used in Parkinsonism and related disorders | 420,231   | 458,067[428,087-488,046]       | -8.3  |
| Co-careldopa (Carbidopalevodopa)                     | 102,262   | 113,824 [106,270-121,378]      | -10.2 |
| Co-beneldopa (Benserazidelevodopa)                   | 81,115    | 88,742 [82,933-94,552]         | -8.6  |
| 411 Dementia                                         | 324,923   | 364,083[334,301-393,866]       | -10.8 |
| Donepezil hydrochloride                              | 164,831   | 183,192 [166,954-199,431]      | -10   |
| Memantine hydrochloride                              | 116,880   | 131,506 [121,570-141,441]      | -11.1 |
| Rivastigmine                                         | 30,721    | 34,684 [31,718-37,651]         | -11.4 |
| Galantamine                                          | 12,491    | 13,361 [11,550-15,172]         | -6.5  |
| 703 Contraceptives                                   | 561,205   | 697,310[638,559-756,061]       | -19.5 |
| Medroxyprogesterone acetate                          | 70,721    | 94,951 [87,016-102,886]        | -25.5 |
| Levonorgestrel                                       | 9,329     | 21,789 [17,472-26,106]         | -57.2 |
| Etonogestrel                                         | 1,868     | 11,718 [9,900-13,537]          | -84.1 |
| 405 Obesity                                          | 22,177    | 29,310[25,435-33,185]          | -24.3 |
| Orlistat                                             | 22,171    | 29,307 [25,431-33,184]         | -24.3 |
