# Supplementary material for: Analysis of primary care prescription trends in England during the COVID-19 pandemic compared against a predictive model
Source: HighWire-hosted journal article supplement (doi:10.1136/fmch-2021-001143), 2021-08-01
Supplement: fmch-2021-001143supp002_data_supplement.pdf [file fmch-2021-001143supp002_data_supplement.pdf]

**Supplementary Table 2** - Overall BNF code and drug prescribing for the month of March 2020. Absolute number of prescribed items is reported as  $N_{obs}$ , forecast number of prescribed items and 99% prediction intervals are reported as  $N_{for}$  [99%PI], and per cent difference from prediction is reported as % difference.

| Section/Drug Name                                           | $N_{obs}$ | $N_{for}$ [99CI]          | % difference |
|-------------------------------------------------------------|-----------|---------------------------|--------------|
| 101 Dyspepsia and Gastro-Oesophageal Reflux Disease         | 378,735   | 353,793[319,589-387,997]  | 7            |
| Alginic acid compound preparations                          | 367,639   | 341,603 [308,265-374,941] | 7.6          |
| Co-magaldrox (Magnesiumaluminium hydroxide)                 | 4,639     | 4,354 [3,295-5,413]       | 6.5          |
| Simeticone                                                  | 1,698     | 1,632 [1,085-2,179]       | 4.1          |
| Magnesium hydroxide                                         | 1,416     | 1,757 [241-3,273]         | -19.4        |
| Aluminium and magnesium and activated simeticone            | 1,104     | 1,151 [712-1,590]         | -4.1         |
| Magnesium oxide                                             | 375       | 348 [261-436]             | 7.7          |
| Compound alginates and proprietary indigestion preparations | 366       | 356 [264-448]             | 2.8          |
| Magnesium trisilicate                                       | 339       | 390 [-90-870]             | -13.1        |
| Aluminium and magnesium and oxetacaine                      | 238       | 243 [169-316]             | -2           |
| Aluminium hydroxide                                         | 34        | -120 [-394-154]           | -128.4       |
| Magnesium carbonate                                         | 34        | 42 [20-65]                | -19.8        |
| Co-simalcite (Simeticonehydrotalcite)                       | 12        | -22 [-171-127]            | -154.2       |
| Gripe mixtures                                              | 1         | 0 [-13-12]                | -304.1       |
| 102 Antispasmodics & Other Drugs Altering Gut Motility      | 404,233   | 398,337[366,738-429,936]  | 1.5          |
| Mebeverine hydrochloride                                    | 183,685   | 178,814 [164,468-193,161] | 2.7          |
| Hyoscine butylbromide                                       | 132,788   | 132,399 [121,477-143,321] | 0.3          |
| Glycopyrronium bromide                                      | 48,724    | 47,384 [40,446-54,321]    | 2.8          |
| Peppermint oil                                              | 44,633    | 45,309 [41,226-49,393]    | -1.5         |
| Alverine citrate                                            | 20,843    | 18,770 [16,630-20,910]    | 11           |
| Mebeverine hydrochloride compound preparations              | 5,954     | 5,732 [4,915-6,550]       | 3.9          |
| Propantheline bromide                                       | 5,646     | 5,322 [4,578-6,065]       | 6.1          |
| Dicycloverine hydrochloride                                 | 2,832     | 2,593 [1,705-3,481]       | 9.2          |
| Dicycloverine hydrochloride compound preparations           | 2,229     | 2,289 [1,766-2,813]       | -2.6         |

|                                                        |           |                                 |        |
|--------------------------------------------------------|-----------|---------------------------------|--------|
| Belladonna alkaloids                                   | 152       | 203 [80-326]                    | -25    |
| Compound antispasmodic preparations                    | 8         | -4 [-33-26]                     | -314.2 |
| Eluxadoline                                            | 2         | 1 [-23-25]                      | 187.4  |
| Alverine citratesimeticone                             | 2         | -15 [-93-63]                    | -113.4 |
| 103 Antisecretory Drugs and Mucosal Protectants        | 6,154,125 | 5,945,499[5,502,525-6,388,474]  | 3.5    |
| Omeprazole                                             | 2,974,743 | 2,735,156 [2,512,509-2,957,803] | 8.8    |
| Lansoprazole                                           | 2,516,486 | 2,295,034 [2,135,229-2,454,838] | 9.6    |
| Ranitidine hydrochloride                               | 287,359   | 563,536 [523,671-603,402]       | -49    |
| Esomeprazole                                           | 199,147   | 180,964 [167,851-194,076]       | 10     |
| Pantoprazole                                           | 125,430   | 112,995 [104,527-121,464]       | 11     |
| Rabeprazole sodium                                     | 32,641    | 28,713 [26,371-31,056]          | 13.7   |
| Cimetidine                                             | 11,973    | 6,504 [3,707-9,300]             | 84.1   |
| Famotidine                                             | 2,995     | 1,530 [970-2,090]               | 95.8   |
| Nizatidine                                             | 1,570     | 2,106 [734-3,478]               | -25.5  |
| Sucralfate                                             | 849       | 1,156 [-317-2,630]              | -26.6  |
| Other test for helicobacter pylori preparations        | 448       | 802 [500-1,104]                 | -44.1  |
| Misoprostol                                            | 379       | 297 [153-441]                   | 27.6   |
| Pirenzepine                                            | 132       | 135 [76-195]                    | -2.3   |
| 104 Acute diarrhoea                                    | 153,196   | 139,601[127,310-151,891]        | 9.7    |
| Loperamide hydrochloride                               | 152,743   | 139,923 [127,602-152,244]       | 9.2    |
| Loperamide hydrochloride and simeticone                | 315       | 322 [263-380]                   | -2.1   |
| Co-phenotrope (Diphenox hydrochlorideatropine sulfate) | 91        | -735 [-1,924-454]               | -112.4 |
| Opium and morphine                                     | 46        | 104 [-25-234]                   | -55.8  |
| Telotristat ethyl                                      | 1         | 0 [0-0]                         | Inf    |
| 105 Chronic bowel disorders                            | 230,898   | 211,766[196,761-226,771]        | 9      |
| Budesonide                                             | 412,041   | 300,051 [272,192-327,910]       | 37.3   |
| Mesalazine (Systemic)                                  | 139,063   | 125,769 [117,160-134,377]       | 10.6   |
| Sulfasalazine                                          | 75,653    | 69,459 [64,276-74,641]          | 8.9    |

|                                         |           |                                |       |
|-----------------------------------------|-----------|--------------------------------|-------|
| Prednisolone sodium phosphate           | 6,181     | 6,571 [5,206-7,936]            | -5.9  |
| Balsalazide sodium                      | 4,276     | 3,847 [3,470-4,223]            | 11.2  |
| Prednisolone sodium metasulphobenzoate  | 1,719     | 1,602 [1,324-1,879]            | 7.3   |
| Olsalazine sodium                       | 1,072     | 1,006 [745-1,267]              | 6.5   |
| Beclometasone dipropionate (Systemic)   | 297       | 249 [172-326]                  | 19.3  |
| 106 Laxatives                           | 1,590,104 | 1,544,082[1,425,692-1,662,472] | 3     |
| Macrogol 3350                           | 561,583   | 532,033 [487,012-577,054]      | 5.6   |
| Senna                                   | 344,260   | 346,757 [299,457-394,058]      | -0.7  |
| Lactulose                               | 225,027   | 215,231 [192,416-238,047]      | 4.6   |
| Docusate sodium                         | 204,516   | 204,233 [191,478-216,988]      | 0.1   |
| Ispaghula husk                          | 96,866    | 89,140 [80,114-98,166]         | 8.7   |
| Bisacodyl                               | 86,238    | 92,179 [60,407-123,950]        | -6.4  |
| Glycerol                                | 17,840    | 18,098 [16,349-19,847]         | -1.4  |
| Sodium picosulfate                      | 15,696    | 14,931 [13,563-16,299]         | 5.1   |
| Prucalopride                            | 11,648    | 11,783 [10,960-12,607]         | -1.1  |
| Sodium citrate (Rectal)                 | 7,144     | 7,125 [6,401-7,849]            | 0.3   |
| Phosphates (Rectal)                     | 5,369     | 5,382 [4,964-5,800]            | -0.2  |
| Sterculia                               | 4,406     | 4,176 [3,654-4,698]            | 5.5   |
| Linaclotide                             | 4,308     | 4,210 [2,355-6,065]            | 2.3   |
| Naloxegol                               | 2,872     | 2,935 [2,703-3,166]            | -2.1  |
| Magnesium hydroxide                     | 1,416     | 1,757 [241-3,273]              | -19.4 |
| Methylcellulose                         | 1,217     | 1,101 [294-1,908]              | 10.5  |
| Bowel cleansing solutions               | 363       | 429 [273-586]                  | -15.4 |
| Co-danthramer (Dantronpoloxamer 188)    | 199       | 179 [-564-922]                 | 11.2  |
| Arachis oil                             | 82        | 76 [37-114]                    | 8.5   |
| Co-danthrusate (Dantrondocusate sodium) | 31        | 150 [-502-802]                 | -79.3 |
| Macrogol 4000                           | 8         | -769 [-1,792-253]              | -101  |
| Castor oil                              | 8         | 3 [-4-10]                      | 172.9 |

|                                             |           |                                |        |
|---------------------------------------------|-----------|--------------------------------|--------|
| Other osmotic laxative preparations         | 7         | 9 [5-13]                       | -21.7  |
| Other stimulant laxative preparations       | 5         | -7 [-38-25]                    | -176.3 |
| Lubiprostone                                | 5         | -80 [-412-252]                 | -106.2 |
| Phosphates                                  | 1         | 4 [-17-26]                     | -76.6  |
| 107 Local Prepn for Anal & Rectal Disorders | 94,066    | 105,560[93,130-117,990]        | -10.9  |
| Prednisolone                                | 763,412   | 641,691 [571,633-711,748]      | 19     |
| Hydrocortisone                              | 416,618   | 457,514 [404,583-510,446]      | -8.9   |
| Glyceryl trinitrate                         | 167,228   | 148,334 [133,954-162,715]      | 12.7   |
| Zinc oxide                                  | 26,666    | 26,914 [21,449-32,380]         | -0.9   |
| Fluocortolone                               | 256       | 658 [-113-1,430]               | -61.1  |
| Hamamelis                                   | 94        | 93 [63-123]                    | 1      |
| Other soothing haemorrhoidal preparations   | 67        | 85 [44-125]                    | -20.9  |
| Phenol                                      | 33        | 38 [4-72]                      | -13.3  |
| 108 Stoma care                              | 41        | 47[-164-258]                   | -12.3  |
|                                             | 41        | 47 [-164-258]                  | -12.3  |
| 109 Drugs affecting intestinal secretions   | 85,960    | 80,694[74,248-87,140]          | 6.5    |
| Pancreatin                                  | 55,669    | 53,267 [48,205-58,328]         | 4.5    |
| Ursodeoxycholic acid                        | 30,280    | 27,589 [25,802-29,375]         | 9.8    |
| Other preparations for biliary disorders    | 7         | 7 [-3-17]                      | 0      |
| Chenodeoxycholic acid                       | 2         | 0 [-4-5]                       | 383.6  |
| Other pancreatin preparations               | 2         | 0 [-3-3]                       | 802.3  |
| 201 Positive inotropic drugs                | 245,716   | 228,747[207,710-249,783]       | 7.4    |
|                                             | 245,716   | 228,747 [207,711-249,783]      | 7.4    |
| 202 Diuretics                               | 2,745,021 | 2,542,723[2,341,065-2,744,380] | 8      |
| Furosemide                                  | 991,705   | 953,698 [878,655-1,028,740]    | 4      |
| Bendroflumethiazide                         | 762,076   | 683,101 [593,741-772,462]      | 11.6   |
| Indapamide                                  | 457,596   | 422,668 [389,209-456,127]      | 8.3    |
| Spironolactone                              | 249,474   | 235,241 [218,205-252,277]      | 6.1    |

|                                                           |           |                                |        |
|-----------------------------------------------------------|-----------|--------------------------------|--------|
| Bumetanide                                                | 154,236   | 146,118 [135,365-156,870]      | 5.6    |
| Eplerenone                                                | 77,371    | 73,050 [68,337-77,762]         | 5.9    |
| Co-amilofruse (Amiloride hydrochloridefrusemide)          | 25,590    | 23,554 [18,377-28,732]         | 8.6    |
| Amiloride hydrochloride                                   | 12,788    | 11,952 [9,308-14,596]          | 7      |
| Co-amilozide (Amiloride hydrochloridehydrochlorothiazide) | 8,276     | 6,986 [5,197-8,775]            | 18.5   |
| Torasemide                                                | 1,444     | 1,208 [1,011-1,405]            | 19.6   |
| Metolazone                                                | 1,408     | 1,575 [1,254-1,896]            | -10.6  |
| Chlortalidone                                             | 1,221     | 1,198 [1,023-1,372]            | 2      |
| Amiloride hydrochloride with loop diuretics               | 493       | 436 [293-579]                  | 13     |
| Xipamide                                                  | 326       | 294 [216-372]                  | 10.8   |
| Spironolactone with loop diuretics                        | 309       | 291 [223-360]                  | 6      |
| Triamterene with loop diuretics                           | 276       | 269 [180-357]                  | 2.7    |
| Chlorothiazide                                            | 236       | 240 [177-303]                  | -1.6   |
| Hydrochlorothiazide                                       | 80        | 113 [65-160]                   | -29    |
| Co-flumactone (Hydroflumethiazidespironolactone)          | 68        | 24 [-18-65]                    | 189    |
| Triamterene with thiazides                                | 45        | 68 [36-99]                     | -33.4  |
| Triamterene                                               | 2         | -1 [-51-49]                    | -247.1 |
| Co-triamterzide(Triamterenehydrochlorothiazide)           | 1         | 2 [-45-48]                     | -37.3  |
| 203 Anti-arrhythmic drugs                                 | 85,797    | 78,610[72,121-85,100]          | 9.1    |
| Flecainide acetate                                        | 40,332    | 36,387 [33,633-39,141]         | 10.8   |
| Amiodarone hydrochloride                                  | 39,933    | 37,640 [33,895-41,384]         | 6.1    |
| Dronedarone hydrochloride                                 | 1,970     | 1,858 [1,522-2,194]            | 6      |
| Propafenone hydrochloride                                 | 1,690     | 1,540 [1,369-1,712]            | 9.7    |
| Disopyramide                                              | 1,096     | 1,035 [810-1,260]              | 5.9    |
| Disopyramide phosphate                                    | 624       | 589 [482-696]                  | 6      |
| Mexiletine hydrochloride                                  | 147       | 144 [25-262]                   | 2.3    |
| Quinidine sulfate                                         | 5         | 13 [0-26]                      | -61.4  |
| 204 Beta-adrenoceptor blocking drugs                      | 3,576,428 | 3,350,923[3,127,065-3,574,781] | 6.7    |

|                                       |           |                                 |        |
|---------------------------------------|-----------|---------------------------------|--------|
| Bisoprolol fumarate                   | 2,278,919 | 2,160,016 [2,009,288-2,310,744] | 5.5    |
| Atenolol                              | 550,405   | 501,933 [442,941-560,925]       | 9.7    |
| Propranolol hydrochloride             | 540,613   | 502,976 [469,917-536,035]       | 7.5    |
| Carvedilol                            | 52,521    | 49,745 [46,543-52,947]          | 5.6    |
| Nebivolol                             | 52,368    | 48,808 [45,440-52,175]          | 7.3    |
| Sotalol hydrochloride                 | 41,426    | 37,322 [32,904-41,739]          | 11     |
| Metoprolol tartrate                   | 30,398    | 22,334 [10,044-34,624]          | 36.1   |
| Co-tenidone (Atenololchlortalidone)   | 12,318    | 11,247 [8,999-13,495]           | 9.5    |
| Labetalol hydrochloride               | 9,756     | 7,077 [5,260-8,893]             | 37.9   |
| Celiprolol hydrochloride              | 2,855     | 2,605 [1,509-3,700]             | 9.6    |
| Nadolol                               | 1,402     | 1,253 [637-1,868]               | 11.9   |
| Atenolol with calcium channel blocker | 1,100     | 955 [619-1,292]                 | 15.2   |
| Acebutolol hydrochloride              | 815       | 752 [592-911]                   | 8.4    |
| Timolol with diuretic                 | 19        | 25 [-57-107]                    | -25.2  |
| Pindolol                              | 6         | -81 [-221-58]                   | -107.4 |
| 205 Hypertension and heart failure    | 6,634,455 | 6,109,534[5,702,058-6,517,010]  | 8.6    |
| Ramipril                              | 2,688,193 | 2,494,294 [2,329,531-2,659,057] | 7.8    |
| Losartan potassium                    | 960,833   | 889,054 [831,824-946,284]       | 8.1    |
| Lisinopril                            | 765,004   | 706,358 [652,986-759,731]       | 8.3    |
| Candesartan cilexetil                 | 659,583   | 606,350 [566,163-646,537]       | 8.8    |
| Doxazosin mesilate                    | 604,683   | 563,266 [524,970-601,561]       | 7.4    |
| Perindopril erbumine                  | 385,395   | 353,456 [325,983-380,928]       | 9      |
| Irbesartan                            | 160,992   | 147,811 [136,150-159,471]       | 8.9    |
| Enalapril maleate                     | 137,176   | 125,031 [112,852-137,211]       | 9.7    |
| Olmesartan medoxomil                  | 39,227    | 37,241 [32,761-41,722]          | 5.3    |
| Valsartan                             | 33,384    | 27,139 [15,355-38,924]          | 23     |
| Clonidine hydrochloride               | 32,833    | 35,822 [32,575-39,068]          | -8.3   |
| Moxonidine                            | 32,691    | 30,597 [27,899-33,295]          | 6.8    |

|                                                   |        |                        |       |
|---------------------------------------------------|--------|------------------------|-------|
| Telmisartan                                       | 29,275 | 25,919 [23,583-28,255] | 12.9  |
| Sacubitrilvalsartan                               | 26,576 | 25,094 [23,936-26,251] | 5.9   |
| Losartan potassium with diuretic                  | 16,221 | 13,438 [10,753-16,123] | 20.7  |
| Hydralazine hydrochloride                         | 16,140 | 15,440 [14,407-16,472] | 4.5   |
| Lisinopril with diuretic                          | 9,239  | 6,834 [3,877-9,791]    | 35.2  |
| Irbesartan with diuretic                          | 6,929  | 5,947 [3,629-8,265]    | 16.5  |
| Methyldopa                                        | 6,128  | 5,841 [5,168-6,513]    | 4.9   |
| Trandolapril                                      | 6,038  | 4,971 [3,310-6,631]    | 21.5  |
| Captopril                                         | 5,744  | 5,219 [4,109-6,328]    | 10.1  |
| Valsartan with diuretic                           | 5,035  | 4,317 [3,392-5,242]    | 16.6  |
| Eprosartan                                        | 4,635  | 3,985 [2,844-5,126]    | 16.3  |
| Terazosin hydrochloride                           | 3,756  | 4,208 [3,168-5,247]    | -10.7 |
| Perindopril arginine with diuretic                | 3,638  | 3,235 [2,693-3,777]    | 12.4  |
| Telmisartan with diuretic                         | 3,017  | 2,631 [2,097-3,164]    | 14.7  |
| Prazosin hydrochloride                            | 2,932  | 2,926 [2,431-3,422]    | 0.2   |
| Perindopril arginine                              | 2,649  | 2,353 [1,794-2,912]    | 12.6  |
| Minoxidil                                         | 2,051  | 2,026 [1,818-2,235]    | 1.2   |
| Olmесartan medoxomilamlodipine                    | 1,627  | 1,501 [1,355-1,646]    | 8.4   |
| Aliskiren                                         | 1,539  | 1,477 [1,148-1,807]    | 4.2   |
| Olmесartan medoxomilhydrochlorothiazide           | 1,405  | 1,096 [859-1,333]      | 28.2  |
| Enalapril maleate with diuretic                   | 1,152  | 1,052 [810-1,294]      | 9.5   |
| Olmесartan medoxomilamlodipinehydrochlorothiazide | 922    | 849 [664-1,034]        | 8.5   |
| Imidapril hydrochloride                           | 604    | 550 [388-712]          | 9.8   |
| Ramipril with calcium channel blocker             | 581    | 565 [464-666]          | 2.8   |
| Quinapril hydrochloride                           | 568    | 200 [-4,288-4,688]     | 183.8 |
| Fosinopril sodium                                 | 558    | 417 [-328-1,162]       | 33.7  |
| Perindopril with calcium channel blocker          | 271    | 327 [266-389]          | -17.2 |
| Sildenafil(Vasodilator Antihypertensive)          | 268    | 230 [184-276]          | 16.5  |

|                                              |           |                                 |        |
|----------------------------------------------|-----------|---------------------------------|--------|
| Azilsartan medoxomil                         | 78        | 48 [32-64]                      | 64     |
| Phenoxybenzamine hydrochloride               | 77        | 102 [41-164]                    | -24.8  |
| Quinapril hydrochloride with diuretic        | 22        | 70 [8-133]                      | -68.7  |
| Bosentan                                     | 5         | 8 [-4-19]                       | -34.2  |
| Perindopril erbumine with diuretic           | 2         | -2 [-9-5]                       | -197.3 |
| Tadalafil (Vasodilator Antihypertensive)     | 2         | 0 [-4-4]                        | 484.3  |
| Ambrisentan                                  | 2         | 1 [-5-6]                        | 151.3  |
| Macitentan                                   | 1         | 1 [-1-4]                        | -20.3  |
| 206 Nit,Calc Block & Other Antianginal Drugs | 4,716,636 | 4,324,283[4,041,771-4,606,796]  | 9.1    |
| Amlodipine                                   | 2,866,726 | 2,637,528 [2,473,099-2,801,957] | 8.7    |
| Isosorbide mononitrate                       | 399,750   | 375,652 [347,038-404,265]       | 6.4    |
| Felodipine                                   | 339,000   | 309,966 [283,680-336,253]       | 9.4    |
| Lercanidipine hydrochloride                  | 254,229   | 232,749 [217,412-248,087]       | 9.2    |
| Diltiazem hydrochloride                      | 227,324   | 212,080 [194,553-229,606]       | 7.2    |
| Nifedipine                                   | 124,963   | 123,419 [108,057-138,781]       | 1.3    |
| Nicorandil                                   | 117,636   | 110,996 [99,473-122,518]        | 6      |
| Verapamil hydrochloride                      | 57,267    | 52,252 [47,202-57,302]          | 9.6    |
| Lacidipine                                   | 53,176    | 48,365 [44,918-51,812]          | 9.9    |
| Ranolazine                                   | 47,281    | 44,266 [41,493-47,039]          | 6.8    |
| Ivabradine                                   | 44,580    | 43,057 [40,035-46,079]          | 3.5    |
| Naftidrofuryl oxalate                        | 10,922    | 10,307 [8,498-12,116]           | 6      |
| Isosorbide dinitrate                         | 5,825     | 5,670 [4,808-6,532]             | 2.7    |
| Valsartanamlodipine                          | 2,160     | 2,024 [1,802-2,246]             | 6.7    |
| Cilostazol                                   | 1,676     | 1,720 [1,423-2,016]             | -2.5   |
| Pentoxifylline                               | 1,610     | 1,685 [1,297-2,072]             | -4.4   |
| Nicardipine hydrochloride                    | 1,321     | 1,100 [693-1,508]               | 20.1   |
| Rutosides                                    | 841       | 776 [468-1,085]                 | 8.3    |
| Moxisylyte hydrochloride                     | 94        | 121 [76-166]                    | -22.2  |



|                                  |           |                                 |       |
|----------------------------------|-----------|---------------------------------|-------|
| Trimetazidine hydrochloride      | 69        | 50 [23-77]                      | 37.7  |
| Nimodipine                       | 57        | 39 [11-68]                      | 45.1  |
| Acetyl-L-carnitine               | 1         | 2 [-2-6]                        | -50.4 |
| 207 Sympathomimetics             | 11,329    | 11,282[10,365-12,198]           | 0.4   |
| Midodrine hydrochloride          | 11,325    | 11,252 [10,347-12,156]          | 0.7   |
| 208 Anticoagulants and protamine | 1,751,258 | 1,620,364[1,495,912-1,744,815]  | 8.1   |
| Warfarin sodium                  | 602,639   | 528,463 [447,784-609,142]       | 14    |
| Apixaban                         | 578,725   | 561,272 [532,103-590,440]       | 3.1   |
| Rivaroxaban                      | 391,738   | 397,034 [353,828-440,239]       | -1.3  |
| Edoxaban                         | 109,449   | 106,023 [98,017-114,029]        | 3.2   |
| Dabigatran etexilate             | 38,926    | 39,250 [33,831-44,670]          | -0.8  |
| Enoxaparin                       | 11,478    | 12,279 [10,734-13,825]          | -6.5  |
| Dalteparin sodium                | 7,831     | 7,894 [5,883-9,906]             | -0.8  |
| Tinzaparin sodium                | 5,078     | 5,678 [4,560-6,795]             | -10.6 |
| INR blood testing reagents       | 2,609     | 2,293 [1,752-2,834]             | 13.8  |
| Acenocoumarol                    | 1,929     | 1,804 [1,524-2,085]             | 6.9   |
| Heparin flushes                  | 573       | 539 [368-710]                   | 6.3   |
| Fondaparinux sodium              | 125       | 151 [114-189]                   | -17.4 |
| Pentosan polysulfate sodium      | 88        | 66 [34-97]                      | 33.9  |
| Phenindione                      | 44        | 54 [7-101]                      | -18.3 |
| Heparin sodium                   | 21        | 15 [-3-32]                      | 42.2  |
| Heparin calcium                  | 5         | 3 [-6-13]                       | 45.3  |
| 209 Antiplatelet drugs           | 2,924,782 | 2,674,206[2,457,446-2,890,966]  | 9.4   |
| Aspirin                          | 1,933,677 | 1,748,766 [1,570,022-1,927,510] | 10.6  |
| Clopidogrel                      | 915,964   | 874,613 [810,951-938,274]       | 4.7   |
| Ticagrelor                       | 53,173    | 52,206 [46,939-57,473]          | 1.9   |
| Dipyridamole                     | 20,828    | 16,791 [6,238-27,345]           | 24    |
| Prasugrel                        | 6,110     | 4,955 [4,238-5,672]             | 23.3  |

|                                             |           |                                 |       |
|---------------------------------------------|-----------|---------------------------------|-------|
| Dipyridamole and aspirin                    | 83        | -832 [-5,512-3,849]             | -110  |
| Ticlopidine hydrochloride                   | 1         | 0 [-3-3]                        | 973.5 |
| 211 Antifibrinolytic drugs and haemostatics | 37,453    | 38,566[34,997-42,135]           | -2.9  |
| Tranexamic acid                             | 37,453    | 38,544 [34,941-42,146]          | -2.8  |
| 212 Lipid-regulating drugs                  | 6,973,832 | 6,408,379[5,991,251-6,825,506]  | 8.8   |
| Atorvastatin                                | 4,383,530 | 4,138,129 [3,852,835-4,423,423] | 5.9   |
| Simvastatin                                 | 1,807,400 | 1,633,103 [1,401,139-1,865,067] | 10.7  |
| Rosuvastatin calcium                        | 255,028   | 233,371 [219,362-247,380]       | 9.3   |
| Pravastatin sodium                          | 223,662   | 205,892 [187,894-223,889]       | 8.6   |
| Ezetimibe                                   | 173,063   | 159,764 [148,242-171,287]       | 8.3   |
| Fenofibrate                                 | 49,844    | 45,726 [42,220-49,231]          | 9     |
| Bezafibrate                                 | 35,073    | 32,625 [29,315-35,934]          | 7.5   |
| Colesevelam hydrochloride                   | 13,362    | 12,245 [10,257-14,232]          | 9.1   |
| Colestyramine                               | 9,917     | 12,454 [10,478-14,430]          | -20.4 |
| Fluvastatin sodium                          | 9,592     | 9,252 [8,061-10,444]            | 3.7   |
| Omega-3-acid ethyl esters                   | 8,012     | 6,270 [1,691-10,849]            | 27.8  |
| Ciprofibrate                                | 2,022     | 1,874 [1,410-2,338]             | 7.9   |
| Simvastatin and ezetimibe                   | 1,522     | 1,266 [794-1,737]               | 20.3  |
| Colestipol hydrochloride                    | 894       | 723 [118-1,327]                 | 23.7  |
| Gemfibrozil                                 | 768       | 703 [579-827]                   | 9.3   |
| Acipimox                                    | 134       | 132 [80-185]                    | 1.2   |
| Alirocumab                                  | 4         | 4 [-3-11]                       | -0.2  |
| Evolocumab                                  | 3         | 5 [1-8]                         | -35.5 |
| Fenofibratesimvastatin                      | 2         | 3 [-22-27]                      | -26   |
| 301 Bronchodilators                         | 3,660,136 | 2,586,351[2,385,115-2,787,586]  | 41.5  |
| Salbutamol                                  | 2,778,606 | 1,816,511 [1,664,795-1,968,226] | 53    |
| Tiotropium bromide                          | 320,677   | 285,527 [251,335-319,718]       | 12.3  |
| Beclometdipropformoterolglycopyrronium      | 102,319   | 96,856 [90,129-103,584]         | 5.6   |

|                                              |           |                                 |        |
|----------------------------------------------|-----------|---------------------------------|--------|
| Umeclidinium bromidevilanterol               | 74,379    | 68,109 [64,974-71,244]          | 9.2    |
| Terbutaline sulphate                         | 60,988    | 37,124 [32,206-42,042]          | 64.3   |
| Umeclidinium bromide                         | 52,885    | 50,888 [40,596-61,180]          | 3.9    |
| Glycopyrronium bromide                       | 48,724    | 47,384 [40,446-54,321]          | 2.8    |
| Ipratropium bromide                          | 45,147    | 37,064 [30,748-43,380]          | 21.8   |
| Theophylline                                 | 39,675    | 37,795 [34,645-40,946]          | 5      |
| Salmeterol                                   | 30,309    | 23,721 [17,590-29,852]          | 27.8   |
| Tiotropium bromideolodaterol                 | 26,868    | 24,686 [23,485-25,888]          | 8.8    |
| Indacaterolglycopyrronium                    | 25,664    | 26,339 [23,654-29,023]          | -2.6   |
| Acclidinium bromide                          | 24,029    | 21,727 [15,789-27,665]          | 10.6   |
| Aminophylline hydrate                        | 22,573    | 21,101 [18,978-23,224]          | 7      |
| Acclidinium bromideformoterol                | 17,580    | 16,412 [13,939-18,886]          | 7.1    |
| Formoterol fumarate                          | 11,430    | 9,918 [8,706-11,131]            | 15.2   |
| Indacaterol maleate                          | 1,556     | 1,405 [1,034-1,776]             | 10.7   |
| Ephedrine hydrochloride                      | 501       | 434 [224-644]                   | 15.4   |
| Bambuterol hydrochloride                     | 303       | 283 [192-374]                   | 7.1    |
| Olodaterol                                   | 269       | 254 [177-330]                   | 6.1    |
| Aminophylline                                | 8         | 0 [-20-21]                      | 7540.8 |
| 302 Corticosteroids (respiratory)            | 2,501,201 | 1,789,455[1,660,007-1,918,903]  | 39.8   |
| Beclometasone dipropionate                   | 1,592,567 | 1,143,059 [1,053,132-1,232,985] | 39.3   |
| Fluticasone propionate (Inhalation)          | 478,697   | 344,268 [294,753-393,783]       | 39     |
| Budesonide                                   | 412,041   | 300,051 [272,192-327,910]       | 37.3   |
| Fluticasone furoate (Inhalation)             | 190,119   | 167,943 [157,500-178,386]       | 13.2   |
| Ciclesonide                                  | 5,587     | 3,905 [3,373-4,438]             | 43.1   |
| 303 Cromoglycate,Rel,Leukotriene Antagonists | 327,597   | 283,678[266,406-300,949]        | 15.5   |
| Montelukast                                  | 326,191   | 285,478 [268,116-302,841]       | 14.3   |
| Roflumilast                                  | 559       | 646 [566-725]                   | -13.4  |
| Zafirlukast                                  | 20        | -410 [-2,283-1,463]             | -104.9 |

|                                             |           |                              |        |
|---------------------------------------------|-----------|------------------------------|--------|
| 304 Antihist, Hyposensit & Allergic Emergen | 1,136,413 | 1,063,873[897,513-1,230,232] | 6.8    |
| Cetirizine hydrochloride                    | 364,226   | 319,537 [243,343-395,731]    | 14     |
| Fexofenadine hydrochloride                  | 315,218   | 289,769 [249,363-330,176]    | 8.8    |
| Loratadine                                  | 148,108   | 130,603 [96,186-165,020]     | 13.4   |
| Promethazine hydrochloride                  | 126,265   | 122,129 [112,833-131,425]    | 3.4    |
| Chlorphenamine maleate                      | 75,885    | 73,895 [56,701-91,089]       | 2.7    |
| Adrenaline                                  | 35,998    | 32,797 [24,703-40,891]       | 9.8    |
| Hydroxyzine hydrochloride                   | 33,920    | 32,675 [26,193-39,156]       | 3.8    |
| Desloratadine                               | 18,296    | 15,652 [12,090-19,215]       | 16.9   |
| Levocetirizine                              | 5,565     | 4,255 [1,531-6,979]          | 30.8   |
| Acrivastine                                 | 4,291     | 3,575 [2,509-4,641]          | 20     |
| Alimemazine tartrate                        | 2,607     | 2,154 [1,145-3,163]          | 21     |
| Diphenhydramine hydrochloride               | 2,507     | 2,589 [1,961-3,217]          | -3.2   |
| Mizolastine                                 | 2,141     | 1,831 [1,426-2,237]          | 16.9   |
| Ketotifen fumarate                          | 1,463     | 1,578 [1,141-2,016]          | -7.3   |
| Clemastine fumarate                         | 421       | 351 [279-423]                | 20     |
| Cyproheptadine hydrochloride                | 236       | 263 [179-348]                | -10.4  |
| Timothy grass pollen allergen extract       | 187       | 178 [134-222]                | 4.9    |
| Rupatadine fumarate                         | 164       | 139 [-208-486]               | 17.9   |
| Bilastine                                   | 113       | 124 [64-184]                 | -9.1   |
| C1-Esterase inhibitor                       | 1         | 6 [-7-20]                    | -83.6  |
| Brompheniramine maleate                     | 1         | 2 [-2-6]                     | -39.1  |
| 307 Mucolytics                              | 261,833   | 243,584[227,161-260,006]     | 7.5    |
| Carbocisteine                               | 255,321   | 240,612 [224,265-256,958]    | 6.1    |
| Acetylcysteine                              | 7,488     | 6,593 [5,511-7,676]          | 13.6   |
| Dornase alfa                                | 943       | 694 [527-861]                | 35.9   |
| Erdosteine                                  | 820       | 829 [614-1,044]              | -1     |
| Mannitol                                    | 1         | 0 [-4-4]                     | 1516.4 |

|                                                   |           |                                |        |
|---------------------------------------------------|-----------|--------------------------------|--------|
| 308 Aromatic inhalations                          | 84        | 285[35-535]                    | -70.5  |
| Menthol                                           | 9,532     | 10,165 [9,262-11,069]          | -6.2   |
| Benzoin                                           | 7         | 8 [-5-20]                      | -8.9   |
| Other aromatic inhalation preparations            | 1         | -1 [-11-8]                     | -173.4 |
| 309 Cough preparations                            | 18,494    | 21,131[-4,142-46,404]          | -12.5  |
| Codeine phosphate                                 | 442,396   | 434,482 [399,963-469,001]      | 1.8    |
| Simple                                            | 6,257     | 6,432 [-6,572-19,435]          | -2.7   |
| Pholcodine                                        | 3,954     | 4,791 [-3,219-12,801]          | -17.5  |
| Guaifenesin                                       | 108       | 169 [51-287]                   | -36.1  |
| Dextromethorphan hydrobromide                     | 77        | 72 [9-135]                     | 7.1    |
| Other expectorantand demulcent cough preparations | 7         | 7 [-9-23]                      | -4.9   |
| Squill                                            | 6         | 16 [-32-65]                    | -63    |
| Dextromethorphan hydrobrom compound preparations  | 4         | 12 [-7-30]                     | -65.3  |
| 310 Systemic nasal decongestants                  | 2,677     | 2,928[-441-6,297]              | -8.6   |
| Pseudoephedrine hydrochloride                     | 2,624     | 2,877 [-484-6,239]             | -8.8   |
| 401 Hypnotics and anxiolytics                     | 1,210,237 | 1,182,593[1,089,730-1,275,456] | 2.3    |
| Zopiclone                                         | 425,028   | 419,718 [384,945-454,491]      | 1.3    |
| Diazepam                                          | 401,538   | 403,598 [370,881-436,314]      | -0.5   |
| Melatonin                                         | 103,245   | 97,684 [91,528-103,839]        | 5.7    |
| Lorazepam                                         | 92,154    | 88,715 [81,709-95,722]         | 3.9    |
| Temazepam                                         | 71,393    | 70,704 [54,795-86,613]         | 1      |
| Zolpidem tartrate                                 | 52,419    | 51,699 [47,211-56,186]         | 1.4    |
| Nitrazepam                                        | 33,710    | 31,858 [26,721-36,995]         | 5.8    |
| Buspirone hydrochloride                           | 15,929    | 15,365 [14,291-16,439]         | 3.7    |
| Oxazepam                                          | 6,044     | 5,767 [5,036-6,498]            | 4.8    |
| Chlordiazepoxide hydrochloride                    | 3,637     | 2,686 [596-4,776]              | 35.4   |
| Lormetazepam                                      | 1,406     | 1,641 [1,340-1,942]            | -14.3  |
| Loprazolam mesilate                               | 1,398     | 537 [-362-1,436]               | 160.1  |

|                                                  |           |                              |       |
|--------------------------------------------------|-----------|------------------------------|-------|
| Chloral hydrate                                  | 1,115     | 1,027 [915-1,139]            | 8.5   |
| Clomethiazole                                    | 805       | 503 [111-895]                | 59.9  |
| Sodium oxybate                                   | 107       | 107 [81-133]                 | 0.1   |
| Amobarbital sodium                               | 81        | 86 [41-132]                  | -6.2  |
| Secobarbital sodium                              | 77        | 90 [36-145]                  | -14.8 |
| Cloral betaine                                   | 55        | 81 [-280-443]                | -32.4 |
| Meprobamate                                      | 52        | 28 [-13-68]                  | 87.3  |
| Clomethiazole edisilate                          | 22        | 138 [76-200]                 | -84.1 |
| Butobarbital                                     | 21        | 25 [-5-55]                   | -16.5 |
| Alprazolam                                       | 1         | 1 [-2-3]                     | 31    |
| 402 Drugs used in psychoses and related disorder | 1,050,109 | 1,033,829[964,597-1,103,060] | 1.6   |
| Quetiapine                                       | 326,617   | 317,516 [296,791-338,241]    | 2.9   |
| Olanzapine                                       | 207,849   | 206,638 [191,672-221,603]    | 0.6   |
| Risperidone                                      | 144,773   | 143,857 [133,219-154,496]    | 0.6   |
| Aripiprazole                                     | 107,861   | 106,398 [99,884-112,911]     | 1.4   |
| Lithium carbonate                                | 73,891    | 71,078 [66,178-75,978]       | 4     |
| Valproic acid                                    | 47,444    | 49,217 [44,517-53,917]       | -3.6  |
| Amisulpride                                      | 33,154    | 32,834 [30,431-35,236]       | 1     |
| Haloperidol                                      | 27,517    | 25,612 [20,979-30,245]       | 7.4   |
| Chlorpromazine hydrochloride                     | 20,398    | 19,851 [17,612-22,090]       | 2.8   |
| Promazine hydrochloride                          | 10,177    | 10,066 [8,807-11,325]        | 1.1   |
| Levomepromazine hydrochloride                    | 9,797     | 9,208 [7,159-11,257]         | 6.4   |
| Sulpiride                                        | 9,394     | 10,328 [9,259-11,397]        | -9    |
| Zuclopenthixol hydrochloride                     | 6,939     | 6,939 [6,372-7,506]          | 0     |
| Pericyazine                                      | 5,205     | 4,905 [3,983-5,826]          | 6.1   |
| Flupentixol decanoate                            | 3,545     | 3,861 [3,514-4,207]          | -8.2  |
| Trifluoperazine                                  | 3,037     | 2,705 [1,853-3,556]          | 12.3  |
| Levomepromazine maleate                          | 3,015     | 3,042 [2,358-3,726]          | -0.9  |

|                             |           |                                 |       |
|-----------------------------|-----------|---------------------------------|-------|
| Zuclopenthixol decanoate    | 2,458     | 2,503 [2,229-2,777]             | -1.8  |
| Lurasidone                  | 1,818     | 1,643 [1,447-1,838]             | 10.7  |
| Paliperidone                | 1,122     | 1,226 [1,048-1,404]             | -8.5  |
| Haloperidol decanoate       | 688       | 742 [560-924]                   | -7.3  |
| Lithium citrate             | 608       | 609 [517-702]                   | -0.2  |
| Benperidol                  | 372       | 363 [306-421]                   | 2.4   |
| Pimozide                    | 338       | 296 [191-400]                   | 14.3  |
| Clozapine                   | 201       | 214 [143-285]                   | -6    |
| Fluphenazine decanoate      | 154       | 186 [-69-440]                   | -17.1 |
| Asenapine                   | 80        | 77 [30-123]                     | 4.5   |
| Cariprazine                 | 53        | 33 [21-45]                      | 60.5  |
| Perphenazine                | 25        | 21 [-5-47]                      | 18.3  |
| Thioridazine                | 23        | 19 [-25-62]                     | 24.1  |
| Olanzapine embonate         | 12        | 11 [2-20]                       | 7.3   |
| Fluphenazine hydrochloride  | 6         | 8 [-2-17]                       | -23.2 |
| Zuclopenthixol acetate      | 3         | 6 [-11-24]                      | -51.3 |
| 403 Antidepressant drugs    | 6,799,266 | 6,490,658[6,060,535-6,920,780]  | 4.8   |
| Sertraline hydrochloride    | 1,588,610 | 1,525,767 [1,428,407-1,623,127] | 4.1   |
| Citalopram hydrobromide     | 1,254,104 | 1,206,310 [1,110,681-1,301,939] | 4     |
| Amitriptyline hydrochloride | 1,253,408 | 1,208,411 [1,123,436-1,293,387] | 3.7   |
| Mirtazapine                 | 878,321   | 854,282 [799,154-909,410]       | 2.8   |
| Fluoxetine hydrochloride    | 622,485   | 588,732 [543,624-633,841]       | 5.7   |
| Venlafaxine                 | 424,103   | 404,769 [378,666-430,873]       | 4.8   |
| Duloxetine hydrochloride    | 270,985   | 260,398 [244,416-276,380]       | 4.1   |
| Escitalopram                | 120,249   | 113,518 [106,790-120,246]       | 5.9   |
| Paroxetine hydrochloride    | 116,444   | 109,475 [101,208-117,743]       | 6.4   |
| Trazodone hydrochloride     | 100,755   | 99,275 [92,066-106,484]         | 1.5   |
| Nortriptyline               | 60,487    | 58,759 [54,242-63,277]          | 2.9   |

|                                            |         |                          |       |
|--------------------------------------------|---------|--------------------------|-------|
| Dosulepin hydrochloride                    | 45,348  | 41,185 [31,847-50,523]   | 10.1  |
| Clomipramine hydrochloride                 | 20,111  | 18,421 [14,879-21,963]   | 9.2   |
| Vortioxetine                               | 14,439  | 13,542 [12,621-14,464]   | 6.6   |
| Lofepramine hydrochloride                  | 14,355  | 12,938 [11,173-14,703]   | 11    |
| Flupentixol hydrochloride                  | 14,223  | 13,622 [12,413-14,831]   | 4.4   |
| Imipramine hydrochloride                   | 12,200  | 12,101 [10,535-13,668]   | 0.8   |
| Citalopram hydrochloride                   | 5,797   | 5,843 [5,227-6,459]      | -0.8  |
| Trimipramine maleate                       | 2,166   | 1,918 [1,291-2,545]      | 12.9  |
| Reboxetine                                 | 2,005   | 1,918 [1,627-2,209]      | 4.5   |
| Doxepin                                    | 1,947   | 1,851 [1,527-2,174]      | 5.2   |
| Fluvoxamine maleate                        | 1,933   | 1,924 [1,556-2,292]      | 0.5   |
| Agomelatine                                | 1,803   | 1,688 [1,472-1,903]      | 6.8   |
| Moclobemide                                | 757     | 1,157 [910-1,403]        | -34.6 |
| Phenelzine sulfate                         | 603     | 617 [364-871]            | -2.3  |
| Tranlycypromine sulfate                    | 506     | 547 [441-652]            | -7.4  |
| Isocarboxazid                              | 149     | 158 [116-200]            | -5.8  |
| Tryptophan                                 | 78      | 91 [42-140]              | -13.9 |
| Mianserin hydrochloride                    | 26      | 172 [73-272]             | -84.9 |
| Nefazodone hydrochloride                   | 5       | 9 [-2-21]                | -47   |
| Oxatriptan                                 | 4       | 10 [2-18]                | -60.4 |
| 404 CNS stimulants and drugs used for ADHD | 147,963 | 136,954[128,083-145,825] | 8     |
| Methylphenidate hydrochloride              | 104,614 | 98,542 [91,858-105,225]  | 6.2   |
| Lisdexamfetamine dimesylate                | 17,650  | 16,593 [15,456-17,730]   | 6.4   |
| Atomoxetine hydrochloride                  | 11,259  | 10,685 [9,845-11,525]    | 5.4   |
| Modafinil                                  | 7,326   | 6,968 [6,471-7,464]      | 5.1   |
| Dexamfetamine sulfate                      | 4,097   | 4,014 [3,709-4,318]      | 2.1   |
| Guanfacine                                 | 2,987   | 2,555 [2,386-2,724]      | 16.9  |
| Pitolisant hydrochloride                   | 21      | 24 [16-32]               | -13.9 |



|                                              |           |                                 |       |
|----------------------------------------------|-----------|---------------------------------|-------|
| Caffeine                                     | 5         | 4 [-1-10]                       | 11.8  |
| Caffeine citrate                             | 4         | 3 [-5-10]                       | 55.7  |
| 405 Obesity                                  | 27,273    | 28,247[24,471-32,023]           | -3.4  |
| Orlistat                                     | 27,267    | 28,244 [24,467-32,021]          | -3.5  |
| Naltrexonebupropion                          | 6         | 3 [-1-7]                        | 97.4  |
| 406 Drugs used in nausea and vertigo         | 505,140   | 512,610[449,799-575,422]        | -1.5  |
| Betahistine hydrochloride                    | 141,036   | 137,365 [126,522-148,208]       | 2.7   |
| Prochlorperazine maleate                     | 117,910   | 130,681 [117,838-143,523]       | -9.8  |
| Cyclizine hydrochloride                      | 80,356    | 81,655 [73,451-89,860]          | -1.6  |
| Metoclopramide hydrochloride                 | 57,953    | 56,231 [47,388-65,074]          | 3.1   |
| Domperidone                                  | 29,455    | 32,633 [-8,311-73,576]          | -9.7  |
| Cinnarizine                                  | 27,953    | 28,011 [24,985-31,037]          | -0.2  |
| Ondansetron hydrochloride                    | 22,169    | 22,768 [21,044-24,492]          | -2.6  |
| Hyoscine                                     | 10,907    | 11,267 [9,701-12,832]           | -3.2  |
| Hyoscine hydrobromide                        | 8,832     | 9,331 [5,721-12,941]            | -5.3  |
| Cyclizine lactate                            | 6,282     | 6,104 [4,438-7,770]             | 2.9   |
| Promethazine teoclate                        | 2,336     | 2,499 [971-4,026]               | -6.5  |
| Prochlorperazine mesilate                    | 582       | 479 [30-929]                    | 21.4  |
| Dimenhydrinatecinnarizine                    | 487       | 469 [387-550]                   | 3.9   |
| Doxylamine succinatepyridoxine hydrochloride | 342       | 314 [218-411]                   | 8.8   |
| Flunarizine dihydrochloride                  | 126       | 115 [81-150]                    | 9.5   |
| Ketamine hydrochloride                       | 120       | 111 [64-158]                    | 8     |
| Granisetron hydrochloride                    | 55        | 42 [4-80]                       | 30.3  |
| Nabilone                                     | 48        | 18 [-54-90]                     | 167.8 |
| Granisetron                                  | 44        | 33 [6-60]                       | 32.1  |
| Aprepitant                                   | 9         | 8 [-8-23]                       | 19.8  |
| 407 Analgesics                               | 5,594,383 | 5,119,539[4,684,937-5,554,140]  | 9.3   |
| Paracetamol                                  | 1,708,852 | 1,404,470 [1,235,864-1,573,075] | 21.7  |

|                                                           |           |                                 |       |
|-----------------------------------------------------------|-----------|---------------------------------|-------|
| Co-codamol (Codeine phosphateparacetamol)                 | 1,348,649 | 1,256,760 [1,158,324-1,355,196] | 7.3   |
| Tramadol hydrochloride                                    | 522,355   | 491,498 [439,995-543,001]       | 6.3   |
| Morphine sulfate                                          | 443,452   | 433,933 [399,980-467,885]       | 2.2   |
| Buprenorphine                                             | 205,846   | 204,863 [188,117-221,608]       | 0.5   |
| Methadone hydrochloride                                   | 173,731   | 154,144 [139,653-168,635]       | 12.7  |
| Sumatriptan succinate                                     | 172,873   | 160,796 [148,056-173,535]       | 7.5   |
| Oxycodone hydrochloride                                   | 154,114   | 154,332 [142,923-165,740]       | -0.1  |
| Co-dydramol (Dihydrocodeineparacetamol)                   | 150,515   | 135,948 [119,008-152,888]       | 10.7  |
| Dihydrocodeine tartrate                                   | 132,867   | 125,570 [115,263-135,877]       | 5.8   |
| Fentanyl                                                  | 84,298    | 83,467 [75,537-91,398]          | 1     |
| Pizotifen malate                                          | 46,656    | 44,855 [41,434-48,277]          | 4     |
| Zolmitriptan                                              | 34,513    | 31,044 [28,332-33,756]          | 11.2  |
| Clonidine hydrochloride                                   | 32,833    | 35,822 [32,575-39,068]          | -8.3  |
| Rizatriptan                                               | 30,573    | 27,724 [25,618-29,830]          | 10.3  |
| Nefopam hydrochloride                                     | 23,418    | 22,198 [9,804-34,592]           | 5.5   |
| Tapentadol hydrochloride                                  | 14,484    | 14,535 [13,339-15,732]          | -0.4  |
| Naratriptan hydrochloride                                 | 13,954    | 11,961 [10,733-13,188]          | 16.7  |
| Analgesics with anti-emetics                              | 12,653    | 10,495 [5,004-15,986]           | 20.6  |
| Meptazinol hydrochloride                                  | 5,832     | 5,907 [5,382-6,432]             | -1.3  |
| Frovatriptan                                              | 5,334     | 4,759 [4,337-5,180]             | 12.1  |
| Diamorphine hydrochloride (Systemic)                      | 4,244     | 5,833 [3,681-7,986]             | -27.2 |
| Oxycodone hydrochloridenaloxone hydrochloride             | 3,293     | 3,124 [2,580-3,667]             | 5.4   |
| Almotriptan                                               | 3,218     | 3,472 [3,087-3,857]             | -7.3  |
| Eletriptan                                                | 1,436     | 1,287 [1,117-1,456]             | 11.6  |
| Pethidine hydrochloride                                   | 1,171     | 1,428 [1,162-1,694]             | -18   |
| Co-proxamol (Dextropropoxyphene hydrochlorideparacetamol) | 919       | 190 [-2,489-2,868]              | 384.9 |
| Hydromorphone hydrochloride                               | 654       | 717 [586-847]                   | -8.8  |
| Tolfenamic acid                                           | 457       | 464 [343-584]                   | -1.4  |

|                                          |           |                                |       |
|------------------------------------------|-----------|--------------------------------|-------|
| Paracetamol combined preparations        | 425       | 408 [316-501]                  | 4     |
| Dipipanone hydrochloride                 | 168       | 103 [-333-540]                 | 62.4  |
| Pentazocine hydrochloride                | 119       | 104 [63-146]                   | 14.1  |
| Ergotamine tartrate                      | 107       | 121 [-132-375]                 | -11.8 |
| Isometheptene mucate                     | 54        | 170 [124-215]                  | -68.2 |
| Morphine tartrate and cyclizine tartrate | 33        | 25 [-57-108]                   | 30.3  |
| Other non-opioid analgesic preparations  | 28        | 26 [3-48]                      | 9     |
| Aspirin combined preparations            | 14        | 18 [-8-44]                     | -22.4 |
| Paracetamol and caffeine                 | 13        | 20 [-2-42]                     | -33.8 |
| Paracetamol and ibuprofen                | 11        | 16 [0-32]                      | -32.5 |
| Co-codaprin (Codeine phosphateaspirin)   | 4         | 19 [-15-53]                    | -79.2 |
| Aspirin and caffeine                     | 2         | 3 [-5-11]                      | -31.1 |
| Erenumab                                 | 1         | 3 [2-3]                        | -61.1 |
| Gabapentin (Neuropathic Pain)            | 1         | 2 [-2-6]                       | -47.8 |
| 408 Antiepileptic drugs                  | 2,572,716 | 2,439,620[2,260,327-2,618,913] | 5.5   |
| Pregabalin                               | 665,152   | 630,041 [579,935-680,147]      | 5.6   |
| Gabapentin                               | 642,973   | 587,018 [530,056-643,979]      | 9.5   |
| Lamotrigine                              | 272,800   | 258,158 [242,497-273,818]      | 5.7   |
| Levetiracetam                            | 221,432   | 212,788 [199,147-226,430]      | 4.1   |
| Sodium valproate                         | 213,337   | 212,059 [195,359-228,760]      | 0.6   |
| Carbamazepine                            | 196,801   | 187,469 [173,904-201,033]      | 5     |
| Topiramate                               | 89,293    | 85,234 [79,416-91,051]         | 4.8   |
| Clonazepam                               | 86,134    | 83,787 [77,759-89,815]         | 2.8   |
| Phenytoin sodium                         | 56,398    | 53,586 [48,432-58,740]         | 5.2   |
| Midazolam hydrochloride                  | 29,686    | 26,470 [22,600-30,339]         | 12.2  |
| Clobazam                                 | 29,647    | 28,072 [26,144-30,000]         | 5.6   |
| Phenobarbital                            | 15,934    | 15,277 [13,880-16,674]         | 4.3   |
| Lacosamide                               | 15,636    | 14,796 [13,883-15,709]         | 5.7   |

|                                                      |         |                           |       |
|------------------------------------------------------|---------|---------------------------|-------|
| Zonisamide                                           | 15,158  | 14,483 [13,532-15,435]    | 4.7   |
| Primidone                                            | 13,594  | 13,138 [12,182-14,093]    | 3.5   |
| Oxcarbazepine                                        | 9,657   | 9,609 [8,906-10,311]      | 0.5   |
| Perampanel                                           | 4,549   | 4,676 [4,295-5,056]       | -2.7  |
| Ethosuximide                                         | 3,645   | 3,247 [3,003-3,492]       | 12.2  |
| Brivaracetam                                         | 3,215   | 3,054 [2,707-3,400]       | 5.3   |
| Eslicarbazepine acetate                              | 2,165   | 2,120 [1,968-2,273]       | 2.1   |
| Phenytoin                                            | 1,508   | 1,421 [1,117-1,726]       | 6.1   |
| Midazolam maleate                                    | 1,360   | 1,771 [1,062-2,480]       | -23.2 |
| Vigabatrin                                           | 1,169   | 1,120 [998-1,242]         | 4.4   |
| Rufinamide                                           | 1,113   | 1,062 [913-1,211]         | 4.8   |
| Stiripentol                                          | 293     | 253 [207-299]             | 15.8  |
| Paraldehyde                                          | 123     | 112 [73-152]              | 9.5   |
| Tiagabine                                            | 108     | 109 [55-163]              | -0.6  |
| Phenobarbital sodium                                 | 29      | 29 [0-57]                 | 1.2   |
| Sultiame                                             | 22      | 31 [-40-102]              | -28.6 |
| Felbamate                                            | 4       | 5 [-8-18]                 | -22.1 |
| 409 Drugs used in Parkinsonism and related disorders | 453,890 | 443,758[413,814-473,702]  | 2.3   |
| Co-careldopa (Carbidopalevodopa)                     | 112,139 | 111,102 [103,601-118,604] | 0.9   |
| Co-beneldopa (Benserazidelevodopa)                   | 88,668  | 85,980 [80,187-91,772]    | 3.1   |
| Procyclidine hydrochloride                           | 73,452  | 74,311 [69,089-79,534]    | -1.2  |
| Ropinirole hydrochloride                             | 56,430  | 53,703 [49,982-57,424]    | 5.1   |
| Pramipexole                                          | 41,886  | 40,116 [37,083-43,150]    | 4.4   |
| Rasagiline mesilate                                  | 17,789  | 17,169 [15,498-18,840]    | 3.6   |
| Levodopacarbidopaentacapone                          | 13,085  | 12,754 [11,532-13,976]    | 2.6   |
| Amantadine hydrochloride                             | 11,636  | 11,222 [10,356-12,087]    | 3.7   |
| Rotigotine                                           | 11,464  | 11,280 [10,254-12,305]    | 1.6   |
| Trihexyphenidyl hydrochloride                        | 10,242  | 10,216 [9,329-11,102]     | 0.3   |

|                                                |         |                           |        |
|------------------------------------------------|---------|---------------------------|--------|
| Entacapone                                     | 4,312   | 3,928 [3,575-4,281]       | 9.8    |
| Tetrabenazine                                  | 2,577   | 2,429 [2,148-2,710]       | 6.1    |
| Selegiline hydrochloride                       | 2,454   | 2,477 [2,160-2,795]       | -0.9   |
| Riluzole                                       | 1,804   | 1,674 [1,519-1,829]       | 7.8    |
| Opicapone                                      | 1,803   | 2,583 [2,313-2,853]       | -30.2  |
| Safinamide                                     | 1,428   | 1,562 [1,413-1,711]       | -8.6   |
| Apomorphine hydrochloride                      | 943     | 928 [808-1,049]           | 1.6    |
| Piracetam                                      | 648     | 642 [549-735]             | 1      |
| Orphenadrine hydrochloride                     | 531     | 195 [-1,716-2,107]        | 171.8  |
| Tolcapone                                      | 34      | 42 [18-67]                | -19.4  |
| Apomorphine hydrochloride hemihydrate          | 29      | -1 [-24-22]               | -3000  |
| Botulinum toxin type A                         | 15      | 12 [-1-25]                | 20.6   |
| Benzatropine mesilate                          | 6       | 17 [-7-41]                | -64.2  |
| Pergolide mesilate                             | 1       | -24 [-85-37]              | -104.2 |
| 410 Drugs used in substance dependence         | 311,708 | 290,149[258,253-322,044]  | 7.4    |
| Methadone hydrochloride                        | 173,731 | 154,144 [139,653-168,635] | 12.7   |
| Buprenorphine hydrochloride                    | 64,399  | 58,554 [54,308-62,800]    | 10     |
| Nicotine                                       | 32,219  | 35,408 [24,323-46,494]    | -9     |
| Varenicline tartrate                           | 25,755  | 26,155 [19,408-32,902]    | -1.5   |
| Acamprosate calcium                            | 10,570  | 10,483 [9,450-11,515]     | 0.8    |
| Disulfiram                                     | 2,609   | 2,483 [1,431-3,536]       | 5.1    |
| Bupropion hydrochloride                        | 2,388   | 2,301 [2,090-2,511]       | 3.8    |
| Naltrexone hydrochloride                       | 1,346   | 1,462 [1,152-1,772]       | -7.9   |
| Buprenorph hydrochloridenaloxone hydrochloride | 700     | 59 [-1,565-1,683]         | 1081.5 |
| Nicotine bitartrate                            | 273     | 237 [119-356]             | 15.1   |
| Nalmefene                                      | 102     | 212 [-85-510]             | -52    |
| 411 Dementia                                   | 341,235 | 351,408[323,970-378,846]  | -2.9   |
| Donepezil hydrochloride                        | 172,971 | 177,922 [162,969-192,876] | -2.8   |

|                                               |           |                                |      |
|-----------------------------------------------|-----------|--------------------------------|------|
| Memantine hydrochloride                       | 122,325   | 126,503 [117,152-135,854]      | -3.3 |
| Rivastigmine                                  | 32,640    | 33,350 [30,610-36,090]         | -2.1 |
| Galantamine                                   | 13,299    | 12,906 [11,202-14,611]         | 3    |
| 501 Antibacterial drugs                       | 2,795,044 | 2,677,212[2,254,209-3,100,216] | 4.4  |
| Amoxicillin                                   | 696,938   | 638,597 [412,665-864,529]      | 9.1  |
| Nitrofurantoin                                | 340,385   | 372,145 [326,304-417,986]      | -8.5 |
| Doxycycline hyclate                           | 322,373   | 274,804 [234,033-315,575]      | 17.3 |
| Flucloxacillin sodium                         | 283,531   | 302,824 [252,236-353,412]      | -6.4 |
| Phenoxymethylpenicillin (Penicillin V)        | 225,410   | 241,461 [203,421-279,500]      | -6.6 |
| Clarithromycin                                | 192,158   | 188,908 [148,505-229,312]      | 1.7  |
| Trimethoprim                                  | 129,447   | 115,557 [65,806-165,309]       | 12   |
| Co-amoxiclav (Amoxicillinclavulanic acid)     | 112,855   | 104,262 [80,235-128,288]       | 8.2  |
| Lymecycline                                   | 91,203    | 94,302 [85,544-103,061]        | -3.3 |
| Azithromycin                                  | 78,101    | 68,650 [63,680-73,619]         | 13.8 |
| Metronidazole                                 | 73,344    | 77,981 [70,054-85,909]         | -5.9 |
| Cefalexin                                     | 64,465    | 62,290 [51,256-73,323]         | 3.5  |
| Ciprofloxacin                                 | 46,004    | 45,788 [37,801-53,775]         | 0.5  |
| Oxytetracycline                               | 25,674    | 23,817 [19,084-28,551]         | 7.8  |
| Pivmecillinam hydrochloride                   | 21,871    | 24,310 [20,238-28,382]         | -10  |
| Erythromycin ethylsuccinate                   | 18,226    | 17,170 [5,473-28,868]          | 6.1  |
| Co-trimoxazole(Trimethoprim sulfamethoxazole) | 17,485    | 15,703 [14,518-16,887]         | 11.3 |
| Methenamine hippurate                         | 10,049    | 7,771 [6,004-9,537]            | 29.3 |
| Rifaximin                                     | 6,794     | 6,572 [6,102-7,043]            | 3.4  |
| Clindamycin hydrochloride                     | 6,587     | 6,859 [5,956-7,762]            | -4   |
| Fosfomicin trometamol                         | 5,594     | 6,022 [5,347-6,697]            | -7.1 |
| Ofloxacin                                     | 4,663     | 4,638 [3,598-5,678]            | 0.5  |
| Colistimethate sodium                         | 3,445     | 2,897 [2,549-3,245]            | 18.9 |
| Levofloxacin                                  | 2,950     | 2,876 [2,565-3,187]            | 2.6  |

|                                         |       |                     |        |
|-----------------------------------------|-------|---------------------|--------|
| Sodium fusidate                         | 2,485 | 2,834 [2,125-3,544] | -12.3  |
| Dapsone                                 | 2,353 | 2,195 [1,988-2,403] | 7.2    |
| Tetracycline                            | 2,165 | 1,887 [1,510-2,265] | 14.7   |
| Minocycline hydrochloride               | 1,941 | 1,878 [1,227-2,529] | 3.4    |
| Cefradine                               | 1,852 | 1,476 [951-2,000]   | 25.5   |
| Rifampicin                              | 1,504 | 1,386 [1,147-1,626] | 8.5    |
| Isoniazid                               | 1,247 | 1,409 [1,001-1,817] | -11.5  |
| Doxycycline monohydrate                 | 973   | 523 [-38-1,084]     | 86     |
| Erythromycin stearate                   | 758   | 1,715 [431-2,998]   | -55.8  |
| Cefaclor                                | 698   | 980 [389-1,571]     | -28.8  |
| Moxifloxacin                            | 477   | 434 [333-536]       | 9.8    |
| Demeclocycline hydrochloride            | 444   | 290 [-395-975]      | 53.1   |
| Ethambutol hydrochloride                | 426   | 432 [308-555]       | -1.3   |
| Vancomycin hydrochloride                | 411   | 324 [219-429]       | 26.9   |
| Cefuroxime axetil                       | 394   | 349 [206-491]       | 12.9   |
| Rifampicin combined preparations        | 161   | 157 [43-272]        | 2.3    |
| Tinidazole                              | 157   | 119 [9-230]         | 31.4   |
| Cefixime                                | 129   | 151 [16-285]        | -14.3  |
| Linezolid                               | 124   | 87 [43-131]         | 42.2   |
| Ampicillin                              | 113   | 113 [42-184]        | 0.1    |
| Tobramycin                              | 109   | 78 [18-138]         | 39.9   |
| Co-fluampicil(Flucloxacillinampicillin) | 66    | -266 [-909-378]     | -124.8 |
| Ceftriaxone sodium                      | 66    | 71 [4-137]          | -6.5   |
| Cefadroxil                              | 61    | 6 [-184-196]        | 922.9  |
| Teicoplanin                             | 39    | 63 [-75-201]        | -38    |
| Sulfadiazine                            | 31    | 12 [-150-175]       | 154.3  |
| Benzylpenicillin sodium (Penicillin G)  | 28    | 58 [3-114]          | -52    |
| Meropenem                               | 19    | 16 [-20-52]         | 21.1   |

|                                       |         |                          |        |
|---------------------------------------|---------|--------------------------|--------|
| Fidaxomicin                           | 17      | 13 [1-24]                | 32.9   |
| Rifabutin                             | 16      | 17 [1-34]                | -7.3   |
| Amoxicillin sodium                    | 14      | 12 [-9-33]               | 18.1   |
| Ertapenem sodium                      | 12      | 0 [-80-81]               | 2355.8 |
| Ceftazidime pentahydrate              | 9       | 14 [-3-32]               | -36.7  |
| Clofazimine                           | 8       | 9 [3-16]                 | -15.4  |
| Pyrazinamide                          | 7       | 5 [-20-30]               | 31.9   |
| Norfloxacin                           | 5       | 10 [-29-48]              | -47.6  |
| Piperacillin sodium/tazobactam sodium | 5       | 9 [-96-113]              | -41.5  |
| Cefotaxime sodium                     | 4       | 10 [-3-22]               | -58.2  |
| Aztreonam                             | 4       | 2 [-4-8]                 | 105.4  |
| Cefuroxime sodium                     | 3       | 9 [-5-23]                | -66.2  |
| Fosfomycin calcium                    | 3       | 16 [-10-42]              | -81.7  |
| Amikacin                              | 1       | 3 [-12-18]               | -67.3  |
| Daptomycin                            | 1       | 1 [-24-27]               | -0.9   |
| Flucloxacillin magnesium              | 1       | 1 [-6-7]                 | 70.3   |
| Sulfapyridine                         | 1       | 3 [-2-7]                 | -60.3  |
| 502 Antifungal drugs                  | 133,826 | 138,412[123,479-153,344] | -3.3   |
| Nystatin                              | 54,584  | 56,465 [48,611-64,319]   | -3.3   |
| Terbinafine hydrochloride             | 43,698  | 47,301 [39,162-55,440]   | -7.6   |
| Fluconazole                           | 42,162  | 44,288 [39,673-48,903]   | -4.8   |
| Itraconazole                          | 7,321   | 8,034 [6,749-9,319]      | -8.9   |
| Griseofulvin                          | 306     | 312 [183-441]            | -2     |
| Voriconazole                          | 43      | 21 [-13-54]              | 109.7  |
| Posaconazole                          | 17      | 27 [-4-58]               | -37.7  |
| Amphotericin                          | 8       | 6 [-5-17]                | 32.8   |
| Isavuconazole                         | 1       | 1 [-2-4]                 | -12.9  |
| 503 Antiviral drugs                   | 94,008  | 92,485[84,327-100,643]   | 1.6    |



|                                              |         |                           |        |
|----------------------------------------------|---------|---------------------------|--------|
| Aciclovir                                    | 98,198  | 93,836 [87,456-100,215]   | 4.6    |
| Valaciclovir                                 | 4,002   | 3,855 [3,566-4,144]       | 3.8    |
| Oseltamivir phosphate                        | 901     | 1,172 [-9,314-11,658]     | -23.1  |
| Famciclovir                                  | 559     | 529 [403-656]             | 5.6    |
| Lamivudine                                   | 298     | 320 [265-376]             | -6.9   |
| Entecavir                                    | 115     | 110 [58-162]              | 4.4    |
| Tenofovir disoproxil                         | 111     | 109 [65-152]              | 2.2    |
| Valganciclovir hydrochloride                 | 41      | 40 [3-77]                 | 3.1    |
| Zanamivir                                    | 39      | 13 [-14-39]               | 203.6  |
| Inosine pranobex                             | 18      | 16 [2-31]                 | 11     |
| Emtricitabine and tenofovir disoproxil       | 11      | 14 [-1-28]                | -18.7  |
| Efavirenz/emtricitabine/tenofovir disoproxil | 5       | 9 [-1-19]                 | -45    |
| Darunavir                                    | 5       | 1 [-12-14]                | 300.4  |
| Raltegravir                                  | 5       | 14 [1-26]                 | -64.1  |
| Abacavir and lamivudine                      | 5       | 1 [-4-7]                  | 352.5  |
| Adefovir dipivoxil                           | 3       | 5 [-4-14]                 | -38.7  |
| Lopinavir and ritonavir                      | 2       | 0 [-4-3]                  | -875.8 |
| Ribavirin                                    | 2       | -2 [-27-24]               | -227.4 |
| Emtricitabine and tenofovir alafenamide      | 2       | 5 [2-7]                   | -57.3  |
| Dolutegravir                                 | 2       | 6 [-1-13]                 | -64    |
| Ritonavir                                    | 1       | 5 [-8-17]                 | -78.6  |
| Nevirapine                                   | 1       | 1 [-3-6]                  | -25.4  |
| Sofosbuvir/dedipasvir                        | 1       | 1 [-1-2]                  | 57.4   |
| Other HIV infection preparations             | 1       | 8 [0-17]                  | -87.9  |
| Emtricitabine                                | 1       | 0 [-2-1]                  | -529.9 |
| 504 Antiprotozoal drugs                      | 242,384 | 234,341 [208,955-259,728] | 3.4    |
| Quinine sulfate                              | 213,458 | 214,078 [192,814-235,341] | -0.3   |
| Quinine bisulfate                            | 28,480  | 27,491 [18,581-36,400]    | 3.6    |

|                                         |           |                                 |        |
|-----------------------------------------|-----------|---------------------------------|--------|
| Mepacrine hydrochloride                 | 150       | 154 [91-218]                    | -2.9   |
| Chloroquine phosphate                   | 136       | 102 [39-166]                    | 32.7   |
| Proguanil hydrochloride with atovaquone | 53        | 111 [-30-252]                   | -52.3  |
| Atovaquone                              | 46        | 33 [10-56]                      | 41.4   |
| Mefloquine hydrochloride                | 36        | -236 [-1,096-625]               | -115.3 |
| Pyrimethamine                           | 22        | 19 [7-32]                       | 14.6   |
| Proguanil hydrochloride                 | 1         | -6 [-31-19]                     | -117.4 |
| Artemether with lumefantrine            | 1         | 1 [-3-5]                        | 45.6   |
| Primaquine                              | 1         | -1 [-3-2]                       | -213.2 |
| 505 Anthelmintics                       | 6,066     | 7,553[5,331-9,775]              | -19.7  |
| Mebendazole                             | 5,979     | 7,457 [5,246-9,669]             | -19.8  |
| Albendazole                             | 27        | 26 [9-43]                       | 3.2    |
| Levamisole hydrochloride                | 24        | 24 [1-48]                       | -1.7   |
| Praziquantel                            | 3         | 9 [-5-22]                       | -65.1  |
| 601 Drugs used in diabetes              | 5,297,866 | 4,887,373[4,554,891-5,219,854]  | 8.4    |
| Metformin hydrochloride                 | 2,045,234 | 1,920,314 [1,788,117-2,052,510] | 6.5    |
| Glucose blood testing reagents          | 624,352   | 559,310 [511,117-607,504]       | 11.6   |
| Gliclazide                              | 582,008   | 550,774 [504,548-597,000]       | 5.7    |
| Insulin aspart                          | 212,386   | 167,378 [155,482-179,274]       | 26.9   |
| Sitagliptin                             | 211,570   | 203,714 [183,890-223,538]       | 3.9    |
| Linagliptin                             | 196,588   | 198,083 [183,253-212,914]       | -0.8   |
| Insulin glargine                        | 161,747   | 134,665 [125,055-144,275]       | 20.1   |
| Empagliflozin                           | 150,564   | 139,870 [133,700-146,039]       | 7.6    |
| Alogliptin                              | 136,942   | 135,809 [125,750-145,867]       | 0.8    |
| Dapagliflozin                           | 113,517   | 108,854 [93,477-124,231]        | 4.3    |
| Biphasic insulin aspart                 | 73,109    | 64,026 [58,283-69,769]          | 14.2   |
| Biphasic isophane insulin               | 66,518    | 60,812 [54,995-66,629]          | 9.4    |
| Insulin detemir                         | 63,897    | 52,250 [47,411-57,090]          | 22.3   |

|                                     |        |                        |      |
|-------------------------------------|--------|------------------------|------|
| Pioglitazone hydrochloride          | 62,444 | 59,667 [50,462-68,873] | 4.7  |
| Isophane insulin                    | 62,177 | 55,740 [50,436-61,044] | 11.5 |
| Dulaglutide                         | 58,710 | 56,938 [54,921-58,955] | 3.1  |
| Glimepiride                         | 52,131 | 47,780 [43,140-52,420] | 9.1  |
| Canagliflozin                       | 50,232 | 48,704 [42,597-54,811] | 3.1  |
| Insulin Lispro                      | 45,604 | 37,383 [34,702-40,064] | 22   |
| Insulin degludec                    | 45,420 | 38,931 [35,916-41,945] | 16.7 |
| Liraglutide                         | 44,516 | 45,235 [40,071-50,400] | -1.6 |
| Ketone blood testing reagents       | 34,507 | 24,830 [23,238-26,422] | 39   |
| Glucose                             | 33,780 | 28,449 [26,296-30,602] | 18.7 |
| Biphasic insulin lispro             | 29,286 | 26,868 [24,291-29,445] | 9    |
| Semaglutide                         | 24,634 | 23,125 [20,259-25,991] | 6.5  |
| Saxagliptin                         | 16,680 | 15,920 [13,404-18,435] | 4.8  |
| Metformin hydrochloridesitagliptin  | 13,798 | 13,246 [11,938-14,554] | 4.2  |
| Insulin glulisine                   | 9,483  | 8,036 [7,308-8,763]    | 18   |
| Urine testing reagents              | 9,177  | 6,407 [5,458-7,357]    | 43.2 |
| Exenatide                           | 8,918  | 8,438 [6,415-10,461]   | 5.7  |
| Glucagon                            | 8,297  | 6,493 [5,490-7,497]    | 27.8 |
| Alogliptinmetformin                 | 6,680  | 6,935 [6,250-7,620]    | -3.7 |
| Linagliptinmetformin                | 5,518  | 5,426 [4,838-6,014]    | 1.7  |
| Empagliflozinmetformin              | 5,463  | 5,374 [5,014-5,733]    | 1.7  |
| Repaglinide                         | 4,646  | 4,319 [3,852-4,785]    | 7.6  |
| Soluble insulin (Neutral insulin)   | 3,987  | 3,293 [2,874-3,712]    | 21.1 |
| Vildagliptin                        | 3,886  | 3,618 [2,854-4,383]    | 7.4  |
| Dapagliflozinmetformin              | 3,774  | 3,657 [3,362-3,953]    | 3.2  |
| Metformin hydrochloridevildagliptin | 3,645  | 3,544 [3,083-4,006]    | 2.8  |
| Lixisenatide                        | 3,368  | 3,259 [1,351-5,168]    | 3.3  |
| Glipizide                           | 2,645  | 2,240 [-889-5,369]     | 18.1 |

|                                           |           |                                 |        |
|-------------------------------------------|-----------|---------------------------------|--------|
| Acarbose                                  | 2,406     | 2,272 [1,842-2,703]             | 5.9    |
| Metformin hydrochloridepioglitazone       | 2,281     | 1,893 [703-3,083]               | 20.5   |
| Ins degludecliraglutide                   | 2,193     | 2,176 [1,900-2,451]             | 0.8    |
| Tolbutamide                               | 1,457     | 1,367 [810-1,924]               | 6.6    |
| Canagliflozinmetformin                    | 1,060     | 1,098 [952-1,244]               | -3.4   |
| Saxagliptinmetformin                      | 903       | 905 [629-1,180]                 | -0.2   |
| Saxagliptindapagliflozin                  | 864       | 962 [689-1,235]                 | -10.2  |
| Nateglinide                               | 570       | 496 [370-623]                   | 14.9   |
| Ertugliflozin                             | 449       | 431 [318-545]                   | 4.1    |
| Diazoxide                                 | 173       | 119 [44-193]                    | 45.8   |
| Glibenclamide                             | 131       | 353 [-977-1,683]                | -62.9  |
| Empagliflozinlinagliptin                  | 123       | 123 [88-158]                    | 0.4    |
| Insulin glarginelixisenatide              | 57        | 23 [12-35]                      | 146.1  |
| Glucose and ketone blood testing reagents | 12        | 10 [-38-57]                     | 23.8   |
| Insulin human                             | 11        | 13 [-5-32]                      | -18.4  |
| 602 Thyroid and antithyroid drugs         | 3,113,121 | 2,857,925[2,666,610-3,049,239]  | 8.9    |
| Levothyroxine sodium                      | 3,050,815 | 2,801,281 [2,613,659-2,988,903] | 8.9    |
| Carbimazole                               | 53,232    | 48,985 [45,696-52,274]          | 8.7    |
| Liothyronine sodium                       | 5,095     | 4,357 [3,791-4,922]             | 17     |
| Propylthiouracil                          | 3,761     | 3,330 [3,012-3,647]             | 13     |
| Levothyroxine sodium and liothyronine     | 216       | 244 [172-317]                   | -11.6  |
| Iodine                                    | 1         | 0 [-7-7]                        | -929.5 |
| 603 Corticosteroids (endocrine)           | 855,211   | 713,593[644,392-782,795]        | 19.8   |
| Prednisolone                              | 763,412   | 641,691 [571,633-711,748]       | 19     |
| Dexamethasone                             | 155,189   | 176,536 [151,911-201,161]       | -12.1  |
| Fludrocortisone acetate                   | 49,156    | 46,505 [43,289-49,722]          | 5.7    |
| Betamethasone sodium phosphate            | 20,411    | 23,508 [17,986-29,030]          | -13.2  |
| Hydrocortisone sodium phosphate           | 1,769     | 762 [-215-1,739]                | 132.3  |

|                                         |         |                           |        |
|-----------------------------------------|---------|---------------------------|--------|
| Hydrocortisone sodium succinate         | 1,294   | 806 [324-1,288]           | 60.5   |
| Dexamethasone phosphate                 | 878     | 997 [663-1,332]           | -12    |
| Deflazacort                             | 471     | 429 [366-492]             | 9.7    |
| Methylprednisolone                      | 400     | 471 [370-573]             | -15.1  |
| Dexamethasone sodium phosphate          | 69      | 60 [-86-206]              | 15     |
| Prednisone                              | 6       | -48 [-139-44]             | -112.6 |
| Methylprednisolone sodium succinate     | 4       | 5 [-8-18]                 | -12.6  |
| Cortisone acetate                       | 4       | 5 [-3-13]                 | -17.7  |
| 604 Sex hormones                        | 770,631 | 745,674[694,379-796,969]  | 3.3    |
| Finasteride                             | 338,967 | 326,722 [304,725-348,720] | 3.7    |
| Estradiol                               | 237,325 | 224,736 [207,708-241,765] | 5.6    |
| Estradiol with progestogen              | 110,135 | 121,996 [104,461-139,531] | -9.7   |
| Progesterone                            | 31,627  | 29,464 [26,578-32,350]    | 7.3    |
| Norethisterone                          | 26,482  | 42,208 [33,030-51,385]    | -37.3  |
| Dutasteride                             | 25,728  | 24,471 [20,723-28,219]    | 5.1    |
| Testosterone                            | 24,867  | 22,077 [19,533-24,620]    | 12.6   |
| Tibolone                                | 17,374  | 16,562 [15,018-18,106]    | 4.9    |
| Oestrogens conjugated                   | 16,508  | 14,929 [12,517-17,341]    | 10.6   |
| Estradiol valerate                      | 13,550  | 8,624 [1,271-15,978]      | 57.1   |
| Testosterone undecanoate                | 11,640  | 12,043 [10,624-13,462]    | -3.3   |
| Testosterone esters                     | 4,316   | 4,553 [4,089-5,017]       | -5.2   |
| Raloxifene hydrochloride                | 4,233   | 3,839 [3,296-4,381]       | 10.3   |
| Oestrogens conjugated with progestogen  | 3,036   | 1,011 [-4,615-6,638]      | 200.2  |
| Estradiol and estriol with progestogen  | 775     | 692 [419-965]             | 12     |
| Testosterone enantate                   | 698     | 677 [474-879]             | 3.2    |
| Prasterone                              | 112     | 58 [28-88]                | 93.8   |
| Oestrogens conjugated with bazedoxifene | 43      | 38 [12-64]                | 13     |
| Ethinylestradiol                        | 34      | -22 [-174-131]            | -257.8 |

|                                                           |         |                           |        |
|-----------------------------------------------------------|---------|---------------------------|--------|
| Nandrolone decanoate                                      | 7       | 6 [-7-19]                 | 17.7   |
| Oxandrolone                                               | 2       | 8 [2-14]                  | -74.3  |
| Dydrogesterone                                            | 2       | 1 [-5-6]                  | 140.8  |
| Testosterone propionate                                   | 1       | 4 [0-7]                   | -72    |
| 605 Hypothalamic and pituitary hormones and antioestrogen | 32,665  | 31,371[28,907-33,835]     | 4.1    |
| Desmopressin acetate                                      | 27,459  | 26,290 [24,273-28,308]    | 4.4    |
| Somatropin                                                | 4,923   | 4,545 [3,979-5,110]       | 8.3    |
| Clomifene citrate                                         | 241     | 207 [102-312]             | 16.3   |
| Choriogonadotropin alfa                                   | 13      | 13 [-1-27]                | -0.8   |
| Tolvaptan                                                 | 12      | 9 [-16-35]                | 29     |
| Menotrophin                                               | 9       | 6 [-6-19]                 | 40.7   |
| Tetracosactide                                            | 6       | 18 [0-37]                 | -67.5  |
| Chorionic gonadotrophin                                   | 1       | -3 [-54-48]               | -133.6 |
| 606 Drugs affecting bone metabolism                       | 584,409 | 545,308[495,187-595,429]  | 7.2    |
| Alendronic acid                                           | 508,882 | 486,474 [443,717-529,231] | 4.6    |
| Risedronate sodium                                        | 53,823  | 51,175 [46,864-55,486]    | 5.2    |
| Ibandronic acid                                           | 15,016  | 13,785 [12,335-15,235]    | 8.9    |
| Denosumab                                                 | 5,287   | 6,250 [5,662-6,838]       | -15.4  |
| Sodium clodronate                                         | 782     | 763 [530-996]             | 2.5    |
| Alendronic acidcolecalciferol                             | 385     | 369 [185-552]             | 4.5    |
| Strontium ranelate                                        | 130     | -508 [-3,159-2,142]       | -125.6 |
| Teriparatide                                              | 63      | 67 [41-92]                | -5.4   |
| Other bisphosphonate and other preparations               | 30      | 23 [4-42]                 | 32.8   |
| Zoledronic acid                                           | 8       | 4 [-6-14]                 | 98.2   |
| Calcitonin (Salmon)                                       | 3       | 10 [-6-26]                | -71.2  |
| 607 Other endocrine drugs                                 | 8,824   | 7,920[7,357-8,483]        | 11.4   |
| Cabergoline                                               | 7,331   | 6,404 [5,952-6,855]       | 14.5   |
| Bromocriptine                                             | 974     | 987 [837-1,137]           | -1.3   |

|                                                   |         |                           |       |
|---------------------------------------------------|---------|---------------------------|-------|
| Quinagolide hydrochloride                         | 418     | 383 [310-455]             | 9.2   |
| Danazol                                           | 417     | 413 [339-488]             | 0.9   |
| Metyrapone                                        | 118     | 88 [45-131]               | 34.1  |
| Nafarelin acetate                                 | 76      | 66 [39-92]                | 16    |
| Buserelin                                         | 6       | 10 [1-19]                 | -39.1 |
| Cetrorelix                                        | 2       | 2 [-3-7]                  | 12.8  |
| 701 Drugs used in obstetrics                      | 0       | 0[-2-3]                   | -100  |
| 702 Treatment of vaginal and vulval conditions    | 228,148 | 226,742[208,814-244,670]  | 0.6   |
| Clotrimazole                                      | 112,414 | 123,923 [105,896-141,950] | -9.3  |
| Estriol                                           | 62,215  | 59,507 [55,257-63,757]    | 4.6   |
| Econazole nitrate                                 | 637     | 638 [435-841]             | -0.2  |
| Dequalinium chloride                              | 92      | 110 [27-193]              | -16.4 |
| Ospemifene                                        | 37      | 74 [60-87]                | -49.7 |
| Fenticonazole nitrate                             | 7       | 6 [-15-26]                | 20.8  |
| Boric acid                                        | 2       | 3 [0-6]                   | -31.7 |
| 703 Contraceptives                                | 711,935 | 669,551[610,977-728,126]  | 6.3   |
| Desogestrel                                       | 280,841 | 248,285 [227,758-268,813] | 13.1  |
| Combined ethinylestradiol 30mcg                   | 259,387 | 234,931 [211,422-258,440] | 10.4  |
| Medroxyprogesterone acetate                       | 78,939  | 87,980 [80,172-95,787]    | -10.3 |
| Combined ethinylestradiol 20mcg                   | 37,336  | 32,932 [29,192-36,671]    | 13.4  |
| Combined ethinylestradiol 35mcg                   | 23,745  | 22,630 [18,728-26,532]    | 4.9   |
| Levonorgestrel                                    | 17,986  | 22,174 [18,620-25,729]    | -18.9 |
| Etonogestrel                                      | 8,448   | 12,428 [10,714-14,141]    | -32   |
| Phased formulations of ethinylestradiol           | 3,420   | 2,767 [1,718-3,816]       | 23.6  |
| Ulipristal acetate (Emergency Contraceptive)      | 2,422   | 3,240 [1,862-4,618]       | -25.2 |
| Etonogestrel/ethinylestradiol                     | 1,744   | 1,520 [1,267-1,773]       | 14.7  |
| Estradiol valandestradiol valerate with dienogest | 1,031   | 865 [750-981]             | 19.1  |
| Nonoxinol 9                                       | 118     | 109 [45-173]              | 8.3   |

|                                             |           |                                |        |
|---------------------------------------------|-----------|--------------------------------|--------|
| Combined mestranol                          | 116       | 88 [48-129]                    | 31.6   |
| Estradiol and norgestrel                    | 16        | -69 [-238-100]                 | -123.2 |
| Norethisterone enantate                     | 4         | -3 [-47-40]                    | -215.6 |
| Ethinodiol diacetate                        | 1         | 4 [-22-29]                     | -71.6  |
| 704 Drugs used for genito-urinary disorders | 1,823,841 | 1,766,697[1,623,568-1,909,826] | 3.2    |
| Tamsulosin hydrochloride                    | 696,782   | 661,418 [617,530-705,305]      | 5.3    |
| Sildenafil (Erectile Dysfunction)           | 298,189   | 324,424 [270,811-378,036]      | -8.1   |
| Solifenacin                                 | 215,730   | 202,170 [187,599-216,741]      | 6.7    |
| Mirabegron                                  | 137,378   | 136,215 [125,206-147,225]      | 0.9    |
| Oxybutynin                                  | 126,146   | 122,618 [111,714-133,523]      | 2.9    |
| Tolterodine                                 | 107,282   | 110,088 [101,445-118,732]      | -2.5   |
| Tadalafil                                   | 68,952    | 68,892 [62,974-74,810]         | 0.1    |
| Alfuzosin hydrochloride                     | 42,843    | 39,590 [36,033-43,147]         | 8.2    |
| Trospium chloride                           | 26,650    | 26,554 [23,989-29,119]         | 0.4    |
| Fesoterodine fumarate                       | 20,207    | 19,307 [17,678-20,937]         | 4.7    |
| Tamsulosin and dutasteride hydrochloride    | 13,953    | 13,404 [10,375-16,433]         | 4.1    |
| Darifenacin hydrobromide                    | 11,947    | 12,927 [10,967-14,888]         | -7.6   |
| Alprostadil                                 | 8,399     | 7,967 [6,112-9,822]            | 5.4    |
| Vardenafil                                  | 6,747     | 6,547 [5,025-8,069]            | 3.1    |
| Solifenacintamsulosin                       | 4,431     | 4,555 [3,644-5,467]            | -2.7   |
| Indoramin                                   | 3,582     | 3,318 [2,717-3,919]            | 8      |
| Propiverine hydrochloride                   | 2,637     | 2,525 [2,223-2,827]            | 4.4    |
| Potassium citrate                           | 2,005     | 1,991 [1,743-2,240]            | 0.7    |
| Flavoxate hydrochloride                     | 1,349     | 1,293 [1,043-1,544]            | 4.3    |
| Avanafil                                    | 848       | 866 [591-1,140]                | -2     |
| Phentolamineaviptadil                       | 523       | 543 [443-643]                  | -3.7   |
| Dapoxetine hydrochloride                    | 464       | 582 [460-705]                  | -20.3  |
| Sodium citrate                              | 113       | 106 [48-165]                   | 6.3    |



|                                                                            |         |                        |        |
|----------------------------------------------------------------------------|---------|------------------------|--------|
| Chlorhexidine acetate                                                      | 97      | 82 [-73-237]           | 18     |
| Bethanechol chloride                                                       | 54      | 59 [34-84]             | -8     |
| Other urological pain preparations                                         | 21      | 17 [2-33]              | 20.4   |
| Distigmine bromide                                                         | 10      | 9 [-5-23]              | 15     |
| Lidocaineprilocaine (Premature Ejaculation)                                | 4       | 1 [-1-2]               | 691.2  |
| Yohimbine hydrochloride                                                    | 3       | 3 [-6-12]              | -1.1   |
| 801 Cytotoxic drugs (malignancy and immunosuppression)                     | 17,607  | 16,164[15,028-17,300]  | 8.9    |
| Hydroxycarbamide                                                           | 8,622   | 7,785 [7,175-8,394]    | 10.8   |
| Mercaptopurine                                                             | 6,273   | 5,656 [5,139-6,173]    | 10.9   |
| Calcium folinate                                                           | 222     | 263 [217-309]          | -15.7  |
| Cyclophosphamide                                                           | 14      | 16 [-34-67]            | -14.7  |
| Tioguanine                                                                 | 4       | 4 [-2-11]              | -9.3   |
| Imatinib mesilate                                                          | 4       | 3 [-11-17]             | 43.7   |
| Everolimus                                                                 | 2       | 1 [-2-3]               | 135.4  |
| Mitotane                                                                   | 1       | 2 [-2-6]               | -39.8  |
| Mesna                                                                      | 1       | -1 [-6-4]              | -197.9 |
| Capecitabine                                                               | 1       | 1 [-2-3]               | 87.6   |
| Ibrutinib                                                                  | 1       | 1 [-1-3]               | 82.2   |
| Abemaciclib                                                                | 1       | 0 [0-0]                | Inf    |
| 802 Drugs affecting the immune response (malignancy and immunosuppression) | 107,974 | 98,259[90,613-105,904] | 9.9    |
| Azathioprine                                                               | 71,777  | 67,009 [62,092-71,927] | 7.1    |
| Tacrolimus                                                                 | 28,930  | 24,388 [22,060-26,717] | 18.6   |
| Mycophenolate mofetil                                                      | 18,317  | 16,237 [14,988-17,485] | 12.8   |
| Ciclosporin                                                                | 5,592   | 4,904 [3,700-6,109]    | 14     |
| Mycophenolic sodium                                                        | 754     | 699 [532-866]          | 7.9    |
| Sirolimus                                                                  | 649     | 558 [427-689]          | 16.2   |
| Dimethyl fumar                                                             | 8       | 6 [-9-21]              | 29.7   |
| Peginterferon alpha                                                        | 3       | 2 [-16-21]             | 20.5   |

|                                                |           |                                |        |
|------------------------------------------------|-----------|--------------------------------|--------|
| Fingolimod                                     | 3         | 1 [-3-6]                       | 106.1  |
| Interferon alpha                               | 1         | 4 [-3-11]                      | -74.9  |
| Thalidomide (Immunomodulating)                 | 1         | 3 [-4-9]                       | -64.7  |
| Rituximab                                      | 1         | 1 [-2-3]                       | 50.1   |
| 803 Sex hormones and antagonists in malignancy | 285,980   | 267,903[251,480-284,327]       | 6.7    |
| Letrozole                                      | 85,900    | 79,572 [74,822-84,323]         | 8      |
| Tamoxifen citrate                              | 61,679    | 56,043 [51,682-60,405]         | 10.1   |
| Anastrozole                                    | 52,272    | 47,788 [44,504-51,072]         | 9.4    |
| Bicalutamide                                   | 20,231    | 18,921 [17,527-20,316]         | 6.9    |
| Goserelin acetate                              | 19,705    | 20,351 [17,968-22,735]         | -3.2   |
| Leuprorelin acetate                            | 17,607    | 18,265 [16,426-20,104]         | -3.6   |
| Exemestane                                     | 13,031    | 12,382 [11,521-13,244]         | 5.2    |
| Triptorelin acetate                            | 7,078     | 3,250 [192-6,308]              | 117.8  |
| Cyproterone acetate                            | 2,668     | 2,587 [2,247-2,927]            | 3.1    |
| Degarelix                                      | 1,823     | 1,806 [1,621-1,990]            | 1      |
| Triptorelin embonate                           | 949       | 968 [793-1,142]                | -1.9   |
| Octreotide acetate                             | 581       | 561 [422-701]                  | 3.5    |
| Megestrol acetate                              | 474       | 339 [-98-775]                  | 40     |
| Diethylstilbestrol                             | 447       | 350 [48-652]                   | 27.7   |
| Lanreotide                                     | 360       | 358 [280-435]                  | 0.7    |
| Flutamide                                      | 52        | -36 [-259-188]                 | -246.3 |
| Fulvestrant                                    | 50        | 42 [16-68]                     | 18     |
| Toremifene citrate                             | 13        | 16 [1-32]                      | -21    |
| Buserelin                                      | 6         | 10 [1-19]                      | -39.1  |
| Enzalutamide                                   | 4         | 6 [-4-17]                      | -36.1  |
| 901 Anaemias and other blood disorders         | 1,689,675 | 1,664,694[1,547,043-1,782,344] | 1.5    |
| Folic acid                                     | 714,028   | 691,211 [629,956-752,465]      | 3.3    |
| Ferrous fumarate                               | 393,002   | 409,668 [337,560-481,775]      | -4.1   |

|                                          |         |                           |        |
|------------------------------------------|---------|---------------------------|--------|
| Ferrous sulfate                          | 246,105 | 220,463 [157,065-283,862] | 11.6   |
| Hydroxocobalamin                         | 198,544 | 238,383 [217,559-259,207] | -16.7  |
| Cyanocobalamin                           | 92,663  | 86,391 [80,122-92,659]    | 7.3    |
| Ferrous gluconate                        | 25,536  | 24,709 [21,718-27,700]    | 3.3    |
| Sodium feredetate                        | 14,087  | 17,103 [15,038-19,168]    | -17.6  |
| Iron and folic acid                      | 3,117   | 3,029 [2,524-3,535]       | 2.9    |
| Other oral iron preparations             | 1,385   | 1,244 [841-1,647]         | 11.3   |
| Ferric maltol                            | 424     | 503 [436-570]             | -15.8  |
| Darbepoetin alfa                         | 289     | 271 [63-479]              | 6.7    |
| Anagrelide hydrochloride                 | 138     | 125 [65-185]              | 10.3   |
| Iron dextran                             | 75      | 47 [-13-107]              | 58.7   |
| Epoetin alfa                             | 69      | 63 [27-99]                | 9.1    |
| Epoetin beta                             | 65      | 41 [-31-113]              | 56.9   |
| Deferasirox                              | 22      | 11 [-10-33]               | 99.5   |
| Methoxy polyethylene glycol-epoetin beta | 9       | 12 [-4-28]                | -25.1  |
| Deferiprone                              | 9       | 18 [-7-43]                | -49.5  |
| Filgrastim                               | 8       | 9 [-4-21]                 | -7     |
| Lenograstim                              | 7       | 3 [-7-14]                 | 102.2  |
| Iron sucrose                             | 5       | 5 [-5-15]                 | 2.1    |
| Eltrombopag                              | 5       | 9 [-3-21]                 | -46.6  |
| Iron carboxymaltose                      | 2       | -1 [-8-6]                 | -264.2 |
| Desferrioxamine mesilate                 | 1       | 0 [-5-6]                  | 218.3  |
| Epoetin zeta                             | 1       | 1 [-5-6]                  | 45.1   |
| 902 Fluids and electrolytes              | 96,543  | 100,891[88,286-113,496]   | -4.3   |
| Sodium bicarbonate                       | 42,634  | 41,325 [38,463-44,186]    | 3.2    |
| Sodium chloride                          | 30,296  | 26,375 [23,859-28,891]    | 14.9   |
| Water for injection                      | 18,009  | 16,503 [14,508-18,499]    | 9.1    |
| Oral rehydration salts                   | 16,235  | 24,966 [15,249-34,683]    | -35    |

|                                          |         |                           |       |
|------------------------------------------|---------|---------------------------|-------|
| Potassium chloride                       | 8,058   | 7,835 [5,366-10,303]      | 2.9   |
| Calcium polystyrene sulfonate            | 174     | 188 [137-239]             | -7.4  |
| Patiromer calcium                        | 27      | 35 [29-42]                | -23.5 |
| Potassium bicarbonate                    | 26      | 75 [32-118]               | -65.3 |
| Sodium polystyrene sulfonate             | 19      | 14 [0-28]                 | 37.8  |
| 904 Oral nutrition                       | 442,271 | 402,228[332,514-471,941]  | 10    |
| Enteral nutrition                        | 312,451 | 299,596 [253,864-345,328] | 4.3   |
| Other food for special diet preparations | 75,782  | 71,602 [60,146-83,059]    | 5.8   |
| Gluten free bread                        | 26,681  | 23,578 [15,101-32,055]    | 13.2  |
| Gluten free mixes                        | 10,709  | 9,094 [6,539-11,650]      | 17.8  |
| Low protein mixes                        | 1,445   | 1,540 [1,103-1,977]       | -6.2  |
| Gluten free low protein bread            | 1,203   | 982 [749-1,215]           | 22.5  |
| Gluten free low protein pasta            | 991     | 701 [580-822]             | 41.3  |
| Low protein pasta                        | 973     | 869 [695-1,044]           | 11.9  |
| Low protein biscuits                     | 892     | 898 [728-1,068]           | -0.7  |
| Maltodextrin                             | 789     | 662 [405-920]             | 19.1  |
| Low protein bread                        | 676     | 610 [410-810]             | 10.8  |
| Gluten free low protein biscuits         | 530     | 371 [201-540]             | 43    |
| Low protein meals                        | 391     | 299 [200-398]             | 30.9  |
| Gluten free low protein mixes            | 277     | 210 [146-274]             | 31.8  |
| Low protein cakes                        | 268     | 224 [134-313]             | 19.8  |
| Low protein cereals                      | 251     | 265 [197-333]             | -5.3  |
| Gluten free low protein grains flours    | 247     | 203 [159-246]             | 21.9  |
| Low protein desserts                     | 218     | 176 [107-246]             | 23.6  |
| Low protein grains flours                | 208     | 152 [104-199]             | 37.1  |
| Gluten free wheat free grains flours     | 146     | 89 [-155-333]             | 64.4  |
| Gluten free low protein cereals          | 137     | 116 [77-154]              | 18.3  |
| Low protein cooking aids                 | 127     | 96 [58-134]               | 32.3  |

|                                                 |        |                        |        |
|-------------------------------------------------|--------|------------------------|--------|
| Low protein snacks                              | 118    | 64 [34-94]             | 85     |
| Low protein miscellaneous                       | 60     | 54 [34-75]             | 10.4   |
| Gluten free low protein drink                   | 22     | 0 [0-0]                | Inf    |
| Gluten free pasta                               | 7      | -128 [-661-406]        | -105.5 |
| Low protein risotto                             | 7      | 5 [0-11]               | 31.2   |
| Gluten free wheat free biscuits                 | 4      | -1,351 [-3,499-796]    | -100.3 |
| Gluten free wheat free cereals                  | 3      | -1,602 [-6,731-3,527]  | -100.2 |
| Fructose                                        | 1      | 4 [1-7]                | -76    |
| Gluten free wheat free low protein cooking aids | 1      | 0 [-4-5]               | 110.1  |
| 905 Minerals                                    | 82,062 | 79,219 [72,645-85,792] | 3.6    |
| Calcium carbonate                               | 35,939 | 33,494 [30,658-36,331] | 7.3    |
| Sodium fluoride                                 | 11,853 | 11,244 [9,739-12,750]  | 5.4    |
| Sevelamer                                       | 6,541  | 6,614 [5,923-7,306]    | -1.1   |
| Calcium acetate                                 | 6,107  | 6,074 [5,427-6,721]    | 0.5    |
| Magnesium aspartate                             | 4,365  | 3,984 [3,572-4,396]    | 9.6    |
| Cinacalcet hydrochloride                        | 4,324  | 4,423 [4,025-4,820]    | -2.2   |
| Magnesium glycerophosphate                      | 3,738  | 3,706 [3,078-4,333]    | 0.9    |
| Zinc sulfate monohydrate                        | 2,202  | 2,075 [1,854-2,297]    | 6.1    |
| Other phosphate supplement preparations         | 1,369  | 1,382 [1,233-1,531]    | -0.9   |
| Other calcium supplement preparations           | 1,154  | 1,603 [942-2,263]      | -28    |
| Zinc sulfate                                    | 1,113  | 1,093 [902-1,284]      | 1.8    |
| Lanthanum carbonate                             | 1,097  | 1,177 [988-1,366]      | -6.8   |
| Calcium acetate magnesium carbonate             | 763    | 789 [667-912]          | -3.4   |
| Other selenium preparations                     | 655    | 685 [539-831]          | -4.4   |
| Magnesium citrate                               | 636    | 592 [476-708]          | 7.4    |
| Calcium lactate                                 | 288    | 272 [205-339]          | 5.8    |
| Calcium gluconate                               | 146    | 154 [100-207]          | -5     |
| Selenium                                        | 105    | 97 [58-135]            | 8.3    |

|                                        |           |                                 |       |
|----------------------------------------|-----------|---------------------------------|-------|
| Sucroferric oxyhydroxide               | 84        | 103 [72-135]                    | -18.8 |
| Other zinc preparations                | 81        | 80 [48-112]                     | 1.3   |
| Other magnesium preparations           | 71        | 95 [40-150]                     | -24.9 |
| Magnesium lactate                      | 60        | 50 [30-70]                      | 20.2  |
| Other mineral formulation preparations | 19        | 6 [0-13]                        | 196.8 |
| Sodium dihydrogen phosphate dihydrate  | 9         | 11 [-6-28]                      | -17.8 |
| Calcium chloride                       | 4         | 0 [-1-1]                        | 836.2 |
| Monobasic potassium phosphate          | 3         | 7 [-3-18]                       | -57.7 |
| Magnesium orotate                      | 1         | 6 [-5-18]                       | -84.4 |
| Other chromium preparations            | 1         | 1 [-3-5]                        | -14.6 |
| 906 Vitamins                           | 2,759,307 | 2,671,813[2,465,041-2,878,585]  | 3.3   |
| Colecalciferol                         | 2,153,620 | 2,073,483 [1,908,762-2,238,205] | 3.9   |
| Thiamine hydrochloride                 | 253,011   | 253,964 [236,506-271,422]       | -0.4  |
| Vitamin B compound                     | 138,457   | 145,894 [129,843-161,945]       | -5.1  |
| Other multivitamin preparations        | 79,712    | 78,635 [68,842-88,428]          | 1.4   |
| Alfacalcidol                           | 69,333    | 66,188 [61,219-71,156]          | 4.8   |
| Vitamins caps                          | 28,037    | 27,735 [22,795-32,675]          | 1.1   |
| Pyridoxine hydrochloride               | 8,694     | 8,703 [7,960-9,446]             | -0.1  |
| Ascorbic acid                          | 6,990     | 6,751 [5,008-8,494]             | 3.5   |
| Ergocalciferol                         | 6,897     | 5,841 [3,113-8,568]             | 18.1  |
| Calcitriol                             | 5,538     | 5,320 [4,652-5,988]             | 4.1   |
| Vitamin A                              | 3,123     | 3,012 [2,426-3,599]             | 3.7   |
| Vitamin E                              | 2,828     | 2,467 [1,927-3,008]             | 14.6  |
| Phytomenadione                         | 1,082     | 1,091 [828-1,354]               | -0.8  |
| Tocopheryl acetate                     | 908       | 747 [593-900]                   | 21.6  |
| Riboflavin                             | 814       | 836 [729-944]                   | -2.7  |
| Menadiol sodium phosphate              | 798       | 820 [267-1,374]                 | -2.7  |
| Cod liver oil                          | 626       | 528 [185-872]                   | 18.5  |

|                                                     |        |                        |       |
|-----------------------------------------------------|--------|------------------------|-------|
| Nicotinamide                                        | 524    | 529 [427-631]          | -0.9  |
| Other vitamin B preparations                        | 198    | 192 [140-244]          | 3.1   |
| Other vitamin A preparations 0906011                | 68     | 56 [23-88]             | 22.2  |
| Paricalcitol                                        | 58     | 56 [17-94]             | 4.1   |
| Vitamin B and C injection                           | 39     | 69 [3-135]             | -43.6 |
| Other vitamin B compound preparations               | 18     | 157 [-1-315]           | -88.5 |
| Betacarotene                                        | 10     | 4 [-4-11]              | 163.7 |
| Tocofersolan                                        | 6      | 4 [-13-22]             | 35.4  |
| Other vitamin C (Ascorbic acid) preparations        | 1      | 1 [-6-7]               | 20.4  |
| Pantothenic acid (Calcium pantothenate)             | 1      | 0 [-2-2]               | 286.6 |
| 908 Metabolic disorders                             | 467    | 452[339-565]           | 3.3   |
| Levocarnitine                                       | 301    | 270 [195-346]          | 11.4  |
| Sodium benzoate                                     | 78     | 68 [31-105]            | 14.4  |
| Zinc acetate                                        | 46     | 52 [18-85]             | -11.4 |
| Mercaptamine                                        | 30     | 39 [9-70]              | -23.6 |
| Betaine anhydrous                                   | 16     | 16 [-2-34]             | -0.5  |
| Sodium phenylbutyrate                               | 8      | 8 [-7-22]              | 2.6   |
| Trientine dihydrochloride                           | 6      | 10 [-25-46]            | -41.9 |
| Cholesterol                                         | 4      | 4 [-1-9]               | 6.1   |
| Sucrase                                             | 2      | 7 [-1-15]              | -72.8 |
| Nitisinone                                          | 1      | 0 [-3-3]               | -367  |
| 909 Foods                                           | 22,742 | 20,870[18,786-22,954]  | 9     |
|                                                     | 22,742 | 20,870 [18,786-22,954] | 9     |
| 910 Compound vitamin/mineral formulations           | 10,976 | 17,590[13,173-22,007]  | -37.6 |
|                                                     | 10,976 | 17,590 [13,173-22,007] | -37.6 |
| 911 Health supplements                              | 4,817  | 4,444[3,328-5,560]     | 8.4   |
| Other amino acid and nutritional agent preparations | 1,861  | 1,900 [1,687-2,113]    | -2.1  |
| Other enzyme preparations 0911020                   | 1,626  | 1,850 [1,071-2,628]    | -12.1 |

|                                                |           |                                 |       |
|------------------------------------------------|-----------|---------------------------------|-------|
| Other digestive aid preparations               | 1,197     | 1,205 [480-1,930]               | -0.7  |
| Taurine                                        | 133       | 121 [69-174]                    | 9.6   |
| 912 Other health supplements                   | 11,813    | 42,045 [24,130-59,960]          | -71.9 |
|                                                | 11,813    | 42,045 [24,130-59,960]          | -71.9 |
| 1001 Drugs used in rheumatic diseases and gout | 1,837,948 | 1,845,392 [1,674,029-2,016,754] | -0.4  |
| Naproxen                                       | 558,107   | 594,374 [513,234-675,513]       | -6.1  |
| Allopurinol                                    | 555,894   | 518,075 [482,430-553,721]       | 7.3   |
| Ibuprofen                                      | 416,800   | 442,759 [377,190-508,327]       | -5.9  |
| Methotrexate                                   | 187,380   | 172,841 [159,921-185,761]       | 8.4   |
| Hydroxychloroquine sulfate                     | 108,451   | 95,899 [87,361-104,437]         | 13.1  |
| Diclofenac sodium                              | 51,816    | 202,469 [138,066-266,872]       | -74.4 |
| Colchicine                                     | 43,074    | 42,938 [38,511-47,365]          | 0.3   |
| Meloxicam                                      | 39,292    | 39,166 [31,170-47,163]          | 0.3   |
| Etoricoxib                                     | 35,368    | 34,539 [31,477-37,601]          | 2.4   |
| Piroxicam                                      | 33,602    | 32,871 [22,181-43,560]          | 2.2   |
| Methylprednisolone acetate                     | 31,398    | 51,829 [45,508-58,151]          | -39.4 |
| Celecoxib                                      | 27,480    | 26,620 [23,973-29,267]          | 3.2   |
| Mefenamic acid                                 | 19,404    | 16,771 [9,220-24,323]           | 15.7  |
| Triamcinolone acetonide                        | 18,905    | 25,977 [22,685-29,269]          | -27.2 |
| Leflunomide                                    | 16,342    | 15,216 [13,972-16,460]          | 7.4   |
| Febuxostat                                     | 15,105    | 15,447 [14,009-16,885]          | -2.2  |
| Indometacin                                    | 9,996     | 9,726 [8,023-11,430]            | 2.8   |
| Etodolac                                       | 8,101     | 7,908 [6,535-9,282]             | 2.4   |
| Nabumetone                                     | 2,232     | 2,474 [2,097-2,850]             | -9.8  |
| Diclofenac potassium                           | 1,136     | 1,087 [400-1,773]               | 4.5   |
| Penicillamine                                  | 669       | 667 [540-794]                   | 0.3   |
| Aceclofenac                                    | 526       | 474 [309-638]                   | 11    |
| Triamcinolone hexacetonide                     | 228       | 439 [311-567]                   | -48   |



|                                            |         |                          |        |
|--------------------------------------------|---------|--------------------------|--------|
| Ibuprofen lysine                           | 179     | 175 [104-246]            | 2.2    |
| Flurbiprofen                               | 169     | 121 [-29-270]            | 40     |
| Sulindac                                   | 143     | 150 [108-192]            | -4.6   |
| Dexketoprofen                              | 97      | 88 [53-122]              | 10.8   |
| Tiaprofenic acid                           | 91      | 95 [61-128]              | -3.9   |
| Probenecid                                 | 67      | 65 [21-110]              | 2.5    |
| Tenoxicam                                  | 48      | 14 [-49-76]              | 252.4  |
| Benzbromarone                              | 25      | 18 [-6-41]               | 42.2   |
| Glucosamine hydrochloride (Rheumatic)      | 21      | -30 [-234-174]           | -169.3 |
| Sodium aurothiomalate                      | 13      | 143 [51-235]             | -90.9  |
| Apremilast                                 | 12      | 14 [5-24]                | -16    |
| Baricitinib                                | 11      | 12 [6-18]                | -8.4   |
| Phenylbutazone                             | 10      | 10 [-3-22]               | 3.3    |
| Sulfinpyrazone                             | 8       | -82 [-358-194]           | -109.7 |
| Adalimumab                                 | 7       | 6 [-25-37]               | 15.2   |
| Ibuprofen sodium dihydrate                 | 3       | 3 [-11-16]               | 12.8   |
| Tiopronin                                  | 2       | 4 [-6-13]                | -43.5  |
| Etanercept                                 | 2       | 6 [-32-43]               | -65.7  |
| Dexibuprofen                               | 1       | -9 [-95-77]              | -111   |
| Glucosamine sulfate (Rheumatic)            | 1       | 1 [-3-6]                 | -24.6  |
| 1002 Drugs used in neuromuscular disorders | 133,141 | 129,535[120,042-139,027] | 2.8    |
| Baclofen                                   | 101,280 | 99,343 [92,388-106,298]  | 2      |
| Methocarbamol                              | 12,802  | 13,255 [11,479-15,030]   | -3.4   |
| Tizanidine hydrochloride                   | 9,072   | 8,849 [8,081-9,617]      | 2.5    |
| Pyridostigmine bromide                     | 6,607   | 5,869 [5,437-6,302]      | 12.6   |
| Dantrolene sodium                          | 3,175   | 3,299 [2,959-3,640]      | -3.8   |
| Dronabinolcannabidiol                      | 128     | 119 [87-151]             | 7.6    |
| Neostigmine bromide                        | 76      | 87 [53-121]              | -12.3  |

|                                                                   |         |                           |        |
|-------------------------------------------------------------------|---------|---------------------------|--------|
| Other neuromuscularar transmisson preparations                    | 1       | -1 [-8-6]                 | -212.3 |
| 1003 Soft-tissue disorders and topical pain relief                | 562,921 | 586,896[525,965-647,827]  | -4.1   |
| Diclofenac diethyl                                                | 168,268 | 80,403 [4,755-156,052]    | 109.3  |
| Benzydamine hydrochloride                                         | 40,476  | 53,804 [40,737-66,871]    | -24.8  |
| Piroxicam                                                         | 33,602  | 32,871 [22,181-43,560]    | 2.2    |
| Heparinoid                                                        | 25,687  | 27,273 [21,326-33,220]    | -5.8   |
| Diethylamine salicylate                                           | 16,181  | 16,270 [10,913-21,626]    | -0.5   |
| Capsaicin                                                         | 15,772  | -9,131 [-24,647-6,385]    | -272.7 |
| Ketoprofen                                                        | 14,295  | 13,330 [10,904-15,757]    | 7.2    |
| Methyl salicylate                                                 | 2,184   | 2,970 [1,441-4,500]       | -26.5  |
| Felbinac                                                          | 303     | 526 [-5,449-6,502]        | -42.4  |
| Nicotinates                                                       | 125     | -578 [-5,615-4,459]       | -121.6 |
| Freeze sprays and gels                                            | 42      | -87 [-982-807]            | -148.1 |
| Arnica montana                                                    | 30      | 39 [3-74]                 | -22.4  |
| Methyl salicylatelevomenthol                                      | 14      | 17 [4-30]                 | -19.2  |
| Hyaluronidase                                                     | 2       | -2 [-9-5]                 | -196.6 |
| 1103 Anti-infective eye preparations                              | 114,012 | 137,297[114,197-160,397]  | -17    |
| Chloramphenicol                                                   | 93,278  | 114,805 [95,734-133,876]  | -18.8  |
| Fusidic acid                                                      | 81,671  | 96,697 [83,306-110,088]   | -15.5  |
| Gentamicin sulfate                                                | 3,317   | 2,237 [-827-5,301]        | 48.3   |
| Ganciclovir                                                       | 1,115   | 1,400 [554-2,246]         | -20.4  |
| Hydrocort sodiumphos                                              | 746     | 633 [532-733]             | 17.9   |
| Propamidine isetionate                                            | 37      | 55 [18-92]                | -32.7  |
| Dibrompropamidine isetionate                                      | 28      | 29 [-1-59]                | -3.2   |
| Cefuroxime sodium                                                 | 3       | 9 [-5-23]                 | -66.2  |
| 1104 Corticosteroids and other anti-inflammatory eye preparations | 162,146 | 160,865[109,334-212,395]  | 0.8    |
| Dexamethasone                                                     | 155,189 | 176,536 [151,911-201,161] | -12.1  |
| Sodium cromoglicate                                               | 61,434  | 60,639 [21,732-99,545]    | 1.3    |

|                                     |         |                           |        |
|-------------------------------------|---------|---------------------------|--------|
| Olopatadine                         | 14,879  | 14,214 [11,478-16,950]    | 4.7    |
| Prednisolone acetate                | 8,748   | 7,196 [4,920-9,471]       | 21.6   |
| Azelastine hydrochloride            | 8,291   | 6,722 [4,186-9,258]       | 23.3   |
| Fluorometholone                     | 6,210   | 5,188 [3,878-6,497]       | 19.7   |
| Prednisolone sodium phosphate       | 6,181   | 6,571 [5,206-7,936]       | -5.9   |
| Ciclosporin (Eye Anti Inflammatory) | 5,359   | 5,353 [4,859-5,848]       | 0.1    |
| Lodoxamide trometamol               | 1,660   | 1,475 [885-2,066]         | 12.5   |
| Ketotifen fumarate                  | 1,463   | 1,578 [1,141-2,016]       | -7.3   |
| Loteprednol etabonate               | 1,339   | 874 [-540-2,289]          | 53.1   |
| Antazoline                          | 979     | 932 [304-1,560]           | 5      |
| Nedocromil sodium                   | 387     | -2,584 [-11,379-6,212]    | -115   |
| Hamamalis                           | 203     | 175 [122-227]             | 16.2   |
| Epinastine hydrochloride            | 137     | 135 [55-215]              | 1.5    |
| Naphazoline hydrochloride           | 82      | 98 [68-128]               | -16.3  |
| Flurbiprofen sodium                 | 15      | 16 [3-28]                 | -4     |
| Rimexolone                          | 1       | -2 [-825-821]             | -145.3 |
| Emedastine                          | 1       | -148 [-422-125]           | -100.7 |
| 1105 Mydriatics and cytoplegics     | 6,512   | 5,998[5,380-6,615]        | 8.6    |
| Atropine sulfate                    | 4,725   | 4,561 [3,991-5,131]       | 3.6    |
| Cyclopentolate hydrochloride        | 1,654   | 1,442 [1,226-1,659]       | 14.7   |
| Tropicamide                         | 157     | 107 [62-153]              | 46     |
| Phenylephrine hydrochloride         | 10      | 29 [-6-65]                | -66    |
| 1106 Treatment of glaucoma          | 870,092 | 803,945[748,131-859,759]  | 8.2    |
| Latanoprost                         | 257,135 | 233,334 [217,737-248,930] | 10.2   |
| Bimatoprost                         | 102,822 | 95,845 [87,049-104,641]   | 7.3    |
| Timolol and bimatoprost             | 91,103  | 85,791 [79,061-92,520]    | 6.2    |
| Brinzolamide                        | 90,763  | 84,610 [76,890-92,329]    | 7.3    |
| Dorzolamide and timolol             | 68,224  | 62,224 [57,507-66,941]    | 9.6    |

|                                               |         |                           |       |
|-----------------------------------------------|---------|---------------------------|-------|
| Timolol                                       | 53,001  | 46,497 [40,518-52,477]    | 14    |
| Travoprost                                    | 35,223  | 32,254 [28,594-35,914]    | 9.2   |
| Dorzolamide                                   | 32,359  | 30,215 [28,178-32,251]    | 7.1   |
| Latanoprost and timolol                       | 29,853  | 25,984 [23,805-28,163]    | 14.9  |
| Brimonidine tartrate                          | 25,275  | 24,472 [22,127-26,816]    | 3.3   |
| Timolol and travoprost                        | 20,126  | 18,878 [17,213-20,543]    | 6.6   |
| Brinzolamide and timolol                      | 17,686  | 19,632 [15,067-24,196]    | -9.9  |
| Brinzolamidebrimonidine                       | 17,226  | 16,532 [14,454-18,610]    | 4.2   |
| Acetazolamide                                 | 8,629   | 7,951 [7,262-8,640]       | 8.5   |
| Tafluprost                                    | 7,126   | 6,788 [5,926-7,649]       | 5     |
| Timolol and brimonidine                       | 5,238   | 4,749 [4,096-5,401]       | 10.3  |
| Pilocarpine hydrochloride                     | 5,000   | 4,658 [4,147-5,170]       | 7.3   |
| Tafluprost and timolol                        | 2,658   | 2,748 [2,438-3,057]       | -3.3  |
| Betaxolol                                     | 1,915   | 1,805 [1,309-2,301]       | 6.1   |
| Levobunolol hydrochloride                     | 1,027   | 1,713 [999-2,427]         | -40.1 |
| Pilocarpine nitrate                           | 616     | 557 [371-742]             | 10.6  |
| 1107 Local anaesthetics (eye)                 | 58      | 60[-19-139]               | -3    |
| Oxybuprocaine hydrochloride                   | 24      | 15 [-10-41]               | 55.9  |
| Tetracaine hydrochloride                      | 18      | 25 [-22-72]               | -28.3 |
| Proxymetacaine hydrochloride                  | 14      | 19 [-49-86]               | -24.4 |
| 1108 Miscellaneous ophthalmic preparations    | 367,831 | 332,734[273,857-391,610]  | 10.5  |
| Hypromellose                                  | 164,774 | 156,501 [138,626-174,376] | 5.3   |
| Carbomer 940980                               | 124,138 | 119,500 [97,720-141,279]  | 3.9   |
| Carmellose sodium                             | 48,766  | 42,778 [28,291-57,265]    | 14    |
| Liquid paraffin                               | 7,599   | 5,512 [-41,221-52,246]    | 37.9  |
| Acetylcysteine                                | 7,488   | 6,593 [5,511-7,676]       | 13.6  |
| Ketorolac trometamol                          | 4,065   | 4,195 [3,407-4,983]       | -3.1  |
| Other eye tearlubricantstringent preparations | 3,259   | 3,477 [2,308-4,646]       | -6.3  |

|                                         |         |                           |        |
|-----------------------------------------|---------|---------------------------|--------|
| Apraclonidine                           | 3,231   | 3,004 [2,548-3,459]       | 7.6    |
| Paraffin soft yellow                    | 2,917   | 2,568 [-1,504-6,639]      | 13.6   |
| Carbomer 974P                           | 2,606   | 2,648 [1,913-3,384]       | -1.6   |
| Hytellose                               | 2,363   | 2,133 [1,856-2,411]       | 10.8   |
| Nepafenac                               | 1,514   | 1,753 [1,490-2,016]       | -13.6  |
| Carbomer                                | 1,240   | 1,237 [978-1,497]         | 0.2    |
| Bromfenac                               | 834     | 839 [618-1,059]           | -0.6   |
| Moxifloxacin hydrochloride              | 288     | 263 [199-326]             | 9.6    |
| Fluorescein sodium                      | 56      | 87 [23-151]               | -35.8  |
| Mercaptamine hydrochloride              | 12      | 14 [-4-31]                | -13.6  |
| Povidone iodine                         | 7       | 5 [-2-11]                 | 53.5   |
| Idebenone                               | 4       | 4 [-3-10]                 | 8.5    |
| Polyvinyl alcohol                       | 1       | -1,741 [-7,771-4,289]     | -100.1 |
| Disodium edetate                        | 1       | 0 [-4-5]                  | 190.4  |
| 1201 Drugs acting on the ear            | 126,189 | 145,263[126,542-163,984]  | -13.1  |
| Docusate sodium                         | 204,516 | 204,233 [191,478-216,988] | 0.1    |
| Hydrocortisone acetate                  | 39,530  | 40,304 [21,111-59,497]    | -1.9   |
| Acetic acid                             | 5,509   | 6,384 [4,534-8,234]       | -13.7  |
| Ciprofloxaindexameth                    | 4,338   | 5,276 [3,412-7,140]       | -17.8  |
| Dexamethasone sodium metasulphobenzoate | 3,590   | 8,132 [-15,682-31,947]    | -55.9  |
| Flumetasone pivalate                    | 1,652   | 1,737 [-6,586-10,061]     | -4.9   |
| Urea hydrogen peroxide                  | 1,489   | 2,197 [1,698-2,695]       | -32.2  |
| Oils for the ear                        | 150     | -912 [-1,751--72]         | -116.5 |
| Ciprofloxacinfluocinolone               | 113     | 189 [126-252]             | -40.2  |
| Other otitis external preparations      | 6       | 7 [0-14]                  | -8.9   |
| Aluminium acetate                       | 4       | -1 [-12-9]                | -435.6 |
| 1202 Drugs acting on the nose           | 722,546 | 661,210[585,094-737,325]  | 9.3    |
| Mometasone furoate                      | 282,061 | 263,412 [234,231-292,592] | 7.1    |

|                                                         |         |                           |        |
|---------------------------------------------------------|---------|---------------------------|--------|
| Fluticasone furoate                                     | 144,054 | 128,327 [107,320-149,334] | 12.3   |
| Fluticasone propionate (Nasal)                          | 83,919  | 74,519 [66,184-82,855]    | 12.6   |
| Neomycin sulfate                                        | 33,824  | 43,058 [34,365-51,752]    | -21.4  |
| Fluticasone propionateazelaastine hydrochloride (Nasal) | 31,087  | 29,223 [26,130-32,315]    | 6.4    |
| Sodium chloride                                         | 30,296  | 26,375 [23,859-28,891]    | 14.9   |
| Triamcinolone acetonide                                 | 18,905  | 25,977 [22,685-29,269]    | -27.2  |
| Mupirocin                                               | 11,746  | 11,819 [7,564-16,075]     | -0.6   |
| Xylometazoline hydrochloride                            | 2,510   | 2,939 [1,364-4,514]       | -14.6  |
| Other topical nasal decongestant preparations           | 11      | 14 [-6-35]                | -23.3  |
| Xylometazoline hydrochlorideipratropium bromide         | 2       | 0 [0-0]                   | Inf    |
| 1203 Drugs acting on the oropharynx                     | 77,053  | 90,604[72,626-108,582]    | -15    |
| Benzylamine hydrochloride                               | 40,476  | 53,804 [40,737-66,871]    | -24.8  |
| Chlorhexidine gluconate                                 | 30,377  | 30,650 [26,625-34,676]    | -0.9   |
| Miconazole                                              | 12,689  | 13,116 [11,581-14,651]    | -3.3   |
| Pilocarpine hydrochloride                               | 5,000   | 4,658 [4,147-5,170]       | 7.3    |
| Hydrocortisone (Sodium succinate)                       | 3,423   | 4,125 [3,411-4,840]       | -17    |
| Choline salicylate                                      | 1,219   | 1,313 [905-1,721]         | -7.2   |
| Other treatment of dry mouth preparations               | 746     | 715 [630-800]             | 4.3    |
| Artificial saliva                                       | 589     | -394 [-4,783-3,995]       | -249.4 |
| Benzocaine                                              | 414     | 666 [392-939]             | -37.8  |
| Flubiprofen                                             | 106     | 448 [111-784]             | -76.3  |
| Dequalinium chloride                                    | 92      | 110 [27-193]              | -16.4  |
| Sodium benzoate                                         | 78      | 68 [31-105]               | 14.4   |
| Other mouth wash, gargle and dentifrice preparations    | 56      | 51 [29-73]                | 9.6    |
| Hexetidine                                              | 52      | 243 [-650-1,135]          | -78.6  |
| Amylmetacresol                                          | 41      | 21 [-80-122]              | 96.2   |
| Cetylpyridinium chloride                                | 31      | 44 [14-74]                | -30.1  |
| Tetracaine hydrochloride                                | 18      | 25 [-22-72]               | -28.3  |

|                                                     |         |                           |         |
|-----------------------------------------------------|---------|---------------------------|---------|
| Diclofenac sod                                      | 8       | 4 [-23-31]                | 100     |
| Amphotericin                                        | 8       | 6 [-5-17]                 | 32.8    |
| Hexylresorcinol                                     | 7       | 6 [-20-32]                | 15      |
| Other oral ulceration and inflammation preparations | 2       | 2 [-6-10]                 | -4      |
| Dichlorobenzyl alcoholamylmetacresol                | 1       | 0 [-12-12]                | 868.4   |
| Other lozenge and spray preparations                | 1       | 2 [-3-6]                  | -46.4   |
| 1301 Management of skin conditions                  | 5,465   | 5,432[4,133-6,730]        | 0.6     |
| Cetomacrogol                                        | 5,401   | 5,426 [4,191-6,661]       | -0.5    |
| Wool fat                                            | 53      | 48 [-73-169]              | 10.4    |
| Wool fat hydrous                                    | 6       | 11 [-4-26]                | -45.3   |
| Paraffin hard                                       | 3       | 4 [-4-12]                 | -25.8   |
| Vehicles                                            | 1       | -1 [-14-12]               | -234.8  |
| Other vehicle and emulsifying agent preparations    | 1       | 0 [-2-2]                  | -4417.9 |
| 1302 Emollient and barrier preparations             | 659,076 | 642,118[532,118-752,119]  | 2.6     |
| Other emollient preparations                        | 455,969 | 434,264 [367,045-501,484] | 5       |
| Emollient bath and shower preparations              | 67,355  | 63,397 [45,451-81,342]    | 6.2     |
| Light liquid paraffin                               | 43,114  | 47,177 [27,267-67,088]    | -8.6    |
| Urea                                                | 40,483  | 40,464 [35,743-45,186]    | 0       |
| Dimeticone (Barrier)                                | 17,725  | 20,588 [14,920-26,256]    | -13.9   |
| Emulsifying wax                                     | 6,942   | 7,123 [3,500-10,746]      | -2.5    |
| Benzalkonium chloride                               | 5,767   | 5,843 [4,595-7,092]       | -1.3    |
| Other barrier preparations                          | 3,936   | 4,665 [3,765-5,565]       | -15.6   |
| Wool alcohols                                       | 1,814   | 2,351 [-27-4,729]         | -22.8   |
| Paraffin soft white                                 | 1,018   | 860 [475-1,246]           | 18.3    |
| Dexpanthenol                                        | 927     | 982 [771-1,192]           | -5.6    |
| Chlohexidine gluconate (Emollient)                  | 101     | -15 [-300-270]            | -767.9  |
| Other dusting powder preparations                   | 2       | -28 [-118-63]             | -107.2  |
| Zinc paste                                          | 1       | -86 [-438-265]            | -101.2  |

|                                                   |         |                            |         |
|---------------------------------------------------|---------|----------------------------|---------|
| 1303 Topical local anaesthetics and antipruritics | 21,665  | 22,929[19,337-26,522]      | -5.5    |
| Menthol                                           | 9,532   | 10,165 [9,262-11,069]      | -6.2    |
| Crotamiton                                        | 7,875   | 7,868 [4,755-10,980]       | 0.1     |
| Calamine                                          | 2,822   | 3,780 [1,426-6,135]        | -25.4   |
| Doxepin hydrochloride                             | 279     | -8 [-172-156]              | -3638.8 |
| Mepyramine maleate                                | 74      | 5 [-177-188]               | 1257    |
| 1304 Topical corticosteroids                      | 943,166 | 971,810[866,774-1,076,846] | -2.9    |
| Betamethasone valerate                            | 268,215 | 268,299 [238,269-298,329]  | 0       |
| Clobetasone butyrate                              | 115,228 | 101,223 [44,301-158,145]   | 13.8    |
| Clobetasol propionate                             | 78,226  | 75,581 [69,176-81,985]     | 3.5     |
| Betamethasone esters                              | 31,595  | 32,775 [28,665-36,885]     | -3.6    |
| Fluocinolone acetonide                            | 8,045   | 11,748 [5,332-18,165]      | -31.5   |
| Fludroxycortide                                   | 3,964   | 3,335 [231-6,439]          | 18.9    |
| Hydrocortisone butyrate                           | 3,219   | 3,867 [2,039-5,696]        | -16.8   |
| Fluocinonide                                      | 970     | 930 [615-1,245]            | 4.3     |
| Diflucortolone valerate                           | 852     | 1,539 [927-2,152]          | -44.6   |
| Fluticasone propionate (Topical)                  | 692     | 620 [83-1,158]             | 11.5    |
| Other topical corticosteroid preparations         | 28      | 39 [18-60]                 | -28.7   |
| Alclometasone dipropionate                        | 1       | 2,852 [-2,456-8,159]       | -100    |
| 1305 Preparations fo reczema and psoriasis        | 139,919 | 135,139[124,512-145,766]   | 3.5     |
| Calcipotriol                                      | 99,952  | 97,619 [90,240-104,998]    | 2.4     |
| Cocois                                            | 7,817   | 7,753 [6,965-8,541]        | 0.8     |
| Tars                                              | 4,875   | 4,494 [3,744-5,243]        | 8.5     |
| Pimecrolimus                                      | 4,499   | 4,440 [3,529-5,352]        | 1.3     |
| Acitretin                                         | 804     | 885 [755-1,014]            | -9.1    |
| Gamolenic acid                                    | 800     | 755 [563-946]              | 6       |
| Tacalcitol                                        | 510     | 543 [151-934]              | -6      |
| Dithranol                                         | 433     | 432 [309-554]              | 0.3     |



|                                                 |         |                          |       |
|-------------------------------------------------|---------|--------------------------|-------|
| Other psoriasis preparations                    | 146     | 334 [256-412]            | -56.3 |
| Other eczema preparations                       | 32      | 41 [-26-107]             | -21.3 |
| Alitretinoin                                    | 18      | 18 [2-34]                | 0.8   |
| Tazarotene                                      | 15      | 9 [-96-114]              | 64.1  |
| Ustekinumab (Psoriasis)                         | 5       | 2 [-1-4]                 | 226   |
| Ichthammol                                      | 4       | 2 [-7-12]                | 87.8  |
| Coal tar and corticosteroid preparations        | 1       | -1 [-19-17]              | -181  |
| 1306 Acne and rosacea                           | 140,685 | 153,190[135,548-170,832] | -8.2  |
| Erythromycin                                    | 52,987  | 55,394 [35,770-75,018]   | -4.3  |
| Benzoyl peroxide and clindamycin phosphate      | 45,761  | 50,351 [36,796-63,906]   | -9.1  |
| Adapalene and benzoyl peroxide                  | 17,206  | 19,359 [16,828-21,889]   | -11.1 |
| Adapalene                                       | 13,889  | 15,515 [13,626-17,404]   | -10.5 |
| Clindamycin phosphate                           | 10,112  | 10,603 [8,034-13,173]    | -4.6  |
| Benzoyl peroxide                                | 9,660   | 11,564 [9,706-13,422]    | -16.5 |
| Co-cyprindiol (Cyprote acetateethinylestradiol) | 7,978   | 7,125 [5,500-8,751]      | 12    |
| Azelaic acid                                    | 7,694   | 8,240 [7,027-9,452]      | -6.6  |
| Ivermectin                                      | 5,753   | 6,113 [5,465-6,761]      | -5.9  |
| Isotretinoin                                    | 4,238   | 4,948 [3,296-6,599]      | -14.3 |
| Clindamycintretinoin                            | 2,501   | 2,590 [1,844-3,336]      | -3.4  |
| Brimonidine tart (Rosacea)                      | 800     | 912 [629-1,195]          | -12.3 |
| Nicotinamide                                    | 524     | 529 [427-631]            | -0.9  |
| Tretinoin                                       | 13      | 8 [-6-22]                | 57.2  |
| Sulfur                                          | 10      | 5 [-6-16]                | 91.3  |
| 1307 Preparations for warts and calluses        | 9,553   | 11,849[7,522-16,176]     | -19.4 |
| Salicylic acid                                  | 6,482   | 8,411 [4,418-12,405]     | -22.9 |
| Imiquimod                                       | 2,128   | 2,320 [1,991-2,649]      | -8.3  |
| Silver nitrate                                  | 614     | 801 [619-983]            | -23.3 |
| Podophyllotoxin                                 | 454     | 529 [363-695]            | -14.2 |

|                                                                   |         |                          |        |
|-------------------------------------------------------------------|---------|--------------------------|--------|
| Glutaraldehyde                                                    | 82      | 134 [50-217]             | -38.6  |
| Formaldehyde                                                      | 12      | 15 [-13-44]              | -22.4  |
| Camellia sinensis extract                                         | 4       | 8 [3-12]                 | -47.9  |
| Podophyllum resin                                                 | 1       | 0 [-3-3]                 | -697.2 |
| 1308 Sunscreens and camouflagers                                  | 27,677  | 33,915[27,768-40,062]    | -18.4  |
| Fluorouracil (Sunscreen)                                          | 11,787  | 14,488 [12,956-16,021]   | -18.6  |
| Other suncreening preparations                                    | 4,161   | 3,181 [-1,015-7,377]     | 30.8   |
| Other camouflage preparations                                     | 3,456   | 3,405 [2,885-3,925]      | 1.5    |
| Ingenol mebutate                                                  | 61      | 2,305 [1,522-3,088]      | -97.4  |
| Titanium dioxide                                                  | 10      | 17 [-30-64]              | -41.2  |
| 1309 Shampoo and other preparations for scalp and hair conditions | 111,446 | 112,904[100,161-125,647] | -1.3   |
| Ketoconazole                                                      | 55,567  | 62,002 [55,391-68,612]   | -10.4  |
| Coal tar                                                          | 50,777  | 48,680 [43,710-53,651]   | 4.3    |
| Benzalkonium chloride                                             | 5,767   | 5,843 [4,595-7,092]      | -1.3   |
| Selenium sulfide                                                  | 2,601   | 1,936 [-493-4,365]       | 34.3   |
| Eflornithine monohydrate chloride                                 | 2,221   | 2,077 [1,345-2,809]      | 6.9    |
| Alkyl sulfate                                                     | 150     | 279 [11-547]             | -46.2  |
| Other shampoo and scalp preparations                              | 8       | 7 [-1-15]                | 12.6   |
| 1310 Anti-infective skin preparations                             | 245,235 | 284,594[250,478-318,710] | -13.8  |
| Miconazole nitrate                                                | 29,732  | 36,123 [30,660-41,586]   | -17.7  |
| Mupirocin                                                         | 11,746  | 11,819 [7,564-16,075]    | -0.6   |
| Amorolfine hydrochloride                                          | 11,082  | 11,698 [8,667-14,730]    | -5.3   |
| Permethrin                                                        | 9,686   | 13,184 [9,939-16,429]    | -26.5  |
| Sodium fusidate                                                   | 2,485   | 2,834 [2,125-3,544]      | -12.3  |
| Silver sulfadiazine                                               | 2,475   | 1,793 [857-2,729]        | 38     |
| Malathion                                                         | 1,290   | 1,087 [-676-2,850]       | 18.7   |
| Tioconazole                                                       | 1,149   | 1,075 [499-1,652]        | 6.9    |
| Hydrogen peroxide                                                 | 910     | 805 [624-985]            | 13.1   |

|                                                   |        |                        |          |
|---------------------------------------------------|--------|------------------------|----------|
| Cetrimide                                         | 501    | 335 [-228-898]         | 49.5     |
| Magnesium sulfate                                 | 392    | 439 [287-591]          | -10.6    |
| Dimeticone (Parasitocidal)                        | 359    | -49 [-830-732]         | -839     |
| Undecenoates                                      | 167    | 175 [93-258]           | -4.8     |
| Penciclovir                                       | 107    | 86 [24-149]            | 24       |
| Dibrompropamide isetionate                        | 28     | 29 [-1-59]             | -3.2     |
| Bifonazole                                        | 14     | 13 [-3-28]             | 8.6      |
| Tolnaftate                                        | 11     | 13 [-13-38]            | -12.3    |
| Other antiviral preparations                      | 10     | 12 [-3-27]             | -16.1    |
| Polymyxins                                        | 7      | 17 [-705-738]          | -58.4    |
| Chlorhex hydrochloride                            | 5      | 8 [-1-18]              | -39.9    |
| Benzyl benzoate                                   | 3      | 1 [-8-11]              | 111.3    |
| Other minor cut and abrasion preparations         | 2      | 11 [-10-31]            | -81.3    |
| 1311 Skin cleansers, antiseptics, and desloughing | 18,346 | 18,756[16,645-20,867]  | -2.2     |
| Chlorhexidine gluconate                           | 30,377 | 30,650 [26,625-34,676] | -0.9     |
| Alkyl sulphate                                    | 1,886  | 2,133 [1,817-2,448]    | -11.6    |
| Potassium permanganate                            | 766    | 787 [604-970]          | -2.7     |
| Iodine compounds                                  | 401    | -3 [-484-479]          | -15071.9 |
| Alcohol                                           | 133    | 135 [80-190]           | -1.4     |
| Chlorhexidine acetate                             | 97     | 82 [-73-237]           | 18       |
| Sodium hypochlorite                               | 55     | 47 [26-68]             | 16.2     |
| Ster larvae                                       | 37     | 56 [16-96]             | -34.2    |
| Chloroxylenol                                     | 25     | 43 [9-78]              | -42.4    |
| Halogenated phenols with phenol                   | 13     | 8 [-14-30]             | 60       |
| Isopropyl alcohol                                 | 11     | 5 [-10-20]             | 114.3    |
| Triclosan                                         | 9      | -45 [-126-37]          | -120.2   |
| Other alcohol and saline preparations             | 3      | 5 [0-11]               | -44.8    |
| 1312 Antiperspirants                              | 3,396  | 3,679[2,335-5,023]     | -7.7     |

|                                             |         |                             |       |
|---------------------------------------------|---------|-----------------------------|-------|
| Aluminium chloride                          | 3,373   | 3,685 [2,356-5,013]         | -8.5  |
| Other antiperspirant preparations           | 1       | 1 [-12-15]                  | -26.1 |
| 1313 Wound management products              | 1,511   | 1,411[1,082-1,739]          | 7.1   |
|                                             | 1,510   | 1,411 [1,082-1,740]         | 7     |
| 1314 Topical circulatory preparations       | 6,781   | 7,433[6,486-8,381]          | -8.8  |
|                                             | 8       | 6 [1-11]                    | 31.9  |
| 1315 Miscellaneous topical preparations     | 133     | 134[59-208]                 | -0.4  |
| Other miscellaneous topical preparations    | 84      | 99 [45-152]                 | -14.9 |
| Depigmenting agents                         | 49      | 64 [30-97]                  | -23.1 |
| 1404 Vaccines and antisera                  | 301,608 | 357,500[-431,788-1,146,789] | -15.6 |
| Influenza                                   | 165,578 | 134,941 [-634,430-904,313]  | 22.7  |
| Pneumococcal                                | 35,726  | 46,571 [11,828-81,315]      | -23.3 |
| Typhoid                                     | 30,568  | 61,552 [44,035-79,069]      | -50.3 |
| Diphtheria                                  | 26,427  | 44,589 [36,790-52,387]      | -40.7 |
| Hepatitis A                                 | 22,852  | 46,648 [25,044-68,252]      | -51   |
| Hepatitis Atyphoid vaccine                  | 9,513   | 18,123 [123-36,123]         | -47.5 |
| Hepatitis B                                 | 5,617   | 7,750 [2,379-13,120]        | -27.5 |
| Hepatitis Ahepatitis B                      | 3,566   | 8,336 [1,428-15,245]        | -57.2 |
| Meningococcal A + C + W135 + Y vaccine      | 424     | 1,535 [-7,702-10,773]       | -72.4 |
| Measles, mumps and rubella vaccine          | 382     | 598 [475-721]               | -36.1 |
| Shingles (HZ)                               | 363     | 496 [-516-1,509]            | -26.9 |
| Cholera                                     | 308     | 590 [318-862]               | -47.8 |
| Meningococcal B vaccine                     | 77      | 834 [-5,906-7,575]          | -90.8 |
| Haemophilus influenzae Bmeningococcal C     | 56      | 61 [-2-124]                 | -7.6  |
| Varicella vaccine live                      | 54      | 121 [39-203]                | -55.4 |
| Human papillomavirus (Type 6,11,16,18)      | 40      | 52 [14-90]                  | -23.4 |
| Rabies                                      | 35      | 23 [-69-115]                | 54.6  |
| Humpapvirus(Type 6,11,16,18,31,33,45,52,58) | 11      | 20 [13-27]                  | -46   |

|                                                      |        |                           |        |
|------------------------------------------------------|--------|---------------------------|--------|
| Yellow fever                                         | 5      | 17 [0-35]                 | -71.3  |
| Rotavirus                                            | 3      | 6 [-24-36]                | -46.8  |
| Human papillomavirus (Type 16,18)                    | 2      | 2 [-8-11]                 | 32.9   |
| Japanese encephalitis vaccine (Inactivated,adsorbed) | 1      | 0 [-16-15]                | -328.6 |
| 1501 General anaesthesia                             | 32,029 | 29,527[25,364-33,689]     | 8.5    |
| Midazolam hydrochloride                              | 29,686 | 26,470 [22,600-30,339]    | 12.2   |
| Hyoscine hydrobromide                                | 8,832  | 9,331 [5,721-12,941]      | -5.3   |
| Alfentanil hydrochloride                             | 423    | 415 [310-519]             | 2      |
| Fentanyl citrate                                     | 32     | 35 [-6-75]                | -8.1   |
| Ketamine                                             | 19     | 41 [18-63]                | -53.2  |
| Parecoxib sodium                                     | 5      | 6 [-1-14]                 | -21.9  |
| Nitrous oxide                                        | 4      | 11 [-61-83]               | -64.2  |
| 1502 Local anaesthesia                               | 89,084 | 121,931[109,542-134,320]  | -26.9  |
| Lidocaine hydrochloride                              | 84,314 | 115,842 [104,025-127,658] | -27.2  |
| Lidocaine                                            | 4,987  | 5,139 [4,408-5,870]       | -3     |
| Tetracaine                                           | 1,104  | 1,625 [696-2,553]         | -32    |
| Bupivacaine hydrochloride                            | 992    | 1,739 [1,344-2,133]       | -42.9  |
| Mepivacaine hydrochloride                            | 158    | 308 [140-476]             | -48.6  |
| Prilocaine hydrochloride                             | 12     | 24 [-8-55]                | -49    |
| Cocaine                                              | 3      | 3 [-4-10]                 | -7.4   |
| Levobupivacaine hydrochloride                        | 2      | 8 [-25-41]                | -75.7  |
| 1901 Alcohol, wines, and spirits                     | 0      | 0[-3-3]                   | -100   |
| 1902 Selective preparations                          | 42,135 | 38,918[20,481-57,355]     | 8.3    |
| Other toiletry preparations                          | 28,292 | 28,896 [21,638-36,155]    | -2.1   |
| Other individually formulated bought in preparations | 13,458 | 7,361 [-10,960-25,683]    | 82.8   |
| Charcoal                                             | 159    | 171 [118-223]             | -6.8   |
| Naloxone hydrochloride                               | 111    | 65 [-38-167]              | 72     |
| Other homeopathic preparations                       | 82     | 111 [-41-263]             | -26.4  |

|                                                           |        |                        |       |
|-----------------------------------------------------------|--------|------------------------|-------|
| Other household and over the counter preparations         | 2      | 4 [-1-9]               | -44.2 |
| 1904 Single substances                                    | 177    | 208[94-322]            | -14.9 |
|                                                           | 177    | 208 [94-322]           | -14.9 |
| 1905 Other preparations                                   | 1,004  | 1,138[802-1,474]       | -11.7 |
|                                                           | 1,004  | 1,138 [802-1,474]      | -11.7 |
| 1906 Acids                                                | 513    | 567[261-873]           | -9.6  |
| Other oil preparations                                    | 343    | 393 [137-648]          | -12.6 |
| Other concentrated water preparations                     | 164    | 183 [52-314]           | -10.4 |
| Other tincture preparations                               | 3      | 2 [-8-11]              | 53.8  |
| Other acid preparations                                   | 2      | 1 [-2-4]               | 96.1  |
| 1907 Base/Dil/Susp agents/Stabilisers                     | 46,951 | 46,807[42,476-51,139]  | 0.3   |
|                                                           | 46,951 | 46,807 [42,476-51,139] | 0.3   |
| 1909 Disinfectants, preservatives, and stabilising agents | 3      | 1[-4-6]                | 247.2 |
|                                                           | 3      | 1 [-4-6]               | 247.2 |
| 1913 Cordials/soft drinks                                 | 174    | 239[135-343]           | -27.2 |
|                                                           | 174    | 239 [135-343]          | -27.2 |
| 1914 Waters                                               | 946    | 891[768-1,014]         | 6.2   |
| Other purified water preparations                         | 854    | 768 [667-870]          | 11.1  |
| Sterile water                                             | 92     | 128 [57-198]           | -27.9 |
