# Supplementary material for: Analysis of primary care prescription trends in England during the COVID-19 pandemic compared against a predictive model
Source: HighWire-hosted journal article supplement (doi:10.1136/fmch-2021-001143), 2021-08-01
Supplement: fmch-2021-001143supp003_data_supplement.pdf [file fmch-2021-001143supp003_data_supplement.pdf]

**Supplementary Table 3** - Overall BNF code and drug prescribing for the month of April 2020. Absolute number of prescribed items is reported as  $N_{obs}$ , forecast number of prescribed items and 99% prediction intervals are reported as  $N_{for}$  [99%PI], and per cent difference from prediction is reported as % difference.

| Section/Drug Name                                           | $N_{obs}$ | $N_{for}$ [99CI]          | % difference |
|-------------------------------------------------------------|-----------|---------------------------|--------------|
| 101 Dyspepsia and Gastro-Oesophageal Reflux Disease         | 358,716   | 337,253[302,072-372,434]  | 6.4          |
| Alginic acid compound preparations                          | 348,072   | 325,023 [290,821-359,224] | 7.1          |
| Co-magaldrox (Magnesiumaluminium hydroxide)                 | 4,242     | 4,068 [2,955-5,180]       | 4.3          |
| Simeticone                                                  | 1,729     | 1,448 [857-2,039]         | 19.4         |
| Magnesium hydroxide                                         | 1,456     | 2,008 [471-3,545]         | -27.5        |
| Aluminium and magnesium and activated simeticone            | 1,124     | 1,015 [541-1,488]         | 10.8         |
| Magnesium oxide                                             | 347       | 343 [250-436]             | 1.3          |
| Compound alginates and proprietary indigestion preparations | 375       | 327 [230-423]             | 14.8         |
| Magnesium trisilicate                                       | 312       | 341 [-209-890]            | -8.4         |
| Aluminium and magnesium and oxetacaine                      | 232       | 227 [151-304]             | 2.1          |
| Aluminium hydroxide                                         | 25        | -174 [-490-143]           | -114.4       |
| Magnesium carbonate                                         | 27        | 37 [14-60]                | -26.9        |
| Co-simalcite (Simeticonehydrotalcite)                       | 12        | -39 [-201-123]            | -130.9       |
| Gripe mixtures                                              | 2         | -3 [-16-9]                | -162         |
| 102 Antispasmodics & Other Drugs Altering Gut Motility      | 389,747   | 384,600[352,525-416,674]  | 1.3          |
| Mebeverine hydrochloride                                    | 171,906   | 173,110 [158,702-187,518] | -0.7         |
| Hyoscine butylbromide                                       | 135,249   | 127,556 [116,412-138,700] | 6            |
| Glycopyrronium bromide                                      | 52,901    | 45,125 [37,416-52,833]    | 17.2         |
| Peppermint oil                                              | 42,818    | 43,086 [38,902-47,271]    | -0.6         |
| Alverine citrate                                            | 19,916    | 18,605 [16,448-20,762]    | 7            |
| Mebeverine hydrochloride compound preparations              | 4,817     | 5,243 [4,425-6,062]       | -8.1         |
| Propantheline bromide                                       | 4,610     | 5,357 [4,595-6,118]       | -13.9        |
| Dicycloverine hydrochloride                                 | 2,677     | 2,374 [1,415-3,333]       | 12.7         |
| Dicycloverine hydrochloride compound preparations           | 2,168     | 2,027 [1,481-2,574]       | 6.9          |

|                                                        |           |                                 |        |
|--------------------------------------------------------|-----------|---------------------------------|--------|
| Belladonna alkaloids                                   | 144       | 205 [74-337]                    | -29.9  |
| Compound antispasmodic preparations                    | 6         | -7 [-39-25]                     | -187.7 |
| Eluxadoline                                            | 1         | 0 [-26-26]                      | 482.2  |
| Alverine citratesimeticone                             | 1         | -19 [-114-75]                   | -105.1 |
| 103 Antisecretory Drugs and Mucosal Protectants        | 5,823,564 | 5,842,098[5,383,426-6,300,769]  | -0.3   |
| Omeprazole                                             | 2,812,955 | 2,680,279 [2,446,403-2,914,155] | 5      |
| Lansoprazole                                           | 2,415,856 | 2,264,356 [2,103,615-2,425,097] | 6.7    |
| Ranitidine hydrochloride                               | 238,778   | 550,592 [510,567-590,618]       | -56.6  |
| Esomeprazole                                           | 186,747   | 178,480 [164,903-192,056]       | 4.6    |
| Pantoprazole                                           | 120,002   | 108,848 [100,174-117,523]       | 10.2   |
| Rabeprazole sodium                                     | 30,503    | 28,113 [25,768-30,458]          | 8.5    |
| Cimetidine                                             | 12,504    | 6,640 [3,387-9,893]             | 88.3   |
| Famotidine                                             | 2,788     | 1,533 [910-2,155]               | 81.9   |
| Nizatidine                                             | 1,551     | 2,033 [562-3,505]               | -23.7  |
| Sucralfate                                             | 1,042     | 1,114 [-530-2,759]              | -6.5   |
| Other test for helicobacter pylori preparations        | 286       | 682 [358-1,005]                 | -58.1  |
| Misoprostol                                            | 427       | 261 [106-415]                   | 63.7   |
| Pirenzepine                                            | 149       | 97 [36-158]                     | 53.5   |
| Tripotassium dicitratobismuthate                       | 1         | -97 [-452-259]                  | -101   |
| 104 Acute diarrhoea                                    | 141,982   | 135,982[123,655-148,308]        | 4.4    |
| Loperamide hydrochloride                               | 141,530   | 136,385 [123,998-148,772]       | 3.8    |
| Loperamide hydrochloride and simeticone                | 275       | 285 [223-346]                   | -3.5   |
| Co-phenotrope (Diphenox hydrochlorideatropine sulfate) | 141       | -749 [-2,063-564]               | -118.8 |
| Opium and morphine                                     | 34        | 100 [-39-238]                   | -66    |
| Telotristat ethyl                                      | 2         | 0 [0-0]                         | Inf    |
| 105 Chronic bowel disorders                            | 218,058   | 205,820[190,785-220,854]        | 5.9    |
| Budesonide                                             | 335,824   | 289,159 [260,299-318,019]       | 16.1   |
| Mesalazine (Systemic)                                  | 129,948   | 122,079 [113,459-130,699]       | 6.4    |

|                                         |           |                                |        |
|-----------------------------------------|-----------|--------------------------------|--------|
| Sulfasalazine                           | 71,801    | 68,035 [62,779-73,291]         | 5.5    |
| Prednisolone sodium phosphate           | 6,290     | 6,215 [4,754-7,676]            | 1.2    |
| Balsalazide sodium                      | 3,954     | 3,671 [3,294-4,048]            | 7.7    |
| Prednisolone sodium metasulphobenzoate  | 1,839     | 1,506 [1,218-1,794]            | 22.1   |
| Olsalazine sodium                       | 1,008     | 942 [658-1,227]                | 7      |
| Beclometasone dipropionate (Systemic)   | 387       | 239 [159-319]                  | 62.1   |
| 106 Laxatives                           | 1,600,671 | 1,491,284[1,372,882-1,609,686] | 7.3    |
| Macrogol 3350                           | 555,260   | 509,716 [462,827-556,604]      | 8.9    |
| Senna                                   | 356,543   | 339,188 [288,035-390,341]      | 5.1    |
| Lactulose                               | 226,427   | 204,463 [181,630-227,296]      | 10.7   |
| Docusate sodium                         | 210,113   | 202,248 [189,321-215,174]      | 3.9    |
| Ispaghula husk                          | 91,812    | 84,758 [75,723-93,793]         | 8.3    |
| Bisacodyl                               | 87,495    | 87,439 [51,587-123,290]        | 0.1    |
| Glycerol                                | 19,624    | 16,694 [14,939-18,449]         | 17.6   |
| Sodium picosulfate                      | 14,889    | 14,438 [13,024-15,852]         | 3.1    |
| Prucalopride                            | 11,545    | 11,713 [10,824-12,603]         | -1.4   |
| Sodium citrate (Rectal)                 | 7,637     | 6,655 [5,928-7,381]            | 14.8   |
| Phosphates (Rectal)                     | 5,389     | 5,093 [4,675-5,512]            | 5.8    |
| Sterculia                               | 4,601     | 3,966 [3,441-4,491]            | 16     |
| Linaclotide                             | 4,166     | 4,163 [2,178-6,148]            | 0.1    |
| Naloxegol                               | 2,947     | 2,980 [2,718-3,242]            | -1.1   |
| Magnesium hydroxide                     | 1,456     | 2,008 [471-3,545]              | -27.5  |
| Methylcellulose                         | 1,227     | 1,009 [133-1,885]              | 21.6   |
| Bowel cleansing solutions               | 222       | 380 [211-549]                  | -41.5  |
| Co-danthramer (Dantronpoloxamer 188)    | 162       | 218 [-636-1,072]               | -25.6  |
| Arachis oil                             | 85        | 63 [24-102]                    | 35.6   |
| Co-danthrusate (Dantrondocusate sodium) | 34        | 171 [-618-960]                 | -80.1  |
| Macrogol 4000                           | 10        | -949 [-2,262-364]              | -101.1 |

|                                             |           |                                |        |
|---------------------------------------------|-----------|--------------------------------|--------|
| Castor oil                                  | 2         | 2 [-4-9]                       | -13.1  |
| Other osmotic laxative preparations         | 2         | 9 [6-13]                       | -78.9  |
| Other stimulant laxative preparations       | 3         | -25 [-59-8]                    | -111.9 |
| Lubiprostone                                | 3         | -123 [-500-254]                | -102.4 |
| Phosphates                                  | 1         | 5 [-18-28]                     | -80    |
| Methylnaltrexone bromide                    | 5         | -1 [-12-10]                    | -638.3 |
| 107 Local Prepn for Anal & Rectal Disorders | 90,176    | 97,216[84,655-109,777]         | -7.2   |
| Prednisolone                                | 574,235   | 612,617 [542,292-682,942]      | -6.3   |
| Hydrocortisone                              | 369,870   | 436,349 [382,747-489,950]      | -15.2  |
| Glyceryl trinitrate                         | 144,381   | 143,360 [128,729-157,991]      | 0.7    |
| Zinc oxide                                  | 27,992    | 24,593 [18,980-30,206]         | 13.8   |
| Fluocortolone                               | 261       | 504 [-330-1,338]               | -48.2  |
| Hamamelis                                   | 89        | 86 [56-117]                    | 3.3    |
| Other soothing haemorrhoidal preparations   | 91        | 77 [36-118]                    | 17.9   |
| Phenol                                      | 35        | 40 [3-77]                      | -12.6  |
| 108 Stoma care                              | 65        | 32[-206-270]                   | 103.5  |
|                                             | 65        | 32 [-206-270]                  | 103.5  |
| 109 Drugs affecting intestinal secretions   | 81,456    | 80,879[74,367-87,390]          | 0.7    |
| Pancreatin                                  | 52,710    | 53,918 [48,772-59,064]         | -2.2   |
| Ursodeoxycholic acid                        | 28,740    | 26,947 [25,149-28,744]         | 6.7    |
| Other preparations for biliary disorders    | 5         | 8 [-3-19]                      | -34.4  |
| Chenodeoxycholic acid                       | 1         | 1 [-3-5]                       | -23.1  |
| 201 Positive inotropic drugs                | 243,101   | 226,701[205,565-247,836]       | 7.2    |
|                                             | 243,101   | 226,701 [205,565-247,836]      | 7.2    |
| 202 Diuretics                               | 2,635,980 | 2,512,018[2,310,360-2,713,675] | 4.9    |
| Furosemide                                  | 991,720   | 948,450 [873,405-1,023,496]    | 4.6    |
| Bendroflumethiazide                         | 698,044   | 664,779 [573,935-755,624]      | 5      |
| Indapamide                                  | 417,902   | 416,893 [381,983-451,803]      | 0.2    |

|                                                           |         |                           |       |
|-----------------------------------------------------------|---------|---------------------------|-------|
| Spirolactone                                              | 244,198 | 233,339 [216,226-250,452] | 4.7   |
| Bumetanide                                                | 156,272 | 145,710 [134,926-156,493] | 7.2   |
| Eplerenone                                                | 76,673  | 73,376 [68,566-78,185]    | 4.5   |
| Co-amilofruse (Amiloride hydrochloridefrusemide)          | 25,503  | 22,377 [16,958-27,796]    | 14    |
| Amiloride hydrochloride                                   | 12,129  | 11,643 [8,789-14,497]     | 4.2   |
| Co-amilozide (Amiloride hydrochloridehydrochlorothiazide) | 7,541   | 6,637 [4,755-8,519]       | 13.6  |
| Torsemide                                                 | 1,424   | 1,183 [981-1,385]         | 20.4  |
| Metolazone                                                | 1,650   | 1,215 [875-1,555]         | 35.8  |
| Chlortalidone                                             | 1,138   | 1,149 [958-1,341]         | -1    |
| Amiloride hydrochloride with loop diuretics               | 450     | 434 [283-585]             | 3.7   |
| Xipamide                                                  | 271     | 275 [195-355]             | -1.3  |
| Spirolactone with loop diuretics                          | 285     | 294 [224-364]             | -3.1  |
| Triamterene with loop diuretics                           | 320     | 247 [155-340]             | 29.5  |
| Chlorothiazide                                            | 241     | 216 [150-282]             | 11.7  |
| Hydrochlorothiazide                                       | 123     | 103 [54-151]              | 19.7  |
| Co-flumactone (Hydroflumethiazidespirolactone)            | 46      | 14 [-29-57]               | 234.5 |
| Triamterene with thiazides                                | 41      | 65 [33-98]                | -37.3 |
| Triamterene                                               | 3       | 1 [-55-57]                | 141.9 |
| Co-triamterzide(Triamterenehydrochlorothiazide)           | 6       | 2 [-51-54]                | 280.6 |
| 203 Anti-arrhythmic drugs                                 | 80,392  | 76,464[69,974-82,953]     | 5.1   |
| Flecainide acetate                                        | 36,357  | 35,360 [32,602-38,117]    | 2.8   |
| Amiodarone hydrochloride                                  | 38,934  | 36,841 [33,076-40,606]    | 5.7   |
| Dronedarone hydrochloride                                 | 1,862   | 1,828 [1,492-2,164]       | 1.9   |
| Propafenone hydrochloride                                 | 1,520   | 1,468 [1,296-1,640]       | 3.6   |
| Disopyramide                                              | 992     | 1,003 [768-1,237]         | -1.1  |
| Disopyramide phosphate                                    | 564     | 573 [461-686]             | -1.6  |
| Mexiletine hydrochloride                                  | 162     | 148 [23-274]              | 9.3   |
| Quinidine sulfate                                         | 1       | 13 [-1-28]                | -92.4 |

|                                       |           |                                 |        |
|---------------------------------------|-----------|---------------------------------|--------|
| 204 Beta-adrenoceptor blocking drugs  | 3,374,348 | 3,309,208[3,085,225-3,533,191]  | 2      |
| Bisoprolol fumarate                   | 2,171,645 | 2,145,893 [1,992,357-2,299,430] | 1.2    |
| Atenolol                              | 511,410   | 490,525 [430,868-550,181]       | 4.3    |
| Propranolol hydrochloride             | 495,373   | 490,021 [456,665-523,377]       | 1.1    |
| Carvedilol                            | 50,947    | 49,230 [46,008-52,452]          | 3.5    |
| Nebivolol                             | 49,779    | 47,847 [44,476-51,218]          | 4      |
| Sotalol hydrochloride                 | 38,581    | 36,199 [31,736-40,662]          | 6.6    |
| Metoprolol tartrate                   | 29,196    | 19,143 [4,189-34,096]           | 52.5   |
| Co-tenidone (Atenololchlortalidone)   | 11,462    | 10,789 [8,421-13,157]           | 6.2    |
| Labetalol hydrochloride               | 8,926     | 6,081 [4,083-8,080]             | 46.8   |
| Celiprolol hydrochloride              | 2,687     | 2,581 [1,367-3,795]             | 4.1    |
| Nadolol                               | 1,234     | 1,186 [453-1,920]               | 4      |
| Atenolol with calcium channel blocker | 978       | 887 [529-1,245]                 | 10.3   |
| Acebutolol hydrochloride              | 726       | 699 [535-863]                   | 3.9    |
| Timolol with diuretic                 | 13        | 33 [-59-124]                    | -60.2  |
| Pindolol                              | 18        | -104 [-259-51]                  | -117.3 |
| 205 Hypertension and heart failure    | 6,132,951 | 6,010,994[5,603,519-6,418,470]  | 2      |
| Ramipril                              | 2,484,908 | 2,455,745 [2,290,919-2,620,571] | 1.2    |
| Losartan potassium                    | 880,102   | 878,049 [820,655-935,443]       | 0.2    |
| Lisinopril                            | 705,500   | 694,258 [640,821-747,695]       | 1.6    |
| Candesartan cilexetil                 | 604,485   | 597,466 [557,233-637,698]       | 1.2    |
| Doxazosin mesilate                    | 568,205   | 553,539 [515,243-591,834]       | 2.6    |
| Perindopril erbumine                  | 359,080   | 347,657 [320,180-375,134]       | 3.3    |
| Irbesartan                            | 148,613   | 143,817 [132,156-155,477]       | 3.3    |
| Enalapril maleate                     | 126,821   | 121,754 [109,488-134,019]       | 4.2    |
| Olmesartan medoxomil                  | 36,725    | 37,006 [32,246-41,766]          | -0.8   |
| Valsartan                             | 30,593    | 26,391 [13,875-38,906]          | 15.9   |
| Clonidine hydrochloride               | 28,652    | 34,719 [31,473-37,965]          | -17.5  |

|                                                   |        |                        |         |
|---------------------------------------------------|--------|------------------------|---------|
| Moxonidine                                        | 30,605 | 29,910 [27,210-32,609] | 2.3     |
| Telmisartan                                       | 27,039 | 25,813 [23,469-28,158] | 4.7     |
| Sacubitrilvalsartan                               | 27,072 | 25,852 [24,433-27,271] | 4.7     |
| Losartan potassium with diuretic                  | 14,409 | 12,690 [9,760-15,621]  | 13.5    |
| Hydralazine hydrochloride                         | 15,974 | 15,126 [14,082-16,170] | 5.6     |
| Lisinopril with diuretic                          | 8,242  | 6,014 [2,866-9,163]    | 37      |
| Irbesartan with diuretic                          | 6,470  | 5,593 [2,788-8,398]    | 15.7    |
| Methyldopa                                        | 5,778  | 5,808 [5,118-6,498]    | -0.5    |
| Trandolapril                                      | 5,550  | 4,768 [2,992-6,544]    | 16.4    |
| Captopril                                         | 5,443  | 5,045 [3,870-6,220]    | 7.9     |
| Valsartan with diuretic                           | 4,564  | 4,101 [3,105-5,097]    | 11.3    |
| Eprosartan                                        | 4,254  | 3,698 [2,495-4,902]    | 15      |
| Terazosin hydrochloride                           | 3,454  | 3,928 [2,778-5,078]    | -12.1   |
| Perindopril arginine with diuretic                | 3,260  | 3,043 [2,487-3,598]    | 7.1     |
| Telmisartan with diuretic                         | 2,737  | 2,542 [1,985-3,099]    | 7.7     |
| Prazosin hydrochloride                            | 2,226  | 2,770 [2,270-3,269]    | -19.6   |
| Perindopril arginine                              | 2,500  | 2,216 [1,627-2,805]    | 12.8    |
| Minoxidil                                         | 1,946  | 1,899 [1,690-2,107]    | 2.5     |
| Olmesartan medoxomilamlodipine                    | 1,477  | 1,493 [1,344-1,641]    | -1      |
| Aliskiren                                         | 1,461  | 1,418 [1,065-1,771]    | 3       |
| Olmesartan medoxomilhydrochlorothiazide           | 1,293  | 1,036 [788-1,284]      | 24.8    |
| Enalapril maleate with diuretic                   | 1,108  | 1,024 [774-1,274]      | 8.2     |
| Olmesartan medoxomilamlodipinehydrochlorothiazide | 870    | 932 [704-1,160]        | -6.7    |
| Imidapril hydrochloride                           | 570    | 524 [355-694]          | 8.7     |
| Ramipril with calcium channel blocker             | 524    | 512 [410-614]          | 2.3     |
| Quinapril hydrochloride                           | 585    | -12 [-5,524-5,500]     | -5010.7 |
| Fosinopril sodium                                 | 425    | 393 [-443-1,228]       | 8.2     |
| Perindopril with calcium channel blocker          | 213    | 323 [258-389]          | -34.1   |

|                                              |           |                                 |        |
|----------------------------------------------|-----------|---------------------------------|--------|
| Sildenafil(Vasodilator Antihypertensive)     | 245       | 213 [165-260]                   | 15.2   |
| Azilsartan medoxomil                         | 65        | 51 [35-67]                      | 27.8   |
| Phenoxybenzamine hydrochloride               | 77        | 89 [23-156]                     | -14    |
| Quinapril hydrochloride with diuretic        | 52        | 91 [27-154]                     | -42.6  |
| Bosentan                                     | 4         | 10 [-1-22]                      | -60.6  |
| Tadalafil (Vasodilator Antihypertensive)     | 1         | 0 [-4-4]                        | -394.6 |
| Macitentan                                   | 1         | 1 [-1-4]                        | -9.2   |
| Co-zidocapt (Hydrochlorothiazidecaptopril)   | 1         | -59 [-296-178]                  | -101.7 |
| Perindopril tosilate                         | 1         | -4 [-76-68]                     | -124.5 |
| Perindopril tosilateindapamide               | 3         | -1 [-37-35]                     | -351.5 |
| 206 Nit,Calc Block & Other Antianginal Drugs | 4,402,256 | 4,261,099[3,978,586-4,543,611]  | 3.3    |
| Amlodipine                                   | 2,654,153 | 2,601,243 [2,436,511-2,765,976] | 2      |
| Isosorbide mononitrate                       | 393,420   | 371,910 [343,296-400,524]       | 5.8    |
| Felodipine                                   | 312,333   | 304,391 [277,857-330,925]       | 2.6    |
| Lercanidipine hydrochloride                  | 236,661   | 232,614 [217,125-248,103]       | 1.7    |
| Diltiazem hydrochloride                      | 216,557   | 207,229 [189,700-224,759]       | 4.5    |
| Nifedipine                                   | 118,438   | 117,163 [101,272-133,054]       | 1.1    |
| Nicorandil                                   | 115,145   | 108,952 [97,356-120,547]        | 5.7    |
| Verapamil hydrochloride                      | 54,922    | 50,844 [45,792-55,896]          | 8      |
| Lacidipine                                   | 48,689    | 47,820 [44,365-51,276]          | 1.8    |
| Ranolazine                                   | 46,939    | 44,341 [41,419-47,264]          | 5.9    |
| Ivabradine                                   | 43,325    | 42,567 [39,511-45,623]          | 1.8    |
| Naftidrofuryl oxalate                        | 10,687    | 10,338 [8,409-12,268]           | 3.4    |
| Isosorbide dinitrate                         | 5,842     | 5,437 [4,540-6,335]             | 7.4    |
| Valsartanamlodipine                          | 2,037     | 1,960 [1,733-2,187]             | 3.9    |
| Cilostazol                                   | 1,679     | 1,647 [1,343-1,950]             | 2      |
| Pentoxifylline                               | 1,613     | 1,593 [1,180-2,006]             | 1.3    |
| Nicardipine hydrochloride                    | 1,242     | 991 [558-1,425]                 | 25.3   |



|                                  |           |                                 |        |
|----------------------------------|-----------|---------------------------------|--------|
| Rutosides                        | 814       | 722 [398-1,047]                 | 12.7   |
| Moxisylyte hydrochloride         | 88        | 117 [69-165]                    | -24.7  |
| Trimetazidine hydrochloride      | 67        | 47 [20-74]                      | 41.8   |
| Nimodipine                       | 65        | 43 [14-72]                      | 50.8   |
| Isradipine                       | 3         | -96 [-255-63]                   | -103.1 |
| Nicotinic acid derivatives       | 3         | -124 [-541-292]                 | -102.4 |
| 207 Sympathomimetics             | 11,632    | 11,314[10,319-12,308]           | 2.8    |
| Midodrine hydrochloride          | 11,620    | 11,281 [10,301-12,261]          | 3      |
| Etilefrine hydrochloride         | 1         | 0 [-3-4]                        | 561    |
| 208 Anticoagulants and protamine | 1,663,949 | 1,603,926[1,476,245-1,731,607]  | 3.7    |
| Warfarin sodium                  | 513,997   | 515,254 [426,896-603,611]       | -0.2   |
| Apixaban                         | 580,192   | 566,428 [535,423-597,433]       | 2.4    |
| Rivaroxaban                      | 385,758   | 393,318 [346,118-440,517]       | -1.9   |
| Edoxaban                         | 118,269   | 111,934 [101,893-121,974]       | 5.7    |
| Dabigatran etexilate             | 38,039    | 38,347 [32,428-44,267]          | -0.8   |
| Enoxaparin                       | 10,472    | 11,579 [9,994-13,164]           | -9.6   |
| Dalteparin sodium                | 7,244     | 7,375 [5,236-9,515]             | -1.8   |
| Tinzaparin sodium                | 4,800     | 5,402 [4,228-6,576]             | -11.1  |
| INR blood testing reagents       | 2,522     | 2,253 [1,670-2,836]             | 11.9   |
| Acenocoumarol                    | 1,680     | 1,622 [1,338-1,906]             | 3.6    |
| Heparin flushes                  | 690       | 490 [317-663]                   | 40.8   |
| Fondaparinux sodium              | 103       | 129 [91-168]                    | -20.3  |
| Pentosan polysulfate sodium      | 104       | 63 [30-96]                      | 65.5   |
| Phenindione                      | 55        | 54 [6-102]                      | 1.7    |
| Heparin sodium                   | 19        | 16 [-2-33]                      | 20.4   |
| Heparin calcium                  | 5         | 4 [-6-14]                       | 25.3   |
| 209 Antiplatelet drugs           | 2,814,039 | 2,632,416[2,415,650-2,849,182]  | 6.9    |
| Aspirin                          | 1,852,085 | 1,713,594 [1,533,471-1,893,718] | 8.1    |

|                                             |           |                                 |         |
|---------------------------------------------|-----------|---------------------------------|---------|
| Clopidogrel                                 | 890,559   | 865,516 [800,477-930,556]       | 2.9     |
| Ticagrelor                                  | 50,033    | 51,407 [45,739-57,076]          | -2.7    |
| Dipyridamole                                | 20,137    | 15,309 [3,692-26,927]           | 31.5    |
| Prasugrel                                   | 5,816     | 4,768 [4,035-5,500]             | 22      |
| Dipyridamole and aspirin                    | 55        | -769 [-6,622-5,085]             | -107.2  |
| Ticlopidine hydrochloride                   | 1         | 0 [-3-3]                        | -2605.7 |
| 211 Antifibrinolytic drugs and haemostatics | 32,451    | 35,647[31,994-39,301]           | -9      |
| Tranexamic acid                             | 32,449    | 35,627 [31,931-39,324]          | -8.9    |
| Etamsylate                                  | 2         | -4 [-109-101]                   | -147.2  |
| 212 Lipid-regulating drugs                  | 6,555,062 | 6,320,601[5,903,415-6,737,787]  | 3.7     |
| Atorvastatin                                | 4,122,963 | 4,105,298 [3,813,787-4,396,809] | 0.4     |
| Simvastatin                                 | 1,699,132 | 1,586,597 [1,350,244-1,822,950] | 7.1     |
| Rosuvastatin calcium                        | 235,177   | 232,597 [217,908-247,286]       | 1.1     |
| Pravastatin sodium                          | 209,102   | 202,463 [184,270-220,656]       | 3.3     |
| Ezetimibe                                   | 163,314   | 158,552 [146,743-170,361]       | 3       |
| Fenofibrate                                 | 47,705    | 44,514 [41,008-48,019]          | 7.2     |
| Bezafibrate                                 | 32,973    | 31,362 [28,042-34,682]          | 5.1     |
| Colesevelam hydrochloride                   | 12,509    | 12,352 [10,101-14,603]          | 1.3     |
| Colestyramine                               | 10,287    | 12,104 [10,107-14,101]          | -15     |
| Fluvastatin sodium                          | 9,126     | 9,078 [7,830-10,327]            | 0.5     |
| Omega-3-acid ethyl esters                   | 7,647     | 5,877 [792-10,963]              | 30.1    |
| Ciprofibrate                                | 1,840     | 1,766 [1,270-2,263]             | 4.2     |
| Simvastatin and ezetimibe                   | 1,339     | 1,215 [697-1,733]               | 10.2    |
| Colestipol hydrochloride                    | 1,074     | 698 [53-1,343]                  | 53.9    |
| Gemfibrozil                                 | 722       | 670 [544-796]                   | 7.7     |
| Acipimox                                    | 137       | 131 [78-184]                    | 4.4     |
| Alirocumab                                  | 7         | 4 [-3-11]                       | 74.7    |
| Evolocumab                                  | 3         | 5 [1-9]                         | -37.7   |

|                                        |           |                                 |        |
|----------------------------------------|-----------|---------------------------------|--------|
| Fenofibratesimvastatin                 | 3         | 3 [-26-32]                      | 7.1    |
| Omega-3 marine triglycerides           | 1         | 59 [-172-290]                   | -98.3  |
| 301 Bronchodilators                    | 2,811,397 | 2,503,458[2,302,053-2,704,862]  | 12.3   |
| Salbutamol                             | 2,011,435 | 1,749,553 [1,597,448-1,901,657] | 15     |
| Tiotropium bromide                     | 293,714   | 275,477 [239,331-311,624]       | 6.6    |
| Beclometdipropformoterolglycopyrronium | 95,229    | 99,533 [91,150-107,916]         | -4.3   |
| Umeclidinium bromidevilanterol         | 68,127    | 67,951 [64,569-71,333]          | 0.3    |
| Terbutaline sulphate                   | 45,840    | 35,056 [30,134-39,978]          | 30.8   |
| Umeclidinium bromide                   | 48,553    | 48,522 [35,681-61,362]          | 0.1    |
| Glycopyrronium bromide                 | 52,901    | 45,125 [37,416-52,833]          | 17.2   |
| Ipratropium bromide                    | 39,486    | 35,594 [29,129-42,059]          | 10.9   |
| Theophylline                           | 38,396    | 37,283 [34,129-40,437]          | 3      |
| Salmeterol                             | 25,414    | 21,546 [15,200-27,891]          | 18     |
| Tiotropium bromideolodaterol           | 25,123    | 24,593 [23,244-25,941]          | 2.2    |
| Indacaterolglycopyrronium              | 23,922    | 26,272 [22,966-29,578]          | -8.9   |
| Acidinium bromide                      | 22,105    | 20,659 [14,042-27,276]          | 7      |
| Aminophylline hydrate                  | 22,416    | 20,733 [18,607-22,860]          | 8.1    |
| Acidinium bromideformoterol            | 15,981    | 16,027 [12,965-19,088]          | -0.3   |
| Formoterol fumarate                    | 9,862     | 9,451 [8,162-10,740]            | 4.3    |
| Indacaterol maleate                    | 1,454     | 1,357 [953-1,760]               | 7.2    |
| Ephedrine hydrochloride                | 488       | 440 [227-653]                   | 10.9   |
| Bambuterol hydrochloride               | 288       | 268 [173-364]                   | 7.3    |
| Olodaterol                             | 252       | 253 [170-336]                   | -0.3   |
| Aminophylline                          | 15        | 1 [-20-22]                      | 1006.3 |
| 302 Corticosteroids (respiratory)      | 2,000,084 | 1,726,319[1,596,670-1,855,967]  | 15.9   |
| Beclometasone dipropionate             | 1,280,550 | 1,122,659 [1,032,041-1,213,276] | 14.1   |
| Fluticasone propionate (Inhalation)    | 391,680   | 326,526 [275,740-377,312]       | 20     |
| Budesonide                             | 335,824   | 289,159 [260,299-318,019]       | 16.1   |

|                                                |           |                               |        |
|------------------------------------------------|-----------|-------------------------------|--------|
| Fluticasone furoate (Inhalation)               | 169,866   | 168,345 [157,036-179,655]     | 0.9    |
| Ciclesonide                                    | 4,529     | 3,733 [3,199-4,268]           | 21.3   |
| 303 Cromoglycate, Rel, Leukotriene Antagonists | 301,088   | 276,065 [258,517-293,614]     | 9.1    |
| Montelukast                                    | 299,688   | 278,360 [260,518-296,202]     | 7.7    |
| Roflumilast                                    | 577       | 646 [552-739]                 | -10.6  |
| Zafirlukast                                    | 24        | -568 [-2,849-1,714]           | -104.2 |
| 304 Antihist, Hyposensit & Allergic Emergen    | 1,224,245 | 1,148,521 [981,425-1,315,617] | 6.6    |
| Cetirizine hydrochloride                       | 384,349   | 344,603 [267,037-422,169]     | 11.5   |
| Fexofenadine hydrochloride                     | 369,368   | 326,289 [285,844-366,734]     | 13.2   |
| Loratadine                                     | 160,408   | 144,360 [109,606-179,115]     | 11.1   |
| Promethazine hydrochloride                     | 129,307   | 119,195 [109,481-128,909]     | 8.5    |
| Chlorphenamine maleate                         | 76,801    | 77,138 [59,729-94,547]        | -0.4   |
| Adrenaline                                     | 31,456    | 32,889 [24,439-41,340]        | -4.4   |
| Hydroxyzine hydrochloride                      | 33,669    | 31,864 [25,042-38,687]        | 5.7    |
| Desloratadine                                  | 19,597    | 17,458 [13,836-21,081]        | 12.2   |
| Levocetirizine                                 | 5,700     | 4,797 [1,867-7,726]           | 18.8   |
| Acrivastine                                    | 4,828     | 4,037 [2,962-5,112]           | 19.6   |
| Alimemazine tartrate                           | 2,529     | 2,001 [837-3,165]             | 26.4   |
| Diphenhydramine hydrochloride                  | 2,481     | 2,387 [1,725-3,050]           | 3.9    |
| Mizolastine                                    | 2,367     | 2,025 [1,619-2,431]           | 16.9   |
| Ketotifen fumarate                             | 1,715     | 1,810 [1,337-2,283]           | -5.3   |
| Clemastine fumarate                            | 417       | 358 [286-430]                 | 16.5   |
| Cyproheptadine hydrochloride                   | 247       | 235 [146-324]                 | 5.3    |
| Timothy grass pollen allergen extract          | 164       | 172 [128-216]                 | -4.6   |
| Rupatadine fumarate                            | 164       | 175 [-224-574]                | -6.1   |
| Bilastine                                      | 110       | 118 [51-185]                  | -7.1   |
| C1-Esterase inhibitor                          | 3         | 6 [-7-20]                     | -53.8  |
| Brompheniramine maleate                        | 1         | 1 [-3-5]                      | -15.3  |

|                                                   |           |                                |        |
|---------------------------------------------------|-----------|--------------------------------|--------|
| Omalizumab                                        | 2         | -1 [-9-6]                      | -256.1 |
| 307 Mucolytics                                    | 257,964   | 240,586[224,077-257,096]       | 7.2    |
| Carbocysteine                                     | 251,741   | 237,674 [221,222-254,126]      | 5.9    |
| Acetylcysteine                                    | 7,356     | 6,737 [5,483-7,991]            | 9.2    |
| Dornase alfa                                      | 781       | 632 [463-801]                  | 23.6   |
| Erdosteine                                        | 707       | 742 [522-961]                  | -4.7   |
| Mannitol                                          | 1         | 1 [-3-5]                       | 49.6   |
| 308 Aromatic inhalations                          | 72        | 234[-20-489]                   | -69.3  |
| Menthol                                           | 9,851     | 9,963 [9,049-10,876]           | -1.1   |
| Benzoin                                           | 6         | 5 [-8-18]                      | 18.3   |
| Other aromatic inhalation preparations            | 1         | -3 [-13-6]                     | -131.2 |
| 309 Cough preparations                            | 15,454    | 17,628[-7,863-43,119]          | -12.3  |
| Codeine phosphate                                 | 423,557   | 424,477 [389,266-459,687]      | -0.2   |
| Simple                                            | 4,419     | 4,942 [-8,144-18,029]          | -10.6  |
| Pholcodine                                        | 3,123     | 3,998 [-4,077-12,072]          | -21.9  |
| Guaifenesin                                       | 102       | 142 [22-262]                   | -28    |
| Dextromethorphan hydrobromide                     | 72        | 66 [-3-134]                    | 9.5    |
| Other expectorantand demulcent cough preparations | 8         | 5 [-11-21]                     | 71.3   |
| Squill                                            | 11        | 14 [-37-65]                    | -19.7  |
| Dextromethorphan hydrobrom compound preparations  | 5         | 5 [-14-24]                     | -2.4   |
| 310 Systemic nasal decongestants                  | 2,149     | 2,465[-937-5,866]              | -12.8  |
| Pseudoephedrine hydrochloride                     | 2,083     | 2,405 [-989-5,798]             | -13.4  |
| 401 Hypnotics and anxiolytics                     | 1,192,010 | 1,145,737[1,052,874-1,238,600] | 4      |
| Zopiclone                                         | 421,406   | 405,786 [370,878-440,694]      | 3.8    |
| Diazepam                                          | 389,898   | 393,142 [359,897-426,387]      | -0.8   |
| Melatonin                                         | 99,528    | 93,569 [87,268-99,869]         | 6.4    |
| Lorazepam                                         | 96,533    | 87,585 [80,482-94,688]         | 10.2   |
| Temazepam                                         | 69,267    | 67,422 [50,252-84,592]         | 2.7    |

|                                                  |           |                              |       |
|--------------------------------------------------|-----------|------------------------------|-------|
| Zolpidem tartrate                                | 51,804    | 50,763 [46,224-55,302]       | 2.1   |
| Nitrazepam                                       | 33,418    | 31,080 [25,771-36,388]       | 7.5   |
| Buspirone hydrochloride                          | 16,124    | 15,016 [13,940-16,092]       | 7.4   |
| Oxazepam                                         | 5,791     | 5,489 [4,758-6,221]          | 5.5   |
| Chlordiazepoxide hydrochloride                   | 3,326     | 2,532 [236-4,829]            | 31.4  |
| Lormetazepam                                     | 1,305     | 1,578 [1,253-1,904]          | -17.3 |
| Loprazolam mesilate                              | 1,317     | 388 [-606-1,381]             | 239.7 |
| Chloral hydrate                                  | 1,131     | 952 [840-1,064]              | 18.8  |
| Clomethiazole                                    | 753       | 427 [9-845]                  | 76.2  |
| Sodium oxybate                                   | 102       | 97 [69-125]                  | 5.3   |
| Amobarbital sodium                               | 82        | 71 [25-118]                  | 15.3  |
| Secobarbital sodium                              | 86        | 75 [19-131]                  | 14.9  |
| Cloral betaine                                   | 45        | 62 [-335-459]                | -27.7 |
| Meprobamate                                      | 38        | 26 [-17-68]                  | 48    |
| Clomethiazole edisilate                          | 30        | 142 [72-212]                 | -78.9 |
| Butobarbital                                     | 25        | 26 [-5-57]                   | -3.3  |
| Alprazolam                                       | 1         | 0 [-2-3]                     | 206.1 |
| 402 Drugs used in psychoses and related disorder | 1,091,501 | 1,018,306[948,933-1,087,679] | 7.2   |
| Quetiapine                                       | 331,058   | 313,231 [292,327-334,134]    | 5.7   |
| Olanzapine                                       | 212,733   | 203,478 [188,453-218,503]    | 4.5   |
| Risperidone                                      | 151,339   | 140,489 [129,766-151,213]    | 7.7   |
| Aripiprazole                                     | 111,071   | 105,536 [98,927-112,145]     | 5.2   |
| Lithium carbonate                                | 75,435    | 70,213 [65,312-75,114]       | 7.4   |
| Valproic acid                                    | 50,938    | 48,166 [43,375-52,957]       | 5.8   |
| Amisulpride                                      | 35,103    | 32,298 [29,882-34,713]       | 8.7   |
| Haloperidol                                      | 33,612    | 24,630 [19,717-29,542]       | 36.5  |
| Chlorpromazine hydrochloride                     | 21,104    | 19,514 [17,259-21,769]       | 8.1   |
| Promazine hydrochloride                          | 10,358    | 9,848 [8,481-11,215]         | 5.2   |

|                               |           |                                 |       |
|-------------------------------|-----------|---------------------------------|-------|
| Levomepromazine hydrochloride | 16,563    | 8,506 [6,298-10,714]            | 94.7  |
| Sulpiride                     | 9,958     | 9,987 [8,919-11,056]            | -0.3  |
| Zuclopenthixol hydrochloride  | 7,413     | 6,973 [6,395-7,551]             | 6.3   |
| Pericyazine                   | 5,035     | 4,720 [3,743-5,698]             | 6.7   |
| Flupentixol decanoate         | 3,940     | 3,651 [3,304-3,998]             | 7.9   |
| Trifluoperazine               | 2,979     | 2,490 [1,590-3,390]             | 19.6  |
| Levomepromazine maleate       | 3,156     | 2,839 [2,113-3,566]             | 11.1  |
| Zuclopenthixol decanoate      | 2,542     | 2,453 [2,177-2,730]             | 3.6   |
| Lurasidone                    | 1,830     | 1,662 [1,453-1,870]             | 10.1  |
| Paliperidone                  | 1,221     | 1,206 [1,015-1,398]             | 1.2   |
| Haloperidol decanoate         | 758       | 726 [534-917]                   | 4.4   |
| Lithium citrate               | 633       | 600 [506-694]                   | 5.5   |
| Benperidol                    | 398       | 347 [289-405]                   | 14.6  |
| Pimozide                      | 313       | 292 [180-404]                   | 7.2   |
| Clozapine                     | 220       | 187 [114-260]                   | 17.8  |
| Fluphenazine decanoate        | 150       | 101 [-169-370]                  | 49.2  |
| Asenapine                     | 83        | 78 [29-127]                     | 6.2   |
| Cariprazine                   | 67        | 36 [21-50]                      | 86.1  |
| Perphenazine                  | 41        | 22 [-5-50]                      | 83.3  |
| Thioridazine                  | 12        | 14 [-30-59]                     | -17   |
| Olanzapine embonate           | 18        | 12 [3-22]                       | 47.2  |
| Fluphenazine hydrochloride    | 3         | 6 [-3-15]                       | -49.9 |
| Zuclopenthixol acetate        | 3         | 8 [-12-27]                      | -60.3 |
| 403 Antidepressant drugs      | 6,457,891 | 6,344,381[5,912,525-6,776,238]  | 1.8   |
| Sertraline hydrochloride      | 1,491,254 | 1,496,155 [1,396,984-1,595,325] | -0.3  |
| Citalopram hydrobromide       | 1,160,956 | 1,169,152 [1,069,551-1,268,752] | -0.7  |
| Amitriptyline hydrochloride   | 1,195,024 | 1,183,519 [1,098,115-1,268,922] | 1     |
| Mirtazapine                   | 866,047   | 840,938 [785,376-896,500]       | 3     |

|                                            |         |                           |       |
|--------------------------------------------|---------|---------------------------|-------|
| Fluoxetine hydrochloride                   | 577,949 | 572,024 [525,760-618,288] | 1     |
| Venlafaxine                                | 416,803 | 398,597 [372,359-424,835] | 4.6   |
| Duloxetine hydrochloride                   | 265,507 | 258,541 [242,213-274,869] | 2.7   |
| Escitalopram                               | 110,580 | 111,012 [104,040-117,984] | -0.4  |
| Paroxetine hydrochloride                   | 109,853 | 106,594 [98,292-114,895]  | 3.1   |
| Trazodone hydrochloride                    | 99,828  | 96,998 [89,771-104,225]   | 2.9   |
| Nortriptyline                              | 57,061  | 57,323 [52,542-62,103]    | -0.5  |
| Dosulepin hydrochloride                    | 42,975  | 39,294 [29,598-48,991]    | 9.4   |
| Clomipramine hydrochloride                 | 19,399  | 17,665 [13,953-21,378]    | 9.8   |
| Vortioxetine                               | 14,931  | 13,633 [12,545-14,721]    | 9.5   |
| Lofepamine hydrochloride                   | 14,028  | 12,584 [10,799-14,370]    | 11.5  |
| Flupentixol hydrochloride                  | 14,369  | 13,312 [12,097-14,528]    | 7.9   |
| Imipramine hydrochloride                   | 11,774  | 11,771 [10,149-13,394]    | 0     |
| Citalopram hydrochloride                   | 5,828   | 5,585 [4,963-6,207]       | 4.4   |
| Trimipramine maleate                       | 2,088   | 1,781 [1,118-2,444]       | 17.2  |
| Reboxetine                                 | 1,949   | 1,865 [1,570-2,160]       | 4.5   |
| Doxepin                                    | 1,884   | 1,727 [1,395-2,058]       | 9.1   |
| Fluvoxamine maleate                        | 1,933   | 1,818 [1,429-2,207]       | 6.3   |
| Agomelatine                                | 1,869   | 1,622 [1,397-1,846]       | 15.3  |
| Moclobemide                                | 684     | 1,128 [845-1,412]         | -39.4 |
| Phenelzine sulfate                         | 546     | 569 [289-850]             | -4.1  |
| Tranlycypromine sulfate                    | 511     | 518 [409-627]             | -1.3  |
| Isocarboxazid                              | 147     | 149 [107-191]             | -1.3  |
| Tryptophan                                 | 113     | 89 [39-139]               | 27.2  |
| Mianserin hydrochloride                    | 45      | 161 [54-269]              | -72.1 |
| Nefazodone hydrochloride                   | 6       | 5 [-7-16]                 | 32.5  |
| Oxitriptan                                 | 12      | 10 [1-18]                 | 24    |
| 404 CNS stimulants and drugs used for ADHD | 132,085 | 129,885[120,849-138,920]  | 1.7   |



|                                              |         |                           |       |
|----------------------------------------------|---------|---------------------------|-------|
| Methylphenidate hydrochloride                | 91,324  | 92,872 [86,075-99,668]    | -1.7  |
| Lisdexamfetamine dimesylate                  | 16,233  | 16,231 [14,969-17,494]    | 0     |
| Atomoxetine hydrochloride                    | 10,674  | 10,119 [9,250-10,987]     | 5.5   |
| Modafinil                                    | 6,986   | 6,786 [6,288-7,283]       | 3     |
| Dexamfetamine sulfate                        | 4,042   | 4,060 [3,738-4,382]       | -0.4  |
| Guanfacine                                   | 2,799   | 2,559 [2,357-2,761]       | 9.4   |
| Pitolisant hydrochloride                     | 23      | 21 [12-29]                | 10.3  |
| Caffeine                                     | 1       | 5 [0-11]                  | -81.8 |
| Caffeine citrate                             | 3       | 1 [-7-9]                  | 154.5 |
| 405 Obesity                                  | 22,926  | 26,756[22,930-30,582]     | -14.3 |
| Orlistat                                     | 22,922  | 26,753 [22,926-30,580]    | -14.3 |
| Naltrexonebupropion                          | 4       | 3 [-1-7]                  | 31.6  |
| 406 Drugs used in nausea and vertigo         | 501,384 | 490,706[424,718-556,694]  | 2.2   |
| Betahistine hydrochloride                    | 134,555 | 133,659 [122,744-144,575] | 0.7   |
| Prochlorperazine maleate                     | 114,563 | 122,720 [109,685-135,755] | -6.6  |
| Cyclizine hydrochloride                      | 81,786  | 77,820 [69,203-86,436]    | 5.1   |
| Metoclopramide hydrochloride                 | 60,334  | 53,444 [44,357-62,532]    | 12.9  |
| Domperidone                                  | 27,813  | 33,317 [-12,964-79,597]   | -16.5 |
| Cinnarizine                                  | 26,698  | 26,978 [23,930-30,025]    | -1    |
| Ondansetron hydrochloride                    | 21,949  | 22,246 [20,457-24,035]    | -1.3  |
| Hyoscine                                     | 11,386  | 10,885 [9,247-12,522]     | 4.6   |
| Hyoscine hydrobromide                        | 10,904  | 8,897 [4,828-12,966]      | 22.6  |
| Cyclizine lactate                            | 10,414  | 5,927 [4,154-7,701]       | 75.7  |
| Promethazine teoclate                        | 2,431   | 2,215 [542-3,889]         | 9.7   |
| Prochlorperazine mesilate                    | 588     | 344 [-140-827]            | 71.1  |
| Dimenhydrinatecinnarizine                    | 446     | 455 [373-537]             | -2    |
| Doxylamine succinatepyridoxine hydrochloride | 312     | 328 [216-439]             | -4.8  |
| Flunarizine dihydrochloride                  | 164     | 110 [75-145]              | 49.2  |

|                                           |           |                                 |       |
|-------------------------------------------|-----------|---------------------------------|-------|
| Ketamine hydrochloride                    | 128       | 106 [56-156]                    | 20.4  |
| Granisetron hydrochloride                 | 47        | 54 [14-94]                      | -13.5 |
| Nabilone                                  | 46        | 13 [-65-91]                     | 253.8 |
| Granisetron                               | 44        | 34 [5-62]                       | 30.4  |
| Aprepitant                                | 11        | 6 [-10-21]                      | 89.7  |
| 407 Analgesics                            | 5,309,715 | 4,991,310[4,551,713-5,430,908]  | 6.4   |
| Paracetamol                               | 1,614,223 | 1,359,988 [1,186,801-1,533,175] | 18.7  |
| Co-codamol (Codeine phosphateparacetamol) | 1,260,022 | 1,226,456 [1,127,237-1,325,676] | 2.7   |
| Tramadol hydrochloride                    | 493,437   | 482,590 [430,372-534,807]       | 2.2   |
| Morphine sulfate                          | 458,547   | 426,753 [391,634-461,873]       | 7.5   |
| Buprenorphine                             | 202,966   | 203,609 [186,195-221,024]       | -0.3  |
| Methadone hydrochloride                   | 181,021   | 157,007 [142,247-171,766]       | 15.3  |
| Sumatriptan succinate                     | 148,193   | 152,343 [139,487-165,199]       | -2.7  |
| Oxycodone hydrochloride                   | 155,119   | 152,093 [140,335-163,851]       | 2     |
| Co-dydramol (Dihydrocodeineparacetamol)   | 137,423   | 131,018 [113,872-148,163]       | 4.9   |
| Dihydrocodeine tartrate                   | 126,056   | 126,389 [116,082-136,696]       | -0.3  |
| Fentanyl                                  | 83,872    | 81,705 [73,541-89,869]          | 2.7   |
| Pizotifen malate                          | 43,496    | 43,025 [39,569-46,481]          | 1.1   |
| Zolmitriptan                              | 29,514    | 29,728 [27,013-32,443]          | -0.7  |
| Clonidine hydrochloride                   | 28,652    | 34,719 [31,473-37,965]          | -17.5 |
| Rizatriptan                               | 26,530    | 26,536 [24,430-28,643]          | 0     |
| Nefopam hydrochloride                     | 22,884    | 21,676 [7,728-35,623]           | 5.6   |
| Tapentadol hydrochloride                  | 13,935    | 14,129 [12,860-15,398]          | -1.4  |
| Naratriptan hydrochloride                 | 11,704    | 11,622 [10,391-12,852]          | 0.7   |
| Analgesics with anti-emetics              | 11,082    | 9,675 [3,752-15,598]            | 14.5  |
| Meptazinol hydrochloride                  | 5,859     | 5,755 [5,222-6,289]             | 1.8   |
| Frovatriptan                              | 4,597     | 4,590 [4,167-5,012]             | 0.2   |
| Diamorphine hydrochloride (Systemic)      | 5,102     | 5,249 [2,921-7,576]             | -2.8  |

|                                                           |           |                                |         |
|-----------------------------------------------------------|-----------|--------------------------------|---------|
| Oxycodone hydrochloridenaloxone hydrochloride             | 3,269     | 2,902 [2,333-3,472]            | 12.6    |
| Almotriptan                                               | 2,806     | 3,343 [2,953-3,733]            | -16.1   |
| Eletriptan                                                | 1,156     | 1,236 [1,065-1,408]            | -6.5    |
| Pethidine hydrochloride                                   | 1,124     | 1,295 [1,023-1,568]            | -13.2   |
| Co-proxamol (Dextropropoxyphene hydrochlorideparacetamol) | 966       | -100 [-2,890-2,690]            | -1065.2 |
| Hydromorphone hydrochloride                               | 659       | 688 [554-821]                  | -4.2    |
| Tolfenamic acid                                           | 461       | 442 [318-566]                  | 4.4     |
| Paracetamol combined preparations                         | 409       | 413 [317-508]                  | -0.9    |
| Dipipanone hydrochloride                                  | 144       | 111 [-363-586]                 | 29.2    |
| Pentazocine hydrochloride                                 | 118       | 112 [68-156]                   | 5.4     |
| Ergotamine tartrate                                       | 112       | 117 [-169-404]                 | -4.5    |
| Isometheptene mucate                                      | 48        | 172 [126-218]                  | -72.1   |
| Morphine tartrate and cyclizine tartrate                  | 37        | 26 [-63-114]                   | 43.3    |
| Other non-opioid analgesic preparations                   | 16        | 21 [-3-44]                     | -22.6   |
| Aspirin combined preparations                             | 9         | 16 [-12-43]                    | -41.9   |
| Paracetamol and caffeine                                  | 29        | 18 [-5-40]                     | 63.7    |
| Paracetamol and ibuprofen                                 | 11        | 20 [4-36]                      | -44.3   |
| Co-codaprin (Codeine phosphateaspirin)                    | 9         | 14 [-22-50]                    | -35.4   |
| Aspirin and caffeine                                      | 4         | 2 [-6-11]                      | 70.4    |
| Erenumab                                                  | 1         | 3 [2-4]                        | -64.5   |
| Gabapentin (Neuropathic Pain)                             | 1         | 2 [-2-6]                       | -47.8   |
| 408 Antiepileptic drugs                                   | 2,499,462 | 2,404,322[2,221,327-2,587,318] | 4       |
| Pregabalin                                                | 646,840   | 627,189 [575,568-678,811]      | 3.1     |
| Gabapentin                                                | 616,414   | 580,841 [521,414-640,268]      | 6.1     |
| Lamotrigine                                               | 263,163   | 253,071 [237,315-268,827]      | 4       |
| Levetiracetam                                             | 217,781   | 209,775 [195,964-223,587]      | 3.8     |
| Sodium valproate                                          | 210,601   | 206,556 [189,800-223,312]      | 2       |
| Carbamazepine                                             | 193,018   | 184,628 [171,064-198,192]      | 4.5     |

|                                                      |         |                           |       |
|------------------------------------------------------|---------|---------------------------|-------|
| Topiramate                                           | 85,693  | 83,210 [77,353-89,067]    | 3     |
| Clonazepam                                           | 86,439  | 82,667 [76,456-88,878]    | 4.6   |
| Phenytoin sodium                                     | 55,206  | 51,945 [46,774-57,116]    | 6.3   |
| Midazolam hydrochloride                              | 45,033  | 25,303 [21,198-29,408]    | 78    |
| Clobazam                                             | 28,530  | 27,428 [25,486-29,370]    | 4     |
| Phenobarbital                                        | 15,524  | 14,752 [13,349-16,155]    | 5.2   |
| Lacosamide                                           | 15,648  | 14,741 [13,781-15,701]    | 6.2   |
| Zonisamide                                           | 14,974  | 14,238 [13,277-15,200]    | 5.2   |
| Primidone                                            | 13,129  | 13,000 [12,044-13,957]    | 1     |
| Oxcarbazepine                                        | 9,401   | 9,329 [8,625-10,034]      | 0.8   |
| Perampanel                                           | 4,554   | 4,658 [4,252-5,064]       | -2.2  |
| Ethosuximide                                         | 3,387   | 3,163 [2,917-3,408]       | 7.1   |
| Brivaracetam                                         | 3,312   | 3,140 [2,712-3,569]       | 5.5   |
| Eslicarbazepine acetate                              | 2,139   | 2,105 [1,936-2,274]       | 1.6   |
| Phenytoin                                            | 1,595   | 1,359 [1,043-1,676]       | 17.3  |
| Midazolam maleate                                    | 1,438   | 1,780 [1,049-2,510]       | -19.2 |
| Vigabatrin                                           | 1,130   | 1,070 [947-1,192]         | 5.6   |
| Rufinamide                                           | 1,069   | 1,037 [884-1,190]         | 3.1   |
| Stiripentol                                          | 250     | 236 [189-283]             | 5.9   |
| Paraldehyde                                          | 119     | 112 [70-153]              | 6.6   |
| Tiagabine                                            | 121     | 102 [46-158]              | 18.6  |
| Phenobarbital sodium                                 | 28      | 24 [-7-54]                | 19.1  |
| Sultiame                                             | 30      | 35 [-36-106]              | -14.7 |
| Felbamate                                            | 7       | 3 [-11-16]                | 164.2 |
| 409 Drugs used in Parkinsonism and related disorders | 456,379 | 435,504[405,542-465,466]  | 4.8   |
| Co-careldopa (Carbidopalevodopa)                     | 112,977 | 109,039 [101,512-116,566] | 3.6   |
| Co-beneldopa (Benserazidelevodopa)                   | 89,155  | 84,226 [78,425-90,027]    | 5.9   |
| Procyclidine hydrochloride                           | 77,713  | 73,456 [68,233-78,680]    | 5.8   |

|                                        |         |                           |       |
|----------------------------------------|---------|---------------------------|-------|
| Ropinirole hydrochloride               | 55,179  | 53,061 [49,338-56,783]    | 4     |
| Pramipexole                            | 40,714  | 39,097 [36,056-42,138]    | 4.1   |
| Rasagiline mesilate                    | 17,117  | 16,718 [14,985-18,451]    | 2.4   |
| Levodopacarbidoapentacapone            | 13,263  | 12,310 [11,079-13,541]    | 7.7   |
| Amantadine hydrochloride               | 11,227  | 10,824 [9,956-11,692]     | 3.7   |
| Rotigotine                             | 11,262  | 10,953 [9,875-12,031]     | 2.8   |
| Trihexyphenidyl hydrochloride          | 10,613  | 10,022 [9,125-10,919]     | 5.9   |
| Entacapone                             | 4,280   | 3,830 [3,473-4,187]       | 11.8  |
| Tetrabenazine                          | 2,549   | 2,364 [2,075-2,653]       | 7.8   |
| Selegiline hydrochloride               | 2,433   | 2,357 [2,033-2,682]       | 3.2   |
| Riluzole                               | 1,796   | 1,693 [1,537-1,848]       | 6.1   |
| Opicapone                              | 1,923   | 2,639 [2,305-2,973]       | -27.1 |
| Safinamide                             | 1,430   | 1,617 [1,431-1,803]       | -11.6 |
| Apomorphine hydrochloride              | 925     | 942 [820-1,065]           | -1.9  |
| Piracetam                              | 663     | 613 [518-707]             | 8.2   |
| Orphenadrine hydrochloride             | 560     | 204 [-1,977-2,385]        | 174.8 |
| Tolcapone                              | 35      | 32 [7-57]                 | 9.3   |
| Apomorphine hydrochloride hemihydrate  | 34      | -4 [-34-26]               | -950  |
| Botulinum toxin type A                 | 21      | 15 [2-28]                 | 41.2  |
| Benzatropine mesilate                  | 15      | 19 [-5-44]                | -21.7 |
| 410 Drugs used in substance dependence | 316,976 | 286,944[253,663-320,226]  | 10.5  |
| Methadone hydrochloride                | 181,021 | 157,007 [142,247-171,766] | 15.3  |
| Buprenorphine hydrochloride            | 71,971  | 60,142 [55,863-64,421]    | 19.7  |
| Nicotine                               | 28,360  | 32,802 [20,717-44,887]    | -13.5 |
| Varenicline tartrate                   | 19,894  | 23,810 [16,741-30,880]    | -16.4 |
| Acamprosate calcium                    | 10,913  | 10,097 [9,048-11,146]     | 8.1   |
| Disulfiram                             | 2,370   | 2,254 [1,115-3,393]       | 5.2   |
| Bupropion hydrochloride                | 2,289   | 2,218 [2,001-2,434]       | 3.2   |

|                                                |           |                                |         |
|------------------------------------------------|-----------|--------------------------------|---------|
| Naltrexone hydrochloride                       | 1,385     | 1,370 [1,037-1,703]            | 1.1     |
| Buprenorph hydrochloridenaloxone hydrochloride | 689       | -9 [-1,843-1,825]              | -7662.9 |
| Nicotine bitartrate                            | 249       | 199 [77-321]                   | 25.2    |
| Nalmefene                                      | 86        | 186 [-143-515]                 | -53.8   |
| 411 Dementia                                   | 355,440   | 347,258[318,749-375,768]       | 2.4     |
| Donepezil hydrochloride                        | 179,466   | 174,866 [159,337-190,396]      | 2.6     |
| Memantine hydrochloride                        | 128,274   | 126,128 [116,480-135,775]      | 1.7     |
| Rivastigmine                                   | 33,776    | 32,761 [29,917-35,605]         | 3.1     |
| Galantamine                                    | 13,924    | 12,651 [10,895-14,408]         | 10.1    |
| 501 Antibacterial drugs                        | 2,382,500 | 2,466,909[2,037,822-2,895,995] | -3.4    |
| Amoxicillin                                    | 451,513   | 540,256 [314,154-766,359]      | -16.4   |
| Nitrofurantoin                                 | 344,338   | 357,314 [308,361-406,267]      | -3.6    |
| Doxycycline hyclate                            | 276,794   | 247,428 [206,657-288,199]      | 11.9    |
| Flucloxacillin sodium                          | 291,578   | 295,539 [244,101-346,976]      | -1.3    |
| Phenoxymethylpenicillin (Penicillin V)         | 145,125   | 216,532 [175,928-257,136]      | -33     |
| Clarithromycin                                 | 154,710   | 171,072 [130,224-211,920]      | -9.6    |
| Trimethoprim                                   | 132,036   | 97,605 [43,843-151,366]        | 35.3    |
| Co-amoxiclav (Amoxicillinclavulanic acid)      | 120,699   | 99,249 [73,875-124,623]        | 21.6    |
| Lymecycline                                    | 80,997    | 90,550 [81,732-99,367]         | -10.5   |
| Azithromycin                                   | 73,255    | 64,784 [59,734-69,833]         | 13.1    |
| Metronidazole                                  | 69,165    | 73,409 [65,429-81,388]         | -5.8    |
| Cefalexin                                      | 66,906    | 59,475 [47,404-71,546]         | 12.5    |
| Ciprofloxacin                                  | 45,820    | 40,959 [32,624-49,293]         | 11.9    |
| Oxytetracycline                                | 23,217    | 22,866 [18,010-27,721]         | 1.5     |
| Pivmecillinam hydrochloride                    | 23,364    | 23,748 [19,295-28,201]         | -1.6    |
| Erythromycin ethylsuccinate                    | 10,577    | 13,534 [1,612-25,457]          | -21.9   |
| Co-trimoxazole(Trimethoprim sulfamethoxazole)  | 17,176    | 15,449 [14,234-16,664]         | 11.2    |
| Methenamine hippurate                          | 9,905     | 7,428 [5,648-9,208]            | 33.3    |

|                                         |       |                     |        |
|-----------------------------------------|-------|---------------------|--------|
| Rifaximin                               | 7,258 | 6,576 [6,090-7,061] | 10.4   |
| Clindamycin hydrochloride               | 7,405 | 6,642 [5,707-7,577] | 11.5   |
| Fosfomycin trometamol                   | 5,983 | 5,990 [5,226-6,754] | -0.1   |
| Ofloxacin                               | 4,856 | 4,419 [3,332-5,505] | 9.9    |
| Colistimethate sodium                   | 3,343 | 2,815 [2,462-3,167] | 18.8   |
| Levofloxacin                            | 2,675 | 2,635 [2,316-2,953] | 1.5    |
| Sodium fusidate                         | 2,150 | 2,502 [1,768-3,236] | -14.1  |
| Dapsone                                 | 2,245 | 2,114 [1,905-2,323] | 6.2    |
| Tetracycline                            | 1,803 | 1,744 [1,359-2,129] | 3.4    |
| Minocycline hydrochloride               | 1,779 | 1,819 [1,118-2,519] | -2.2   |
| Cefradine                               | 1,717 | 1,335 [789-1,882]   | 28.6   |
| Rifampicin                              | 1,495 | 1,377 [1,135-1,620] | 8.5    |
| Isoniazid                               | 1,241 | 1,280 [834-1,726]   | -3     |
| Doxycycline monohydrate                 | 864   | 364 [-260-987]      | 137.4  |
| Erythromycin stearate                   | 674   | 1,571 [141-3,002]   | -57.1  |
| Cefaclor                                | 586   | 930 [289-1,570]     | -37    |
| Moxifloxacin                            | 448   | 430 [327-533]       | 4.1    |
| Demeclocycline hydrochloride            | 477   | 296 [-471-1,062]    | 61.3   |
| Ethambutol hydrochloride                | 438   | 416 [290-542]       | 5.2    |
| Vancomycin hydrochloride                | 482   | 326 [215-436]       | 48     |
| Cefuroxime axetil                       | 374   | 302 [146-458]       | 23.8   |
| Rifampicin combined preparations        | 121   | 161 [40-281]        | -24.7  |
| Tinidazole                              | 99    | 126 [6-245]         | -21.1  |
| Cefixime                                | 95    | 133 [-14-280]       | -28.5  |
| Linezolid                               | 178   | 87 [42-132]         | 104.8  |
| Ampicillin                              | 89    | 105 [31-180]        | -15.5  |
| Tobramycin                              | 94    | 56 [-7-120]         | 66.5   |
| Co-fluampicil(Flucloxacillinampicillin) | 127   | -366 [-1,066-334]   | -134.7 |

|                                        |         |                          |        |
|----------------------------------------|---------|--------------------------|--------|
| Ceftriaxone sodium                     | 87      | 49 [-18-117]             | 76.2   |
| Cefadroxil                             | 49      | -45 [-252-162]           | -209   |
| Teicoplanin                            | 54      | 45 [-96-186]             | 19.6   |
| Sulfadiazine                           | 27      | 5 [-173-183]             | 397.6  |
| Benzylpenicillin sodium (Penicillin G) | 17      | 43 [-13-99]              | -60.3  |
| Meropenem                              | 21      | 10 [-27-46]              | 110.9  |
| Fidaxomicin                            | 19      | 12 [0-24]                | 56.6   |
| Rifabutin                              | 27      | 14 [-3-31]               | 88.6   |
| Amoxicillin sodium                     | 16      | 10 [-12-32]              | 53.7   |
| Ertapenem sodium                       | 20      | 17 [-65-99]              | 17.9   |
| Ceftazidime pentahydrate               | 4       | 15 [-3-33]               | -73.3  |
| Clofazimine                            | 7       | 7 [1-14]                 | -6.2   |
| Pyrazinamide                           | 16      | 9 [-17-35]               | 82.3   |
| Norfloxacin                            | 6       | 11 [-32-53]              | -42.9  |
| Piperacillin sodium/tazobactam sodium  | 8       | 1 [-106-108]             | 662    |
| Cefotaxime sodium                      | 1       | 5 [-7-17]                | -79.7  |
| Aztreonam                              | 3       | 0 [-6-6]                 | 1294.4 |
| Cefuroxime sodium                      | 22      | 11 [-4-25]               | 107.2  |
| Amikacin                               | 1       | 3 [-13-18]               | -61.3  |
| Daptomycin                             | 1       | 0 [-26-26]               | 1105.9 |
| Cycloserine                            | 1       | 0 [-3-3]                 | 309.5  |
| Pristinamycin                          | 2       | -2 [-8-4]                | -188.7 |
| Aminosalicylic acid                    | 2       | 0 [-17-18]               | 1204.6 |
| 502 Antifungal drugs                   | 130,415 | 130,927[115,964-145,889] | -0.4   |
| Nystatin                               | 57,854  | 53,088 [44,972-61,203]   | 9      |
| Terbinafine hydrochloride              | 35,939  | 45,945 [37,593-54,297]   | -21.8  |
| Fluconazole                            | 41,932  | 40,825 [36,195-45,455]   | 2.7    |
| Itraconazole                           | 6,439   | 7,643 [6,332-8,954]      | -15.8  |



|                                              |        |                        |        |
|----------------------------------------------|--------|------------------------|--------|
| Griseofulvin                                 | 274    | 311 [174-449]          | -12    |
| Voriconazole                                 | 47     | 27 [-9-62]             | 77.3   |
| Posaconazole                                 | 34     | 28 [-6-61]             | 23.2   |
| Amphotericin                                 | 5      | 9 [-2-19]              | -41.4  |
| 503 Antiviral drugs                          | 82,978 | 87,564[79,401-95,727]  | -5.2   |
| Aciclovir                                    | 86,376 | 90,746 [84,365-97,127] | -4.8   |
| Valaciclovir                                 | 3,663  | 3,796 [3,498-4,094]    | -3.5   |
| Oseltamivir phosphate                        | 262    | 248 [-11,141-11,638]   | 5.4    |
| Famciclovir                                  | 542    | 485 [352-617]          | 11.8   |
| Lamivudine                                   | 313    | 320 [264-377]          | -2.3   |
| Entecavir                                    | 126    | 102 [47-157]           | 23.4   |
| Tenofovir disoproxil                         | 142    | 112 [67-156]           | 27.3   |
| Valganciclovir hydrochloride                 | 65     | 49 [11-86]             | 33.5   |
| Zanamivir                                    | 3      | 11 [-15-37]            | -72.9  |
| Inosine pranobex                             | 19     | 20 [5-35]              | -3.5   |
| Emtricitabine and tenofovir disoproxil       | 18     | 15 [-1-30]             | 22.6   |
| Efavirenz/emtricitabine/tenofovir disoproxil | 11     | 5 [-4-15]              | 104.4  |
| Darunavir                                    | 2      | 2 [-12-15]             | 29.7   |
| Raltegravir                                  | 14     | 13 [-1-26]             | 11.3   |
| Abacavir and lamivudine                      | 3      | 2 [-4-7]               | 92     |
| Adefovir dipivoxil                           | 5      | 3 [-6-12]              | 56.9   |
| Lopinavir and ritonavir                      | 2      | 0 [-3-4]               | 897.4  |
| Emtricitabine and tenofovir alafenamide      | 3      | 4 [1-7]                | -26.9  |
| Dolutegravir                                 | 6      | 6 [-1-13]              | 2.7    |
| Ritonavir                                    | 3      | 2 [-11-15]             | 44.1   |
| Nevirapine                                   | 2      | 3 [-2-7]               | -23.4  |
| Other HIV infection preparations             | 9      | 7 [-2-16]              | 36.9   |
| Zidovudine                                   | 2      | 0 [-3-2]               | -608.2 |

|                                         |           |                                 |        |
|-----------------------------------------|-----------|---------------------------------|--------|
| Maraviroc                               | 2         | 1 [-3-5]                        | 60.7   |
| 504 Antiprotozoal drugs                 | 233,548   | 226,229[200,476-251,981]        | 3.2    |
| Quinine sulfate                         | 207,851   | 206,595 [185,165-228,025]       | 0.6    |
| Quinine bisulfate                       | 25,256    | 26,587 [17,067-36,107]          | -5     |
| Mepacrine hydrochloride                 | 213       | 102 [38-166]                    | 108.9  |
| Chloroquine phosphate                   | 119       | 93 [28-158]                     | 27.8   |
| Proguanil hydrochloride with atovaquone | 19        | 29 [-119-176]                   | -33.6  |
| Atovaquone                              | 43        | 30 [6-54]                       | 41.1   |
| Mefloquine hydrochloride                | 19        | -293 [-1,180-593]               | -106.5 |
| Pyrimethamine                           | 23        | 18 [5-31]                       | 27.9   |
| Proguanil hydrochloride                 | 2         | -7 [-33-20]                     | -129.3 |
| Primaquine                              | 1         | -1 [-4-2]                       | -204.2 |
| 505 Anthelmintics                       | 6,591     | 6,135[3,863-8,407]              | 7.4    |
| Mebendazole                             | 6,493     | 6,043 [3,783-8,303]             | 7.4    |
| Albendazole                             | 26        | 22 [5-39]                       | 19.4   |
| Levamisole hydrochloride                | 22        | 22 [-1-46]                      | -1.5   |
| Praziquantel                            | 12        | 6 [-7-20]                       | 98.4   |
| 601 Drugs used in diabetes              | 4,876,206 | 4,788,040[4,454,228-5,121,853]  | 1.8    |
| Metformin hydrochloride                 | 1,921,774 | 1,891,031 [1,758,150-2,023,912] | 1.6    |
| Glucose blood testing reagents          | 558,495   | 535,033 [484,750-585,315]       | 4.4    |
| Gliclazide                              | 554,774   | 537,185 [490,384-583,986]       | 3.3    |
| Insulin aspart                          | 163,778   | 160,715 [148,784-172,645]       | 1.9    |
| Sitagliptin                             | 201,011   | 198,099 [177,263-218,934]       | 1.5    |
| Linagliptin                             | 192,489   | 197,939 [182,558-213,319]       | -2.8   |
| Insulin glargine                        | 135,519   | 129,665 [120,045-139,285]       | 4.5    |
| Empagliflozin                           | 140,767   | 141,498 [134,690-148,306]       | -0.5   |
| Alogliptin                              | 130,190   | 136,725 [125,569-147,880]       | -4.8   |
| Dapagliflozin                           | 105,899   | 108,006 [90,755-125,258]        | -2     |

|                                    |        |                        |      |
|------------------------------------|--------|------------------------|------|
| Biphasic insulin aspart            | 66,008 | 62,123 [56,379-67,866] | 6.3  |
| Biphasic isophane insulin          | 60,913 | 59,741 [53,449-66,033] | 2    |
| Insulin detemir                    | 50,481 | 49,849 [44,884-54,814] | 1.3  |
| Pioglitazone hydrochloride         | 59,355 | 57,807 [48,112-67,501] | 2.7  |
| Isophane insulin                   | 55,727 | 54,391 [48,785-59,996] | 2.5  |
| Dulaglutide                        | 54,694 | 57,587 [55,403-59,771] | -5   |
| Glimepiride                        | 49,528 | 46,359 [41,707-51,010] | 6.8  |
| Canagliflozin                      | 47,047 | 49,169 [42,068-56,271] | -4.3 |
| Insulin Lispro                     | 35,838 | 35,577 [32,891-38,262] | 0.7  |
| Insulin degludec                   | 36,699 | 39,168 [35,732-42,604] | -6.3 |
| Liraglutide                        | 40,449 | 44,232 [38,926-49,537] | -8.6 |
| Ketone blood testing reagents      | 29,030 | 24,213 [22,539-25,887] | 19.9 |
| Glucose                            | 27,291 | 27,316 [25,111-29,521] | -0.1 |
| Biphasic insulin lispro            | 26,519 | 26,388 [23,676-29,099] | 0.5  |
| Semaglutide                        | 23,871 | 25,304 [21,638-28,970] | -5.7 |
| Saxagliptin                        | 15,853 | 15,511 [12,811-18,211] | 2.2  |
| Metformin hydrochloridesitagliptin | 13,267 | 12,901 [11,510-14,293] | 2.8  |
| Insulin glulisine                  | 7,788  | 7,843 [7,093-8,593]    | -0.7 |
| Urine testing reagents             | 9,729  | 5,728 [4,757-6,699]    | 69.9 |
| Exenatide                          | 7,913  | 7,898 [5,757-10,038]   | 0.2  |
| Glucagon                           | 5,929  | 6,265 [5,236-7,295]    | -5.4 |
| Alogliptinmetformin                | 6,364  | 6,978 [6,234-7,722]    | -8.8 |
| Linagliptinmetformin               | 5,088  | 5,368 [4,725-6,011]    | -5.2 |
| Empagliflozinmetformin             | 4,991  | 5,405 [4,991-5,820]    | -7.7 |
| Repaglinide                        | 4,385  | 4,082 [3,616-4,549]    | 7.4  |
| Soluble insulin (Neutral insulin)  | 3,465  | 3,076 [2,656-3,496]    | 12.6 |
| Vildagliptin                       | 3,776  | 3,438 [2,598-4,277]    | 9.8  |
| Dapagliflozinmetformin             | 3,531  | 3,628 [3,316-3,940]    | -2.7 |

|                                           |           |                                 |        |
|-------------------------------------------|-----------|---------------------------------|--------|
| Metformin hydrochloridevildagliptin       | 3,594     | 3,387 [2,907-3,867]             | 6.1    |
| Lixisenatide                              | 3,092     | 2,994 [770-5,217]               | 3.3    |
| Glipizide                                 | 2,463     | 2,198 [-1,197-5,593]            | 12.1   |
| Acarbose                                  | 2,407     | 2,147 [1,699-2,596]             | 12.1   |
| Metformin hydrochloridepioglitazone       | 2,150     | 1,816 [512-3,120]               | 18.4   |
| Ins degludecliraglutide                   | 2,009     | 2,080 [1,764-2,396]             | -3.4   |
| Tolbutamide                               | 1,445     | 1,306 [708-1,904]               | 10.6   |
| Canagliflozinmetformin                    | 1,051     | 1,096 [931-1,260]               | -4.1   |
| Saxagliptinmetformin                      | 863       | 887 [581-1,192]                 | -2.7   |
| Saxagliptindapagliflozin                  | 805       | 978 [633-1,324]                 | -17.7  |
| Nateglinide                               | 534       | 492 [363-621]                   | 8.5    |
| Ertugliflozin                             | 411       | 479 [332-625]                   | -14.2  |
| Diazoxide                                 | 158       | 93 [5-181]                      | 70.8   |
| Glibenclamide                             | 106       | 205 [-1,387-1,798]              | -48.4  |
| Empagliflozinlinagliptin                  | 117       | 140 [96-185]                    | -16.5  |
| Insulin glarginelixisenatide              | 56        | 25 [11-38]                      | 125.8  |
| Glucose and ketone blood testing reagents | 6         | 8 [-47-62]                      | -21.1  |
| Insulin human                             | 12        | 7 [-13-26]                      | 77     |
| 602 Thyroid and antithyroid drugs         | 2,823,882 | 2,806,353[2,614,744-2,997,963]  | 0.6    |
| Levothyroxine sodium                      | 2,765,154 | 2,750,937 [2,563,017-2,938,856] | 0.5    |
| Carbimazole                               | 50,125    | 48,120 [44,822-51,419]          | 4.2    |
| Liothyronine sodium                       | 4,803     | 4,161 [3,562-4,759]             | 15.4   |
| Propylthiouracil                          | 3,486     | 3,206 [2,885-3,528]             | 8.7    |
| Levothyroxine sodium and liothyronine     | 314       | 206 [132-280]                   | 52.1   |
| Iodine                                    | 1         | -2 [-9-6]                       | -166.5 |
| 603 Corticosteroids (endocrine)           | 658,532   | 686,295[617,036-755,553]        | -4     |
| Prednisolone                              | 574,235   | 612,617 [542,292-682,942]       | -6.3   |
| Dexamethasone                             | 138,060   | 164,858 [139,576-190,141]       | -16.3  |

|                                        |         |                           |        |
|----------------------------------------|---------|---------------------------|--------|
| Fludrocortisone acetate                | 47,807  | 45,578 [42,330-48,827]    | 4.9    |
| Betamethasone sodium phosphate         | 17,773  | 21,737 [15,801-27,672]    | -18.2  |
| Hydrocortisone sodium phosphate        | 1,205   | 716 [-353-1,785]          | 68.3   |
| Hydrocortisone sodium succinate        | 883     | 844 [310-1,378]           | 4.6    |
| Dexamethasone phosphate                | 1,159   | 971 [601-1,340]           | 19.4   |
| Deflazacort                            | 421     | 411 [347-476]             | 2.3    |
| Methylprednisolone                     | 376     | 412 [309-515]             | -8.7   |
| Dexamethasone sodium phosphate         | 94      | 46 [-111-203]             | 102.7  |
| Prednisone                             | 5       | -56 [-153-41]             | -108.9 |
| Methylprednisolone sodium succinate    | 5       | 3 [-10-16]                | 73.1   |
| Cortisone acetate                      | 6       | 6 [-2-14]                 | 2.6    |
| 604 Sex hormones                       | 712,808 | 737,806[685,834-789,778]  | -3.4   |
| Finasteride                            | 327,786 | 323,636 [301,511-345,761] | 1.3    |
| Estradiol                              | 209,526 | 222,783 [204,586-240,981] | -6     |
| Estradiol with progestogen             | 91,425  | 119,620 [100,923-138,318] | -23.6  |
| Progesterone                           | 27,947  | 30,835 [27,193-34,478]    | -9.4   |
| Norethisterone                         | 31,806  | 42,586 [33,243-51,929]    | -25.3  |
| Dutasteride                            | 24,701  | 23,714 [19,777-27,652]    | 4.2    |
| Testosterone                           | 23,182  | 21,679 [19,066-24,292]    | 6.9    |
| Tibolone                               | 15,517  | 15,937 [14,344-17,531]    | -2.6   |
| Oestrogens conjugated                  | 14,254  | 14,508 [12,057-16,959]    | -1.8   |
| Estradiol valerate                     | 12,068  | 7,815 [-1,544-17,174]     | 54.4   |
| Testosterone undecanoate               | 10,607  | 11,597 [10,128-13,066]    | -8.5   |
| Testosterone esters                    | 4,066   | 4,389 [3,907-4,870]       | -7.4   |
| Raloxifene hydrochloride               | 4,033   | 3,691 [3,121-4,261]       | 9.3    |
| Oestrogens conjugated with progestogen | 2,466   | 946 [-5,155-7,047]        | 160.7  |
| Estradiol and estriol with progestogen | 707     | 711 [409-1,012]           | -0.5   |
| Testosterone enantate                  | 667     | 641 [422-860]             | 4.1    |

|                                                           |         |                           |        |
|-----------------------------------------------------------|---------|---------------------------|--------|
| Prasterone                                                | 121     | 49 [17-81]                | 147.7  |
| Oestrogens conjugated with bazedoxifene                   | 49      | 38 [11-66]                | 27.6   |
| Ethinylestradiol                                          | 23      | -74 [-237-90]             | -131.2 |
| Nandrolone decanoate                                      | 1       | 7 [-7-22]                 | -86.1  |
| Oxandrolone                                               | 4       | 2 [-4-8]                  | 82.8   |
| Dydrogesterone                                            | 2       | 1 [-5-6]                  | 220    |
| Estradiol, estriol and estrone                            | 2       | -973 [-2,825-879]         | -100.2 |
| 605 Hypothalamic and pituitary hormones and antioestrogen | 29,538  | 30,097[27,598-32,595]     | -1.9   |
| Desmopressin acetate                                      | 24,855  | 25,307 [23,281-27,333]    | -1.8   |
| Somatropin                                                | 4,413   | 4,238 [3,671-4,805]       | 4.1    |
| Clomifene citrate                                         | 208     | 185 [78-292]              | 12.4   |
| Choriogonadotropin alfa                                   | 14      | 15 [0-29]                 | -4.6   |
| Tolvaptan                                                 | 19      | 11 [-16-39]               | 70.9   |
| Menotrophin                                               | 13      | 6 [-7-19]                 | 119.2  |
| Tetracosactide                                            | 12      | 14 [-4-32]                | -14.7  |
| Chorionic gonadotrophin                                   | 2       | -5 [-63-52]               | -136.6 |
| Follitropin alfa                                          | 1       | 3 [-3-10]                 | -69.4  |
| 606 Drugs affecting bone metabolism                       | 568,595 | 533,658[483,329-583,987]  | 6.5    |
| Alendronic acid                                           | 495,630 | 477,105 [433,924-520,286] | 3.9    |
| Risedronate sodium                                        | 52,313  | 49,666 [45,355-53,978]    | 5.3    |
| Ibandronic acid                                           | 14,119  | 13,527 [12,025-15,029]    | 4.4    |
| Denosumab                                                 | 5,046   | 6,216 [5,611-6,821]       | -18.8  |
| Sodium clodronate                                         | 868     | 741 [491-991]             | 17.2   |
| Alendronic acidcolecalciferol                             | 372     | 351 [154-549]             | 5.9    |
| Strontium ranelate                                        | 137     | -441 [-3,435-2,553]       | -131.1 |
| Teriparatide                                              | 67      | 61 [34-89]                | 9.2    |
| Other bisphosphonate and other preparations               | 30      | 15 [-4-34]                | 96.4   |
| Zoledronic acid                                           | 6       | 0 [-10-10]                | 3984.9 |

|                                                |         |                           |         |
|------------------------------------------------|---------|---------------------------|---------|
| Calcitonin (Salmon)                            | 7       | 7 [-9-23]                 | -0.8    |
| 607 Other endocrine drugs                      | 7,987   | 7,609[7,046-8,171]        | 5       |
| Cabergoline                                    | 6,631   | 6,189 [5,737-6,640]       | 7.1     |
| Bromocriptine                                  | 890     | 922 [768-1,075]           | -3.5    |
| Quinagolide hydrochloride                      | 390     | 349 [275-422]             | 11.9    |
| Danazol                                        | 383     | 370 [294-446]             | 3.5     |
| Metyrapone                                     | 106     | 80 [35-124]               | 33.3    |
| Nafarelin acetate                              | 72      | 60 [33-87]                | 19.8    |
| Buserelin                                      | 14      | 8 [-1-16]                 | 85.3    |
| 701 Drugs used in obstetrics                   | 1       | 0[-3-2]                   | -318.6  |
| Misoprostol (Gynaecology)                      | 1       | 0 [-2-2]                  | -1867.9 |
| 702 Treatment of vaginal and vulval conditions | 197,893 | 214,795[196,323-233,267]  | -7.9    |
| Clotrimazole                                   | 106,674 | 112,325 [94,006-130,645]  | -5      |
| Estriol                                        | 50,159  | 57,323 [52,980-61,666]    | -12.5   |
| Econazole nitrate                              | 616     | 579 [369-788]             | 6.5     |
| Dequalinium chloride                           | 56      | 104 [19-189]              | -46.2   |
| Ospemifene                                     | 45      | 81 [64-99]                | -44.6   |
| Fenticonazole nitrate                          | 10      | 6 [-15-27]                | 62      |
| Boric acid                                     | 4       | 2 [-1-6]                  | 78.9    |
| 703 Contraceptives                             | 605,660 | 645,288[586,639-703,938]  | -6.1    |
| Desogestrel                                    | 257,460 | 240,694 [219,893-261,495] | 7       |
| Combined ethinylestradiol 30mcg                | 204,321 | 227,459 [203,828-251,090] | -10.2   |
| Medroxyprogesterone acetate                    | 70,870  | 88,909 [81,045-96,773]    | -20.3   |
| Combined ethinylestradiol 20mcg                | 30,095  | 31,120 [27,364-34,876]    | -3.3    |
| Combined ethinylestradiol 35mcg                | 18,986  | 21,520 [17,586-25,453]    | -11.8   |
| Levonorgestrel                                 | 9,833   | 20,186 [16,289-24,083]    | -51.3   |
| Etonogestrel                                   | 2,076   | 10,842 [9,080-12,605]     | -80.9   |
| Phased formulations of ethinylestradiol        | 2,675   | 2,613 [1,487-3,739]       | 2.4     |

|                                                   |           |                                 |        |
|---------------------------------------------------|-----------|---------------------------------|--------|
| Ulipristal acetate (Emergency Contraceptive)      | 1,786     | 3,055 [1,526-4,584]             | -41.5  |
| Etonogestrel ethinylestradiol                     | 1,409     | 1,460 [1,203-1,717]             | -3.5   |
| Estradiol valandestradiol valerate with dienogest | 802       | 813 [694-932]                   | -1.4   |
| Nonoxinol 9                                       | 89        | 96 [30-162]                     | -7.4   |
| Combined mestranol                                | 86        | 83 [42-124]                     | 3.7    |
| Estradiol and norgestrel                          | 32        | -143 [-332-46]                  | -122.4 |
| 704 Drugs used for genito-urinary disorders       | 1,726,575 | 1,730,962 [1,582,857-1,879,067] | -0.3   |
| Tamsulosin hydrochloride                          | 664,859   | 654,544 [610,415-698,673]       | 1.6    |
| Sildenafil (Erectile Dysfunction)                 | 262,672   | 316,197 [257,340-375,055]       | -16.9  |
| Solifenacin                                       | 208,064   | 197,850 [183,145-212,556]       | 5.2    |
| Mirabegron                                        | 134,472   | 135,368 [123,839-146,897]       | -0.7   |
| Oxybutynin                                        | 120,999   | 118,515 [107,538-129,491]       | 2.1    |
| Tolterodine                                       | 107,291   | 107,820 [98,801-116,838]        | -0.5   |
| Tadalafil                                         | 62,371    | 66,930 [60,826-73,034]          | -6.8   |
| Alfuzosin hydrochloride                           | 40,767    | 38,655 [35,096-42,213]          | 5.5    |
| Trospium chloride                                 | 26,203    | 25,982 [23,249-28,715]          | 0.9    |
| Fesoterodine fumarate                             | 19,438    | 18,948 [17,302-20,593]          | 2.6    |
| Tamsulosin and dutasteride hydrochloride          | 13,078    | 12,775 [9,553-15,997]           | 2.4    |
| Darifenacin hydrobromide                          | 11,606    | 12,762 [10,584-14,939]          | -9.1   |
| Alprostadil                                       | 7,978     | 7,628 [5,726-9,530]             | 4.6    |
| Vardenafil                                        | 5,932     | 6,055 [4,436-7,674]             | -2     |
| Solifenacintamsulosin                             | 4,378     | 4,488 [3,459-5,516]             | -2.4   |
| Indoramin                                         | 3,379     | 3,139 [2,525-3,752]             | 7.7    |
| Propiverine hydrochloride                         | 2,620     | 2,364 [2,058-2,670]             | 10.8   |
| Potassium citrate                                 | 2,068     | 1,829 [1,568-2,090]             | 13.1   |
| Flavoxate hydrochloride                           | 1,401     | 1,233 [979-1,487]               | 13.6   |
| Avanafil                                          | 749       | 848 [537-1,160]                 | -11.7  |
| Phentolamine epiptadil                            | 444       | 561 [452-670]                   | -20.8  |



|                                                                            |         |                        |         |
|----------------------------------------------------------------------------|---------|------------------------|---------|
| Dapoxetine hydrochloride                                                   | 381     | 569 [435-703]          | -33.1   |
| Sodium citrate                                                             | 99      | 113 [52-173]           | -12.1   |
| Chlorhexidine acetate                                                      | 92      | 77 [-88-242]           | 19.8    |
| Bethanechol chloride                                                       | 75      | 52 [25-79]             | 44.2    |
| Other urological pain preparations                                         | 12      | 15 [-1-30]             | -17.9   |
| Distigmine bromide                                                         | 8       | 7 [-7-21]              | 13.5    |
| Yohimbine hydrochloride                                                    | 2       | 3 [-7-12]              | -27     |
| Oxybutynin hydrochloride                                                   | 1       | 2 [-2-7]               | -55     |
| 801 Cytotoxic drugs (malignancy and immunosuppression)                     | 16,693  | 15,730[14,582-16,879]  | 6.1     |
| Hydroxycarbamide                                                           | 8,285   | 7,523 [6,913-8,133]    | 10.1    |
| Mercaptopurine                                                             | 5,785   | 5,503 [4,958-6,048]    | 5.1     |
| Calcium folinate                                                           | 243     | 265 [219-311]          | -8.3    |
| Cyclophosphamide                                                           | 24      | 13 [-42-69]            | 77.9    |
| Tioguanine                                                                 | 2       | 2 [-5-9]               | 9.7     |
| Imatinib mesilate                                                          | 3       | 0 [-14-14]             | -2356.1 |
| Everolimus                                                                 | 1       | 1 [-1-4]               | -24.3   |
| Mitotane                                                                   | 2       | 0 [-4-5]               | 451.3   |
| Mesna                                                                      | 2       | 0 [-5-5]               | -671.2  |
| Chlorambucil                                                               | 1       | 0 [-15-16]             | 198.7   |
| Dasatinib                                                                  | 2       | 1 [-8-11]              | 72.7    |
| Estramustine phosphate                                                     | 1       | 0 [-1-2]               | 308     |
| Busulfan                                                                   | 1       | 2 [-3-6]               | -37.2   |
| Procarbazine hydrochloride                                                 | 1       | 2 [-2-5]               | -34     |
| 802 Drugs affecting the immune response (malignancy and immunosuppression) | 106,795 | 95,095[87,448-102,742] | 12.3    |
| Azathioprine                                                               | 72,608  | 65,181 [60,228-70,134] | 11.4    |
| Tacrolimus                                                                 | 24,992  | 24,115 [21,780-26,449] | 3.6     |
| Mycophenolate mofetil                                                      | 17,427  | 15,777 [14,526-17,029] | 10.5    |
| Ciclosporin                                                                | 5,387   | 4,589 [3,309-5,868]    | 17.4    |

|                                                |         |                          |        |
|------------------------------------------------|---------|--------------------------|--------|
| Mycophenolic sodium                            | 719     | 644 [465-823]            | 11.7   |
| Sirolimus                                      | 593     | 509 [373-646]            | 16.4   |
| Dimethyl fumar                                 | 14      | 6 [-10-23]               | 119.5  |
| Peginterferon alpha                            | 3       | 2 [-18-22]               | 88.1   |
| Fingolimod                                     | 2       | 1 [-4-7]                 | 38.4   |
| Interferon alpha                               | 1       | 1 [-6-8]                 | 5.9    |
| Thalidomide (Immunomodulating)                 | 2       | 0 [-6-6]                 | 4540   |
| Lenalidomide                                   | 1       | 1 [-4-6]                 | 13.4   |
| Glatiramer acetate                             | 1       | 0 [-3-3]                 | 1320.4 |
| 803 Sex hormones and antagonists in malignancy | 277,021 | 263,429[247,003-279,856] | 5.2    |
| Letrozole                                      | 82,834  | 79,085 [74,303-83,868]   | 4.7    |
| Tamoxifen citrate                              | 55,196  | 54,323 [49,799-58,847]   | 1.6    |
| Anastrozole                                    | 49,045  | 46,784 [43,500-50,068]   | 4.8    |
| Bicalutamide                                   | 21,373  | 18,706 [17,311-20,100]   | 14.3   |
| Goserelin acetate                              | 20,454  | 19,842 [17,270-22,414]   | 3.1    |
| Leuprorelin acetate                            | 19,067  | 17,944 [15,970-19,918]   | 6.3    |
| Exemestane                                     | 12,512  | 12,074 [11,211-12,937]   | 3.6    |
| Triptorelin acetate                            | 7,238   | 3,467 [217-6,716]        | 108.8  |
| Cyproterone acetate                            | 2,727   | 2,474 [2,128-2,820]      | 10.2   |
| Degarelix                                      | 1,975   | 1,813 [1,624-2,002]      | 8.9    |
| Triptorelin embonate                           | 1,201   | 939 [749-1,129]          | 27.9   |
| Octreotide acetate                             | 694     | 504 [360-647]            | 37.8   |
| Megestrol acetate                              | 433     | 321 [-152-795]           | 34.7   |
| Diethylstilbestrol                             | 458     | 351 [22-680]             | 30.5   |
| Lanreotide                                     | 381     | 312 [233-391]            | 22.1   |
| Flutamide                                      | 66      | -34 [-282-214]           | -296.2 |
| Fulvestrant                                    | 44      | 42 [15-69]               | 5.1    |
| Toremifene citrate                             | 12      | 17 [1-34]                | -31.1  |

|                                          |           |                                |        |
|------------------------------------------|-----------|--------------------------------|--------|
| Buserelin                                | 14        | 8 [-1-16]                      | 85.3   |
| Enzalutamide                             | 3         | 5 [-6-16]                      | -42    |
| Abiraterone                              | 2         | 2 [-3-8]                       | -19.3  |
| 901 Anaemias and other blood disorders   | 1,607,183 | 1,619,365[1,500,462-1,738,268] | -0.8   |
| Folic acid                               | 682,994   | 680,663 [617,211-744,115]      | 0.3    |
| Ferrous fumarate                         | 377,590   | 396,776 [319,216-474,336]      | -4.8   |
| Ferrous sulfate                          | 238,373   | 216,119 [147,198-285,039]      | 10.3   |
| Hydroxocobalamin                         | 143,925   | 232,277 [210,762-253,791]      | -38    |
| Cyanocobalamin                           | 123,126   | 84,637 [78,214-91,061]         | 45.5   |
| Ferrous gluconate                        | 24,753    | 24,095 [20,982-27,209]         | 2.7    |
| Sodium feredetate                        | 11,010    | 15,983 [13,718-18,249]         | -31.1  |
| Iron and folic acid                      | 2,644     | 2,892 [2,380-3,405]            | -8.6   |
| Other oral iron preparations             | 1,318     | 1,172 [736-1,607]              | 12.5   |
| Ferric maltol                            | 528       | 525 [445-606]                  | 0.5    |
| Darbepoetin alfa                         | 392       | 252 [27-477]                   | 55.6   |
| Anagrelide hydrochloride                 | 119       | 113 [50-176]                   | 5.1    |
| Iron dextran                             | 52        | 49 [-12-110]                   | 6.9    |
| Epoetin alfa                             | 96        | 63 [27-99]                     | 52.4   |
| Epoetin beta                             | 83        | 41 [-36-119]                   | 100.6  |
| Deferasirox                              | 21        | 12 [-11-35]                    | 76.7   |
| Methoxy polyethylene glycol-epoetin beta | 9         | 14 [-3-31]                     | -36.1  |
| Deferiprone                              | 4         | 5 [-21-30]                     | -11.2  |
| Filgrastim                               | 14        | 7 [-5-20]                      | 87.1   |
| Lenograstim                              | 4         | 3 [-8-14]                      | 42.8   |
| Iron sucrose                             | 7         | 7 [-3-17]                      | -1.4   |
| Eltrombopag                              | 7         | 6 [-6-19]                      | 8.2    |
| Iron carboxymaltose                      | 3         | -1 [-8-6]                      | -345.4 |
| Desferrioxamine mesilate                 | 1         | 1 [-5-6]                       | 74.8   |

|                                          |         |                           |        |
|------------------------------------------|---------|---------------------------|--------|
| Epoetin zeta                             | 1       | -1 [-7-5]                 | -218.5 |
| 902 Fluids and electrolytes              | 104,970 | 94,970[82,109-107,831]    | 10.5   |
| Sodium bicarbonate                       | 42,455  | 40,873 [37,999-43,747]    | 3.9    |
| Sodium chloride                          | 29,946  | 25,296 [22,759-27,833]    | 18.4   |
| Water for injection                      | 27,780  | 15,423 [13,356-17,490]    | 80.1   |
| Oral rehydration salts                   | 14,851  | 22,091 [11,764-32,417]    | -32.8  |
| Potassium chloride                       | 7,875   | 7,871 [5,301-10,440]      | 0.1    |
| Calcium polystyrene sulfonate            | 174     | 192 [140-244]             | -9.4   |
| Patiromer calcium                        | 35      | 38 [29-46]                | -7.1   |
| Potassium bicarbonate                    | 19      | 66 [21-110]               | -71.1  |
| Sodium polystyrene sulfonate             | 17      | 10 [-4-24]                | 63.9   |
| 904 Oral nutrition                       | 445,020 | 379,326[306,919-451,733]  | 17.3   |
| Enteral nutrition                        | 323,611 | 285,846 [237,985-333,707] | 13.2   |
| Other food for special diet preparations | 71,040  | 67,798 [55,582-80,014]    | 4.8    |
| Gluten free bread                        | 25,029  | 21,312 [12,006-30,619]    | 17.4   |
| Gluten free mixes                        | 10,767  | 8,571 [5,702-11,441]      | 25.6   |
| Low protein mixes                        | 1,685   | 1,424 [980-1,869]         | 18.3   |
| Gluten freelow protein bread             | 997     | 964 [723-1,205]           | 3.4    |
| Gluten freelow protein pasta             | 837     | 716 [594-838]             | 16.9   |
| Low protein pasta                        | 984     | 807 [631-982]             | 22     |
| Low protein biscuits                     | 850     | 856 [683-1,029]           | -0.7   |
| Maltodextrin                             | 653     | 585 [319-850]             | 11.7   |
| Low protein bread                        | 604     | 577 [366-788]             | 4.7    |
| Gluten freelow protein biscuits          | 441     | 352 [170-534]             | 25.4   |
| Low protein meals                        | 299     | 300 [198-402]             | -0.4   |
| Gluten freelow protein mixes             | 233     | 212 [146-278]             | 9.7    |
| Low protein cakes                        | 200     | 203 [109-297]             | -1.5   |
| Low protein cereals                      | 252     | 248 [179-317]             | 1.5    |

|                                              |        |                        |        |
|----------------------------------------------|--------|------------------------|--------|
| Gluten freelow protein grainsflours          | 241    | 205 [161-249]          | 17.6   |
| Low protein desserts                         | 233    | 171 [101-241]          | 36.1   |
| Low protein grainsflours                     | 195    | 153 [104-202]          | 27.6   |
| Gluten freewheat free grainsflours           | 162    | 96 [-173-364]          | 69.3   |
| Gluten freelow protein cereals               | 111    | 126 [87-165]           | -11.9  |
| Low protein cooking aids                     | 128    | 98 [60-136]            | 30.5   |
| Low protein snacks                           | 82     | 65 [34-95]             | 27.1   |
| Low protein miscellaneous                    | 52     | 53 [32-74]             | -1.8   |
| Gluten freelow protein drink                 | 17     | 0 [0-0]                | Inf    |
| Gluten free pasta                            | 10     | -166 [-774-443]        | -106   |
| Low protein risotto                          | 8      | 5 [-1-11]              | 50.1   |
| Gluten freewheat free biscuits               | 1      | -1,570 [-3,874-734]    | -100.1 |
| Fructose                                     | 1      | 3 [0-6]                | -69.2  |
| Glten free wheatfree lowprotein cooking aids | 3      | 0 [-5-5]               | 1042.4 |
| Gluten freelow protein cooking aids          | 1      | 0 [-36-36]             | -750.1 |
| 905 Minerals                                 | 81,254 | 76,761[70,041-83,480]  | 5.9    |
| Calcium carbonate                            | 35,727 | 32,905 [30,061-35,749] | 8.6    |
| Sodium fluoride                              | 11,384 | 10,821 [9,169-12,474]  | 5.2    |
| Sevelamer                                    | 6,551  | 6,346 [5,596-7,097]    | 3.2    |
| Calcium acetate                              | 5,994  | 5,871 [5,192-6,549]    | 2.1    |
| Magnesium aspartate                          | 4,214  | 3,961 [3,515-4,407]    | 6.4    |
| Cinacalcet hydrochloride                     | 4,735  | 4,273 [3,866-4,680]    | 10.8   |
| Magnesium glycerophosphate                   | 3,773  | 3,443 [2,759-4,127]    | 9.6    |
| Zinc sulfate monohydrate                     | 2,148  | 2,002 [1,781-2,224]    | 7.3    |
| Other phosphate supplement preparations      | 1,316  | 1,326 [1,171-1,480]    | -0.7   |
| Other calcium supplement preparations        | 973    | 1,720 [1,022-2,418]    | -43.4  |
| Zinc sulfate                                 | 1,129  | 1,001 [810-1,192]      | 12.8   |
| Lanthanum carbonate                          | 1,139  | 1,117 [923-1,312]      | 1.9    |

|                                        |           |                                 |       |
|----------------------------------------|-----------|---------------------------------|-------|
| Calcium acetatemagnesium carbonate     | 777       | 728 [599-857]                   | 6.7   |
| Other selenium preparations            | 742       | 641 [481-802]                   | 15.7  |
| Magnesium citrate                      | 589       | 511 [388-634]                   | 15.3  |
| Calcium lactate                        | 203       | 260 [190-329]                   | -21.9 |
| Calcium gluconate                      | 127       | 136 [79-193]                    | -6.6  |
| Selenium                               | 92        | 94 [55-133]                     | -2.1  |
| Sucroferric oxyhydroxide               | 94        | 103 [68-138]                    | -8.7  |
| Other zinc preparations                | 68        | 72 [39-105]                     | -5.2  |
| Other magnesium preparations           | 73        | 80 [22-139]                     | -8.9  |
| Magnesium lactate                      | 65        | 51 [30-71]                      | 27.9  |
| Other mineral formulation preparations | 15        | 5 [-2-12]                       | 201.3 |
| Sodium dihydrogen phosphate dihydrate  | 8         | 5 [-12-22]                      | 69.7  |
| Calcium chloride                       | 1         | 1 [-1-2]                        | 75.2  |
| Monobasic potassium phosphate          | 8         | 7 [-4-17]                       | 17.1  |
| Other chromium preparations            | 1         | 1 [-3-5]                        | 19.8  |
| 906 Vitamins                           | 2,691,293 | 2,604,367[2,391,962-2,816,771]  | 3.3   |
| Colecalciferol                         | 2,077,474 | 2,022,227 [1,851,551-2,192,904] | 2.7   |
| Thiamine hydrochloride                 | 261,835   | 250,683 [233,140-268,227]       | 4.4   |
| Vitamin B compound                     | 141,804   | 140,957 [124,469-157,444]       | 0.6   |
| Other multivitamin preparations        | 78,272    | 75,563 [65,096-86,029]          | 3.6   |
| Alfacalcidol                           | 66,796    | 64,794 [59,809-69,779]          | 3.1   |
| Vitamins caps                          | 28,470    | 26,403 [21,307-31,499]          | 7.8   |
| Pyridoxine hydrochloride               | 8,794     | 8,396 [7,652-9,140]             | 4.7   |
| Ascorbic acid                          | 7,178     | 6,387 [4,531-8,243]             | 12.4  |
| Ergocalciferol                         | 6,618     | 5,377 [2,396-8,357]             | 23.1  |
| Calcitriol                             | 5,214     | 5,044 [4,370-5,719]             | 3.4   |
| Vitamin A                              | 2,908     | 2,806 [2,187-3,426]             | 3.6   |
| Vitamin E                              | 2,656     | 2,113 [1,535-2,692]             | 25.7  |

|                                           |        |                        |       |
|-------------------------------------------|--------|------------------------|-------|
| Phytomenadione                            | 1,153  | 1,002 [725-1,279]      | 15.1  |
| Tocopheryl acetate                        | 751    | 647 [493-802]          | 16    |
| Riboflavin                                | 834    | 781 [671-892]          | 6.7   |
| Menadiol sodium phosphate                 | 732    | 777 [96-1,458]         | -5.8  |
| Cod liver oil                             | 701    | 436 [81-790]           | 61    |
| Nicotinamide                              | 569    | 487 [383-592]          | 16.8  |
| Other vitamin B preparations              | 187    | 162 [109-215]          | 15.3  |
| Other vitamin A preparations 0906011      | 34     | 48 [9-87]              | -28.6 |
| Paricalcitol                              | 59     | 61 [21-102]            | -4    |
| Vitamin B and C injection                 | 25     | 79 [11-147]            | -68.3 |
| Other vitamin B compound preparations     | 26     | 151 [-17-319]          | -82.8 |
| Betacarotene                              | 9      | 3 [-5-10]              | 218.2 |
| Tocofersolan                              | 4      | 1 [-18-20]             | 273.8 |
| Other pantothenic acid preparations       | 1      | 1 [-3-6]               | -26.9 |
| 908 Metabolic disorders                   | 445    | 402[282-523]           | 10.6  |
| Levocarnitine                             | 259    | 260 [180-340]          | -0.2  |
| Sodium benzoate                           | 88     | 60 [23-97]             | 46.5  |
| Zinc acetate                              | 43     | 46 [11-81]             | -6.3  |
| Mercaptamine                              | 32     | 39 [7-70]              | -17.5 |
| Betaine anhydrous                         | 26     | 13 [-5-32]             | 96    |
| Sodium phenylbutyrate                     | 4      | 2 [-13-17]             | 96.4  |
| Trientine dihydrochloride                 | 6      | 7 [-31-46]             | -18.5 |
| Cholesterol                               | 7      | 4 [-1-9]               | 82.6  |
| Sucrase                                   | 2      | 4 [-4-13]              | -53.5 |
| 909 Foods                                 | 19,195 | 20,284[18,131-22,437]  | -5.4  |
|                                           | 19,195 | 20,284 [18,131-22,437] | -5.4  |
| 910 Compound vitamin/mineral formulations | 11,043 | 16,104[11,611-20,598]  | -31.4 |
|                                           | 11,043 | 16,104 [11,611-20,598] | -31.4 |

|                                                     |           |                                |       |
|-----------------------------------------------------|-----------|--------------------------------|-------|
| 911 Health supplements                              | 4,604     | 3,896[2,734-5,058]             | 18.2  |
| Other amino acid and nutritional agent preparations | 1,812     | 1,833 [1,618-2,049]            | -1.2  |
| Other enzyme preparations 0911020                   | 1,535     | 1,499 [669-2,329]              | 2.4   |
| Other digestive aid preparations                    | 1,122     | 1,179 [407-1,952]              | -4.8  |
| Taurine                                             | 135       | 122 [67-177]                   | 11    |
| 912 Other health supplements                        | 11,707    | 48,732[25,951-71,514]          | -76   |
|                                                     | 11,707    | 48,732 [25,951-71,514]         | -76   |
| 1001 Drugs used in rheumatic diseases and gout      | 1,664,744 | 1,784,837[1,609,056-1,960,619] | -6.7  |
| Naproxen                                            | 496,373   | 576,808 [491,636-661,980]      | -13.9 |
| Allopurinol                                         | 522,423   | 511,449 [475,741-547,156]      | 2.1   |
| Ibuprofen                                           | 364,981   | 416,853 [347,631-486,076]      | -12.4 |
| Methotrexate                                        | 177,936   | 169,132 [155,966-182,298]      | 5.2   |
| Hydroxychloroquine sulfate                          | 106,314   | 93,524 [84,590-102,458]        | 13.7  |
| Diclofenac sodium                                   | 45,873    | 194,047 [129,386-258,707]      | -76.4 |
| Colchicine                                          | 44,732    | 42,958 [38,531-47,386]         | 4.1   |
| Meloxicam                                           | 36,691    | 36,906 [28,485-45,326]         | -0.6  |
| Etoricoxib                                          | 32,865    | 33,787 [30,520-37,055]         | -2.7  |
| Piroxicam                                           | 30,150    | 30,597 [19,116-42,078]         | -1.5  |
| Methylprednisolone acetate                          | 10,356    | 48,460 [42,015-54,905]         | -78.6 |
| Celecoxib                                           | 25,945    | 25,588 [22,796-28,380]         | 1.4   |
| Mefenamic acid                                      | 16,663    | 14,444 [6,395-22,492]          | 15.4  |
| Triamcinolone acetonide                             | 10,631    | 25,173 [21,793-28,552]         | -57.8 |
| Leflunomide                                         | 15,816    | 14,862 [13,601-16,123]         | 6.4   |
| Febuxostat                                          | 14,270    | 15,070 [13,599-16,541]         | -5.3  |
| Indometacin                                         | 9,468     | 8,941 [7,212-10,671]           | 5.9   |
| Etodolac                                            | 7,659     | 7,733 [6,283-9,183]            | -1    |
| Nabumetone                                          | 1,900     | 2,473 [2,081-2,866]            | -23.2 |
| Diclofenac potassium                                | 1,064     | 954 [219-1,688]                | 11.6  |



|                                            |         |                          |        |
|--------------------------------------------|---------|--------------------------|--------|
| Penicillamine                              | 660     | 660 [531-790]            | 0      |
| Aceclofenac                                | 444     | 510 [333-687]            | -13    |
| Triamcinolone hexacetonide                 | 35      | 441 [309-574]            | -92.1  |
| Ibuprofen lysine                           | 158     | 144 [68-221]             | 9.4    |
| Flurbiprofen                               | 156     | 99 [-65-262]             | 57.7   |
| Sulindac                                   | 117     | 151 [109-194]            | -22.7  |
| Dexketoprofen                              | 86      | 72 [36-107]              | 20     |
| Tiaprofenic acid                           | 100     | 91 [55-126]              | 10.3   |
| Probenecid                                 | 68      | 51 [6-97]                | 32.1   |
| Tenoxicam                                  | 45      | 8 [-59-74]               | 485.1  |
| Benzbromarone                              | 14      | 14 [-10-39]              | -2.9   |
| Glucosamine hydrochloride (Rheumatic)      | 17      | -50 [-283-183]           | -133.9 |
| Sodium aurothiomalate                      | 8       | 118 [23-213]             | -93.2  |
| Apremilast                                 | 10      | 14 [4-24]                | -30.1  |
| Baricitinib                                | 14      | 11 [4-17]                | 33.1   |
| Phenylbutazone                             | 16      | 12 [0-25]                | 30.3   |
| Sulfinpyrazone                             | 7       | -72 [-398-254]           | -109.7 |
| Adalimumab                                 | 10      | 6 [-27-38]               | 81     |
| Ibuprofen sodium dihydrate                 | 4       | 1 [-13-15]               | 287.1  |
| Tiopronin                                  | 6       | 1 [-8-11]                | 325.3  |
| Etanercept                                 | 11      | 0 [-39-38]               | -2476  |
| Dexibuprofen                               | 2       | -20 [-119-80]            | -110.2 |
| Glucosamine sulfate (Rheumatic)            | 2       | 2 [-2-6]                 | -2.7   |
| Abatacept                                  | 1       | 1 [-7-9]                 | 14.6   |
| 1002 Drugs used in neuromuscular disorders | 132,681 | 127,078[117,472-136,684] | 4.4    |
| Baclofen                                   | 101,242 | 97,598 [90,625-104,571]  | 3.7    |
| Methocarbamol                              | 12,612  | 12,904 [11,034-14,774]   | -2.3   |
| Tizanidine hydrochloride                   | 9,150   | 8,497 [7,725-9,268]      | 7.7    |

|                                                    |         |                          |        |
|----------------------------------------------------|---------|--------------------------|--------|
| Pyridostigmine bromide                             | 6,124   | 5,754 [5,314-6,194]      | 6.4    |
| Dantrolene sodium                                  | 3,338   | 3,255 [2,910-3,601]      | 2.5    |
| Dronabinolcannabidiol                              | 136     | 109 [77-142]             | 24.5   |
| Neostigmine bromide                                | 76      | 81 [45-116]              | -5.9   |
| Other neuromuscularar transmisson preparations     | 1       | -1 [-9-6]                | -187.9 |
| Fampridine                                         | 1       | 0 [-3-3]                 | 4568.3 |
| 1003 Soft-tissue disorders and topical pain relief | 508,493 | 566,362[503,520-629,204] | -10.2  |
| Diclofenac diethyl                                 | 151,632 | 85,764 [5,376-166,151]   | 76.8   |
| Benzydamine hydrochloride                          | 31,561  | 46,066 [31,788-60,343]   | -31.5  |
| Piroxicam                                          | 30,150  | 30,597 [19,116-42,078]   | -1.5   |
| Heparinoid                                         | 23,853  | 25,899 [19,654-32,144]   | -7.9   |
| Diethylamine salicylate                            | 14,549  | 15,089 [9,210-20,969]    | -3.6   |
| Capsaicin                                          | 14,682  | -11,872 [-29,849-6,104]  | -223.7 |
| Ketoprofen                                         | 13,084  | 12,786 [10,314-15,257]   | 2.3    |
| Methyl salicylate                                  | 1,904   | 2,842 [1,157-4,528]      | -33    |
| Felbinac                                           | 211     | -457 [-7,297-6,382]      | -146.2 |
| Nicotinates                                        | 149     | -407 [-6,276-5,462]      | -136.6 |
| Freeze sprays and gels                             | 52      | -137 [-1,116-842]        | -138   |
| Arnica montana                                     | 21      | 34 [-4-71]               | -37.8  |
| Methyl salicylatelevomenthol                       | 13      | 17 [2-31]                | -21.2  |
| Hyaluronidase                                      | 1       | -1 [-9-6]                | -184   |
| 1103 Anti-infective eye preparations               | 88,750  | 118,242[95,106-141,378]  | -24.9  |
| Chloramphenicol                                    | 70,387  | 97,040 [77,962-116,118]  | -27.5  |
| Fusidic acid                                       | 66,339  | 90,582 [77,136-104,027]  | -26.8  |
| Gentamicin sulfate                                 | 2,700   | 1,508 [-1,842-4,858]     | 79.1   |
| Ganciclovir                                        | 1,201   | 1,429 [431-2,427]        | -16    |
| Hydrocort sodiumphos                               | 693     | 664 [542-786]            | 4.3    |
| Propamidine isetionate                             | 36      | 37 [-1-75]               | -2.6   |

|                                                                   |         |                           |        |
|-------------------------------------------------------------------|---------|---------------------------|--------|
| Dibrompropamide isetionate                                        | 37      | 19 [-12-50]               | 92.7   |
| Cefuroxime sodium                                                 | 22      | 11 [-4-25]                | 107.2  |
| Polihexanide                                                      | 5       | 3 [-3-10]                 | 43.1   |
| 1104 Corticosteroids and other anti-inflammatory eye preparations | 182,679 | 183,941[132,408-235,475]  | -0.7   |
| Dexamethasone                                                     | 138,060 | 164,858 [139,576-190,141] | -16.3  |
| Sodium cromoglicate                                               | 86,474  | 84,684 [45,777-123,590]   | 2.1    |
| Olopatadine                                                       | 17,808  | 16,200 [13,421-18,979]    | 9.9    |
| Prednisolone acetate                                              | 7,286   | 6,891 [4,448-9,335]       | 5.7    |
| Azelastrone hydrochloride                                         | 10,674  | 8,710 [6,174-11,246]      | 22.6   |
| Fluorometholone                                                   | 5,814   | 5,110 [3,727-6,493]       | 13.8   |
| Prednisolone sodium phosphate                                     | 6,290   | 6,215 [4,754-7,676]       | 1.2    |
| Ciclosporin (Eye Anti Inflammatory)                               | 5,380   | 5,386 [4,818-5,954]       | -0.1   |
| Lodoxamide trometamol                                             | 1,904   | 1,717 [1,117-2,318]       | 10.9   |
| Ketotifen fumarate                                                | 1,715   | 1,810 [1,337-2,283]       | -5.3   |
| Loteprednol etabonate                                             | 1,128   | 789 [-763-2,342]          | 42.9   |
| Antazoline                                                        | 1,310   | 1,118 [486-1,751]         | 17.1   |
| Nedocromil sodium                                                 | 400     | -1,692 [-10,704-7,320]    | -123.6 |
| Hamamalis                                                         | 179     | 152 [95-209]              | 17.7   |
| Epinastine hydrochloride                                          | 210     | 177 [94-261]              | 18.3   |
| Naphazoline hydrochloride                                         | 96      | 93 [62-124]               | 3.2    |
| Flurbiprofen sodium                                               | 10      | 16 [4-29]                 | -39    |
| Emedastine                                                        | 1       | -113 [-401-174]           | -100.9 |
| 1105 Mydriatics and cytoplegics                                   | 6,476   | 5,754[5,134-6,374]        | 12.5   |
| Atropine sulfate                                                  | 4,648   | 4,380 [3,802-4,958]       | 6.1    |
| Cyclopentolate hydrochloride                                      | 1,711   | 1,406 [1,187-1,625]       | 21.7   |
| Tropicamide                                                       | 140     | 103 [54-151]              | 36.5   |
| Phenylephrine hydrochloride                                       | 13      | 28 [-8-65]                | -54.3  |
| 1106 Treatment of glaucoma                                        | 813,201 | 782,995[727,146-838,845]  | 3.9    |

|                                            |         |                           |       |
|--------------------------------------------|---------|---------------------------|-------|
| Latanoprost                                | 237,137 | 228,295 [212,673-243,916] | 3.9   |
| Bimatoprost                                | 96,439  | 93,010 [84,001-102,018]   | 3.7   |
| Timolol and bimatoprost                    | 84,135  | 83,164 [76,179-90,148]    | 1.2   |
| Brinzolamide                               | 84,977  | 81,998 [74,052-89,944]    | 3.6   |
| Dorzolamide and timolol                    | 63,858  | 61,233 [56,380-66,087]    | 4.3   |
| Timolol                                    | 49,774  | 44,845 [38,528-51,162]    | 11    |
| Travoprost                                 | 32,971  | 30,626 [26,959-34,294]    | 7.7   |
| Dorzolamide                                | 30,854  | 30,037 [27,958-32,117]    | 2.7   |
| Latanoprost and timolol                    | 27,851  | 25,280 [23,079-27,482]    | 10.2  |
| Brimonidine tartrate                       | 24,056  | 23,588 [21,191-25,985]    | 2     |
| Timolol and travoprost                     | 18,649  | 18,054 [16,307-19,801]    | 3.3   |
| Brinzolamide and timolol                   | 17,341  | 18,675 [13,616-23,735]    | -7.1  |
| Brinzolamidebrimonidine                    | 16,441  | 16,311 [14,027-18,594]    | 0.8   |
| Acetazolamide                              | 8,536   | 7,688 [6,993-8,383]       | 11    |
| Tafluprost                                 | 7,042   | 6,605 [5,712-7,498]       | 6.6   |
| Timolol and brimonidine                    | 4,859   | 4,519 [3,852-5,185]       | 7.5   |
| Pilocarpine hydrochloride                  | 4,803   | 4,491 [3,979-5,003]       | 6.9   |
| Tafluprost and timolol                     | 2,480   | 2,747 [2,380-3,114]       | -9.7  |
| Betaxolol                                  | 1,848   | 1,724 [1,193-2,255]       | 7.2   |
| Levobunolol hydrochloride                  | 1,224   | 1,598 [845-2,352]         | -23.4 |
| Pilocarpine nitrate                        | 634     | 540 [345-735]             | 17.3  |
| 1107 Local anaesthetics (eye)              | 41      | 46[-34-127]               | -11.5 |
| Oxybuprocaine hydrochloride                | 14      | 21 [-5-47]                | -34.5 |
| Tetracaine hydrochloride                   | 16      | 9 [-41-60]                | 71.4  |
| Proxymetacaine hydrochloride               | 8       | 8 [-60-77]                | -2.7  |
| 1108 Miscellaneous ophthalmic preparations | 340,702 | 317,759[255,937-379,581]  | 7.2   |
| Hypromellose                               | 153,650 | 149,901 [131,428-168,374] | 2.5   |
| Carbomer 940980                            | 114,799 | 114,643 [91,521-137,765]  | 0.1   |

|                                               |         |                           |        |
|-----------------------------------------------|---------|---------------------------|--------|
| Carmellose sodium                             | 44,872  | 42,216 [27,090-57,341]    | 6.3    |
| Liquid paraffin                               | 7,076   | 5,337 [-45,857-56,531]    | 32.6   |
| Acetylcysteine                                | 7,356   | 6,737 [5,483-7,991]       | 9.2    |
| Ketorolac trometamol                          | 3,269   | 3,935 [3,097-4,774]       | -16.9  |
| Other eye tearlubricantstringent preparations | 2,891   | 3,306 [2,015-4,597]       | -12.6  |
| Apraclonidine                                 | 3,258   | 2,911 [2,410-3,412]       | 11.9   |
| Paraffin soft yellow                          | 2,704   | 1,711 [-2,756-6,178]      | 58.1   |
| Carbomer 974P                                 | 2,513   | 2,565 [1,767-3,364]       | -2     |
| Hyetellose                                    | 2,167   | 2,073 [1,795-2,352]       | 4.5    |
| Nepafenac                                     | 1,201   | 1,691 [1,413-1,969]       | -29    |
| Carbomer                                      | 1,133   | 1,187 [903-1,471]         | -4.5   |
| Bromfenac                                     | 640     | 763 [528-999]             | -16.1  |
| Moxifloxacin hydrochloride                    | 311     | 217 [152-281]             | 43.3   |
| Fluorescein sodium                            | 37      | 88 [23-154]               | -58.1  |
| Mercaptamine hydrochloride                    | 10      | 10 [-8-27]                | 3.9    |
| Povidone iodine                               | 6       | 5 [-2-11]                 | 20.5   |
| Polyvinyl alcohol                             | 4       | -1,789 [-8,371-4,794]     | -100.2 |
| Disodium edetate                              | 2       | 1 [-4-6]                  | 141    |
| 1201 Drugs acting on the ear                  | 112,915 | 132,072[113,306-150,839]  | -14.5  |
| Docusate sodium                               | 210,113 | 202,248 [189,321-215,174] | 3.9    |
| Hydrocortisone acetate                        | 36,992  | 36,447 [15,711-57,183]    | 1.5    |
| Acetic acid                                   | 4,591   | 5,645 [3,635-7,655]       | -18.7  |
| Ciprofloxaindexameth                          | 4,283   | 5,379 [3,303-7,455]       | -20.4  |
| Dexamethasone sodium metasulphobenzoate       | 2,727   | 5,073 [-21,559-31,705]    | -46.2  |
| Flumetasone pivalate                          | 1,540   | 867 [-8,291-10,024]       | 77.7   |
| Urea hydrogen peroxide                        | 1,285   | 1,910 [1,401-2,420]       | -32.7  |
| Oils for the ear                              | 86      | -1,139 [-2,030--248]      | -107.6 |
| Ciprofloxacinfluocinolone                     | 119     | 198 [125-272]             | -40    |

|                                                         |         |                           |         |
|---------------------------------------------------------|---------|---------------------------|---------|
| Other otitis external preparations                      | 16      | 8 [1-15]                  | 92.8    |
| Aluminium acetate                                       | 2       | -2 [-12-9]                | -225.6  |
| 1202 Drugs acting on the nose                           | 684,567 | 664,670[588,124-741,216]  | 3       |
| Mometasone furoate                                      | 258,421 | 267,857 [237,830-297,884] | -3.5    |
| Fluticasone furoate                                     | 136,103 | 121,804 [100,039-143,570] | 11.7    |
| Fluticasone propionate (Nasal)                          | 78,003  | 78,770 [70,434-87,105]    | -1      |
| Neomycin sulfate                                        | 26,637  | 38,571 [29,698-47,445]    | -30.9   |
| Fluticasone propionateazelaastine hydrochloride (Nasal) | 29,434  | 30,952 [27,745-34,159]    | -4.9    |
| Sodium chloride                                         | 29,946  | 25,296 [22,759-27,833]    | 18.4    |
| Triamcinolone acetonide                                 | 10,631  | 25,173 [21,793-28,552]    | -57.8   |
| Mupirocin                                               | 9,468   | 11,312 [6,999-15,624]     | -16.3   |
| Xylometazoline hydrochloride                            | 2,123   | 2,645 [1,036-4,255]       | -19.7   |
| Other topical nasal decongestant preparations           | 12      | 15 [-6-36]                | -20.8   |
| Xylometazoline hydrochlorideipratropium bromide         | 3       | 0 [0-0]                   | Inf     |
| Oxymetazoline hydrochloride                             | 2       | 0 [-2-2]                  | -3478.6 |
| 1203 Drugs acting on the oropharynx                     | 69,600  | 81,297[61,859-100,734]    | -14.4   |
| Benzylamine hydrochloride                               | 31,561  | 46,066 [31,788-60,343]    | -31.5   |
| Chlorhexidine gluconate                                 | 28,037  | 29,074 [24,927-33,221]    | -3.6    |
| Miconazole                                              | 13,514  | 12,578 [11,028-14,129]    | 7.4     |
| Pilocarpine hydrochloride                               | 4,803   | 4,491 [3,979-5,003]       | 6.9     |
| Hydrocortisone (Sodium succinate)                       | 3,343   | 3,896 [3,158-4,634]       | -14.2   |
| Choline salicylate                                      | 1,372   | 1,151 [729-1,574]         | 19.2    |
| Other treatment of dry mouth preparations               | 722     | 685 [600-770]             | 5.4     |
| Artificial saliva                                       | 617     | -643 [-5,451-4,165]       | -195.9  |
| Benzocaine                                              | 368     | 600 [310-890]             | -38.7   |
| Flubiprofen                                             | 58      | 341 [-24-706]             | -83     |
| Dequalinium chloride                                    | 56      | 104 [19-189]              | -46.2   |
| Sodium benzoate                                         | 88      | 60 [23-97]                | 46.5    |

|                                                      |         |                           |          |
|------------------------------------------------------|---------|---------------------------|----------|
| Other mouth wash, gargle and dentifrice preparations | 60      | 49 [27-72]                | 22.1     |
| Hexetidine                                           | 70      | 272 [-744-1,288]          | -74.2    |
| Amylmetacresol                                       | 43      | 10 [-91-112]              | 322.2    |
| Cetylpyridinium chloride                             | 39      | 28 [-3-58]                | 40.2     |
| Tetracaine hydrochloride                             | 16      | 9 [-41-60]                | 71.4     |
| Diclofenac sod                                       | 3       | 4 [-25-33]                | -25      |
| Amphotericin                                         | 5       | 9 [-2-19]                 | -41.4    |
| Hexylresorcinol                                      | 8       | 3 [-24-30]                | 143.4    |
| Other oral ulceration and inflammation preparations  | 2       | 4 [-5-12]                 | -43.8    |
| Dichlorobenzyl alcoholamylmetacresol                 | 2       | 0 [-13-13]                | -52739.9 |
| Other lozenge and spray preparations                 | 3       | 4 [-1-8]                  | -19.3    |
| 1301 Management of skin conditions                   | 5,100   | 5,068[3,738-6,398]        | 0.6      |
| Cetomacrogol                                         | 5,040   | 5,125 [3,865-6,385]       | -1.7     |
| Wool fat                                             | 53      | -13 [-139-113]            | -509.2   |
| Wool fat hydrous                                     | 2       | 8 [-8-24]                 | -74.5    |
| Paraffin hard                                        | 5       | 4 [-4-11]                 | 30.1     |
| 1302 Emollient and barrier preparations              | 614,806 | 607,037[490,701-723,372]  | 1.3      |
| Other emollient preparations                         | 423,198 | 414,473 [343,182-485,765] | 2.1      |
| Emollient bath and shower preparations               | 62,950  | 59,134 [40,307-77,960]    | 6.5      |
| Light liquid paraffin                                | 40,714  | 43,689 [23,199-64,180]    | -6.8     |
| Urea                                                 | 39,338  | 38,674 [33,861-43,486]    | 1.7      |
| Dimeticone (Barrier)                                 | 11,903  | 20,183 [14,279-26,088]    | -41      |
| Emulsifying wax                                      | 7,251   | 5,733 [1,931-9,534]       | 26.5     |
| Benzalkonium chloride                                | 6,590   | 5,477 [4,149-6,805]       | 20.3     |
| Other barrier preparations                           | 3,899   | 3,964 [3,026-4,902]       | -1.6     |
| Wool alcohols                                        | 1,601   | 1,987 [-525-4,499]        | -19.4    |
| Paraffin soft white                                  | 1,016   | 669 [269-1,070]           | 51.8     |
| Dexpanthenol                                         | 782     | 817 [600-1,034]           | -4.3     |

|                                                   |         |                            |        |
|---------------------------------------------------|---------|----------------------------|--------|
| Chlohexidine gluconate (Emollient)                | 103     | -25 [-320-270]             | -507.8 |
| Zinc paste                                        | 1       | -76 [-475-322]             | -101.3 |
| Lactic acid                                       | 2       | 1 [-3-4]                   | 145.8  |
| 1303 Topical local anaesthetics and antipruritics | 21,593  | 22,747[19,133-26,361]      | -5.1   |
| Menthol                                           | 9,851   | 9,963 [9,049-10,876]       | -1.1   |
| Crotamiton                                        | 7,936   | 7,635 [4,310-10,960]       | 3.9    |
| Calamine                                          | 2,391   | 3,893 [1,524-6,262]        | -38.6  |
| Doxepin hydrochloride                             | 253     | -41 [-229-147]             | -721.2 |
| Mepyramine maleate                                | 89      | 20 [-167-208]              | 335.6  |
| 1304 Topical corticosteroids                      | 843,393 | 926,699[821,663-1,031,735] | -9     |
| Betamethasone valerate                            | 243,376 | 254,782 [224,752-284,813]  | -4.5   |
| Clobetasone butyrate                              | 102,902 | 95,813 [34,035-157,591]    | 7.4    |
| Clobetasol propionate                             | 69,005  | 72,482 [66,063-78,901]     | -4.8   |
| Betamethasone esters                              | 28,190  | 30,972 [26,754-35,190]     | -9     |
| Fluocinolone acetonide                            | 7,371   | 11,089 [4,075-18,102]      | -33.5  |
| Fludrocortide                                     | 3,441   | 3,248 [-281-6,776]         | 6      |
| Hydrocortisone butyrate                           | 2,994   | 3,838 [1,826-5,851]        | -22    |
| Fluocinonide                                      | 858     | 865 [532-1,199]            | -0.9   |
| Diflucortolone valerate                           | 724     | 1,420 [754-2,085]          | -49    |
| Fluticasone propionate (Topical)                  | 610     | 624 [62-1,185]             | -2.2   |
| Other topical corticosteroid preparations         | 25      | 36 [14-59]                 | -31.4  |
| Alclometasone dipropionate                        | 3       | 998 [-4,796-6,792]         | -99.7  |
| 1305 Preparations fo reczema and psoriasis        | 127,863 | 131,327[120,667-141,986]   | -2.6   |
| Calcipotriol                                      | 93,070  | 94,616 [87,235-101,997]    | -1.6   |
| Cocois                                            | 6,944   | 7,398 [6,600-8,197]        | -6.1   |
| Tars                                              | 4,707   | 4,293 [3,513-5,074]        | 9.6    |
| Pimecrolimus                                      | 3,634   | 4,336 [3,383-5,290]        | -16.2  |
| Acitretin                                         | 876     | 880 [743-1,016]            | -0.4   |



|                                                 |         |                          |        |
|-------------------------------------------------|---------|--------------------------|--------|
| Gamolenic acid                                  | 773     | 683 [483-883]            | 13.2   |
| Tacalcitol                                      | 509     | 525 [99-951]             | -3     |
| Dithranol                                       | 442     | 372 [247-497]            | 18.9   |
| Other psoriasis preparations                    | 157     | 297 [218-376]            | -47.2  |
| Other eczema preparations                       | 41      | 33 [-36-103]             | 22.9   |
| Alitretinoin                                    | 18      | 16 [0-32]                | 12.4   |
| Tazarotene                                      | 19      | -17 [-131-97]            | -211.7 |
| Ustekinumab (Psoriasis)                         | 2       | 2 [0-5]                  | -3     |
| Ichthammol                                      | 5       | 1 [-9-11]                | 522.1  |
| Methoxsalen                                     | 4       | 3 [-2-8]                 | 47.2   |
| 1306 Acne and rosacea                           | 117,018 | 144,430[126,772-162,089] | -19    |
| Erythromycin                                    | 45,191  | 50,625 [29,768-71,482]   | -10.7  |
| Benzoyl peroxide and clindamycin phosphate      | 38,159  | 46,407 [32,656-60,158]   | -17.8  |
| Adapalene and benzoyl peroxide                  | 14,291  | 18,308 [15,734-20,881]   | -21.9  |
| Adapalene                                       | 11,971  | 14,826 [12,843-16,809]   | -19.3  |
| Clindamycin phosphate                           | 8,623   | 9,839 [7,234-12,443]     | -12.4  |
| Benzoyl peroxide                                | 8,149   | 10,823 [8,930-12,715]    | -24.7  |
| Co-cyprindiol (Cyprote acetateethinylestradiol) | 6,422   | 6,889 [5,175-8,603]      | -6.8   |
| Azelaic acid                                    | 6,424   | 7,945 [6,732-9,158]      | -19.1  |
| Ivermectin                                      | 4,734   | 6,135 [5,431-6,840]      | -22.8  |
| Isotretinoin                                    | 2,792   | 4,608 [2,826-6,390]      | -39.4  |
| Clindamycintretinoin                            | 2,128   | 2,502 [1,678-3,326]      | -14.9  |
| Brimonidine tart (Rosacea)                      | 589     | 919 [620-1,218]          | -35.9  |
| Nicotinamide                                    | 569     | 487 [383-592]            | 16.8   |
| Tretinoin                                       | 14      | 12 [-3-27]               | 17.6   |
| Sulfur                                          | 6       | 10 [0-21]                | -42.4  |
| 1307 Preparations for warts and calluses        | 6,621   | 11,003[6,554-15,451]     | -39.8  |
| Salicylic acid                                  | 3,868   | 7,846 [3,732-11,961]     | -50.7  |

|                                                                   |         |                          |       |
|-------------------------------------------------------------------|---------|--------------------------|-------|
| Imiquimod                                                         | 1,869   | 2,098 [1,765-2,431]      | -10.9 |
| Silver nitrate                                                    | 485     | 746 [564-928]            | -35   |
| Podophyllotoxin                                                   | 552     | 461 [294-627]            | 19.8  |
| Glutaraldehyde                                                    | 53      | 126 [40-212]             | -58.1 |
| Formaldehyde                                                      | 15      | 17 [-13-47]              | -13.7 |
| Camellia sinensis extract                                         | 11      | 8 [3-12]                 | 39.4  |
| 1308 Sunscreens and camouflagers                                  | 22,197  | 35,154[28,973-41,334]    | -36.9 |
| Fluorouracil (Sunscreen)                                          | 7,661   | 13,924 [12,369-15,479]   | -45   |
| Other suncreening preparations                                    | 5,530   | 5,708 [1,508-9,908]      | -3.1  |
| Other camouflage preparations                                     | 2,794   | 3,213 [2,685-3,742]      | -13.1 |
| Ingenol mebutate                                                  | 33      | 2,203 [1,358-3,047]      | -98.5 |
| Titanium dioxide                                                  | 17      | 17 [-35-69]              | 0     |
| 1309 Shampoo and other preparations for scalp and hair conditions | 98,042  | 105,101[92,172-118,029]  | -6.7  |
| Ketoconazole                                                      | 47,637  | 58,009 [51,399-64,620]   | -17.9 |
| Coal tar                                                          | 45,657  | 45,124 [40,103-50,145]   | 1.2   |
| Benzalkonium chloride                                             | 6,590   | 5,477 [4,149-6,805]      | 20.3  |
| Selenium sulfide                                                  | 2,362   | 1,814 [-859-4,487]       | 30.2  |
| Eflornithine monohydrate chloride                                 | 1,921   | 1,997 [1,257-2,737]      | -3.8  |
| Alkyl sulfate                                                     | 128     | 249 [-45-543]            | -48.6 |
| Other shampoo and scalp preparations                              | 6       | 4 [-4-12]                | 52.8  |
| 1310 Anti-infective skin preparations                             | 210,078 | 266,646[232,492-300,800] | -21.2 |
| Miconazole nitrate                                                | 26,472  | 34,357 [28,803-39,912]   | -23   |
| Mupirocin                                                         | 9,468   | 11,312 [6,999-15,624]    | -16.3 |
| Amorolfine hydrochloride                                          | 10,191  | 11,612 [8,562-14,661]    | -12.2 |
| Permethrin                                                        | 8,218   | 11,344 [7,932-14,756]    | -27.6 |
| Sodium fusidate                                                   | 2,150   | 2,502 [1,768-3,236]      | -14.1 |
| Silver sulfadiazine                                               | 2,613   | 1,476 [478-2,474]        | 77.1  |
| Malathion                                                         | 1,146   | 637 [-1,317-2,592]       | 79.8  |

|                                                   |        |                        |        |
|---------------------------------------------------|--------|------------------------|--------|
| Tioconazole                                       | 1,057  | 983 [384-1,583]        | 7.5    |
| Hydrogen peroxide                                 | 779    | 733 [551-915]          | 6.3    |
| Cetrimide                                         | 449    | 297 [-320-915]         | 50.9   |
| Magnesium sulfate                                 | 438    | 393 [238-547]          | 11.6   |
| Dimeticone (Parasitocidal)                        | 443    | -385 [-1,220-451]      | -215.2 |
| Undecenoates                                      | 159    | 175 [87-264]           | -9.3   |
| Penciclovir                                       | 80     | 76 [13-140]            | 4.6    |
| Dibrompropamide isetionate                        | 37     | 19 [-12-50]            | 92.7   |
| Bifonazole                                        | 8      | 16 [0-31]              | -49.6  |
| Tolnaftate                                        | 11     | 12 [-16-40]            | -10.7  |
| Other antiviral preparations                      | 10     | 16 [2-31]              | -39.3  |
| Polymyxins                                        | 2      | -86 [-891-720]         | -102.3 |
| Chlorhex hydrochloride                            | 10     | 6 [-4-15]              | 76.2   |
| Benzyl benzoate                                   | 1      | 2 [-7-12]              | -54.2  |
| Other minor cut and abrasion preparations         | 1      | 13 [-7-34]             | -92.5  |
| Benzoic acid                                      | 2      | 1 [-13-14]             | 192.1  |
| 1311 Skin cleansers, antiseptics, and desloughing | 15,182 | 17,654[15,514-19,795]  | -14    |
| Chlorhexidine gluconate                           | 28,037 | 29,074 [24,927-33,221] | -3.6   |
| Alkyl sulphate                                    | 1,739  | 2,018 [1,685-2,352]    | -13.8  |
| Potassium permanganate                            | 734    | 743 [556-930]          | -1.2   |
| Iodine compounds                                  | 386    | -8 [-530-514]          | -5066  |
| Alcohol                                           | 127    | 98 [42-154]            | 29.3   |
| Chlorhexidine acetate                             | 92     | 77 [-88-242]           | 19.8   |
| Sodium hypochlorite                               | 53     | 45 [24-67]             | 17.3   |
| Ster larvae                                       | 55     | 61 [21-101]            | -9.5   |
| Chloroxylenol                                     | 30     | 36 [0-72]              | -17.1  |
| Halogenated phenols with phenol                   | 18     | 5 [-18-28]             | 276.5  |
| Isopropyl alcohol                                 | 7      | 2 [-14-17]             | 274.8  |

|                                          |         |                           |        |
|------------------------------------------|---------|---------------------------|--------|
| Triclosan                                | 14      | -47 [-134-41]             | -130.1 |
| Other alcohol and saline preparations    | 3       | 5 [0-11]                  | -44    |
| 1312 Antiperspirants                     | 2,760   | 3,676[2,327-5,024]        | -24.9  |
| Aluminium chloride                       | 2,731   | 3,676 [2,344-5,008]       | -25.7  |
| Other antiperspirant preparations        | 6       | -1 [-15-13]               | -913.6 |
| 1313 Wound management products           | 1,472   | 1,312[975-1,650]          | 12.2   |
|                                          | 1,470   | 1,312 [975-1,650]         | 12     |
| 1314 Topical circulatory preparations    | 6,013   | 7,203[6,246-8,160]        | -16.5  |
|                                          | 2       | 6 [1-11]                  | -67.5  |
| 1315 Miscellaneous topical preparations  | 135     | 107[25-189]               | 26     |
| Other miscellaneous topical preparations | 85      | 76 [15-136]               | 12.5   |
| Depigmenting agents                      | 50      | 65 [31-99]                | -22.8  |
| 1404 Vaccines and antisera               | 158,337 | 177,039[-612,249-966,328] | -10.6  |
| Influenza                                | 95,417  | 13,451 [-755,921-782,822] | 609.4  |
| Pneumococcal                             | 22,586  | 35,441 [385-70,497]       | -36.3  |
| Typhoid                                  | 10,401  | 39,464 [20,751-58,177]    | -73.6  |
| Diphtheria                               | 13,060  | 35,789 [27,560-44,018]    | -63.5  |
| Hepatitis A                              | 7,634   | 32,910 [9,414-56,407]     | -76.8  |
| Hepatitis Atyphoid vaccine               | 2,866   | 16,845 [-2,803-36,493]    | -83    |
| Hepatitis B                              | 4,090   | 6,553 [754-12,353]        | -37.6  |
| Hepatitis Ahepatitis B                   | 1,433   | 6,158 [-1,301-13,617]     | -76.7  |
| Meningococcal A + C + W135 + Y vaccine   | 327     | 176 [-9,834-10,187]       | 85.3   |
| Measles, mumps and rubella vaccine       | 110     | 600 [464-736]             | -81.7  |
| Shingles (HZ)                            | 192     | 401 [-630-1,432]          | -52.1  |
| Cholera                                  | 47      | 533 [247-818]             | -91.2  |
| Meningococcal B vaccine                  | 39      | 1,076 [-5,991-8,143]      | -96.4  |
| Haemophilus influenzae Bmeningococcal C  | 29      | 54 [-12-120]              | -46.7  |
| Varicella vaccine live                   | 51      | 126 [38-215]              | -59.6  |

|                                                      |        |                          |        |
|------------------------------------------------------|--------|--------------------------|--------|
| Human papillomavirus (Type 6,11,16,18)               | 25     | 56 [17-95]               | -55.1  |
| Rabies                                               | 17     | 7 [-88-101]              | 154    |
| Humpapvirus(Type 6,11,16,18,31,33,45,52,58)          | 3      | 21 [14-29]               | -85.9  |
| Yellow fever                                         | 7      | 20 [1-38]                | -64.2  |
| Rotavirus                                            | 2      | 0 [-32-31]               | -582.3 |
| Human papillomavirus (Type 16,18)                    | 1      | 1 [-9-11]                | 29.6   |
| 1501 General anaesthesia                             | 57,205 | 27,732[23,349-32,116]    | 106.3  |
| Midazolam hydrochloride                              | 45,033 | 25,303 [21,198-29,408]   | 78     |
| Hyoscine hydrobromide                                | 10,904 | 8,897 [4,828-12,966]     | 22.6   |
| Alfentanil hydrochloride                             | 429    | 389 [283-495]            | 10.3   |
| Fentanyl citrate                                     | 73     | 33 [-9-76]               | 118    |
| Ketamine                                             | 32     | 40 [17-63]               | -20.7  |
| Parecoxib sodium                                     | 5      | 5 [-3-13]                | 1.3    |
| Nitrous oxide                                        | 4      | 4 [-72-80]               | -4.2   |
| 1502 Local anaesthesia                               | 50,077 | 110,722[98,072-123,372]  | -54.8  |
| Lidocaine hydrochloride                              | 46,988 | 105,144 [93,053-117,235] | -55.3  |
| Lidocaine                                            | 4,704  | 4,780 [4,044-5,516]      | -1.6   |
| Tetracaine                                           | 597    | 1,401 [414-2,388]        | -57.4  |
| Bupivacaine hydrochloride                            | 215    | 1,603 [1,192-2,015]      | -86.6  |
| Mepivacaine hydrochloride                            | 48     | 234 [62-406]             | -79.5  |
| Prilocaine hydrochloride                             | 1      | 19 [-13-51]              | -94.7  |
| Cocaine                                              | 4      | 2 [-5-10]                | 81.4   |
| Levobupivacaine hydrochloride                        | 1      | 2 [-31-35]               | -57.3  |
| 1901 Alcohol, wines, and spirits                     | 0      | 0[-3-3]                  | -100   |
| 1902 Selective preparations                          | 40,999 | 32,530[12,386-52,674]    | 26     |
| Other toiletry preparations                          | 25,977 | 26,913 [18,780-35,046]   | -3.5   |
| Other individually formulated bought in preparations | 14,623 | 3,421 [-17,029-23,871]   | 327.5  |
| Charcoal                                             | 137    | 141 [87-194]             | -2.7   |

|                                                           |        |                        |       |
|-----------------------------------------------------------|--------|------------------------|-------|
| Naloxone hydrochloride                                    | 138    | 35 [-75-145]           | 291.6 |
| Other homeopathic preparations                            | 78     | 88 [-70-245]           | -11.3 |
| Other household and over the counter preparations         | 3      | 7 [2-12]               | -56.7 |
| 1904 Single substances                                    | 197    | 181[60-301]            | 9.1   |
|                                                           | 197    | 181 [60-301]           | 9.1   |
| 1905 Other preparations                                   | 995    | 1,102[701-1,502]       | -9.7  |
|                                                           | 995    | 1,102 [701-1,502]      | -9.7  |
| 1906 Acids                                                | 484    | 464[146-783]           | 4.2   |
| Other oil preparations                                    | 313    | 304 [40-569]           | 2.8   |
| Other concentrated water preparations                     | 169    | 169 [27-311]           | 0     |
| Other tincture preparations                               | 1      | 4 [-6-14]              | -74.3 |
| Other acid preparations                                   | 1      | 1 [-2-3]               | 74.8  |
| 1907 Base/Dil/Susp agents/Stabilisers                     | 49,504 | 45,901[41,459-50,343]  | 7.8   |
|                                                           | 49,504 | 45,901 [41,459-50,343] | 7.8   |
| 1909 Disinfectants, preservatives, and stabilising agents | 1      | 1[-4-6]                | -1.2  |
|                                                           | 1      | 1 [-4-6]               | -1.2  |
| 1913 Cordials/soft drinks                                 | 141    | 233[117-348]           | -39.4 |
|                                                           | 141    | 233 [117-348]          | -39.4 |
| 1914 Waters                                               | 1,014  | 876[747-1,005]         | 15.7  |
| Other purified water preparations                         | 924    | 770 [666-873]          | 20.1  |
| Sterile water                                             | 90     | 118 [46-189]           | -23.5 |
