# Supplementary material for: Analysis of primary care prescription trends in England during the COVID-19 pandemic compared against a predictive model
Source: HighWire-hosted journal article supplement (doi:10.1136/fmch-2021-001143), 2021-08-01
Supplement: fmch-2021-001143supp004_data_supplement.pdf [file fmch-2021-001143supp004_data_supplement.pdf]

**Supplementary Table 4** - Overall BNF code and drug prescribing for the month of May 2020. Absolute number of prescribed items is reported as  $N_{obs}$ , forecast number of prescribed items and 99% prediction intervals are reported as  $N_{for}$  [99%PI], and per cent difference from prediction is reported as % difference.

| Section/Drug Name                                           | $N_{obs}$ | $N_{for}$ [99CI]          | % difference |
|-------------------------------------------------------------|-----------|---------------------------|--------------|
| 101 Dyspepsia and Gastro-Oesophageal Reflux Disease         | 350,193   | 356,396[319,958-392,833]  | -1.7         |
| Alginic acid compound preparations                          | 339,402   | 342,996 [307,684-378,308] | -1           |
| Co-magaldrox (Magnesiumaluminium hydroxide)                 | 4,253     | 4,198 [3,034-5,362]       | 1.3          |
| Simeticone                                                  | 1,965     | 1,530 [884-2,175]         | 28.5         |
| Magnesium hydroxide                                         | 1,243     | 1,898 [341-3,456]         | -34.5        |
| Aluminium and magnesium and activated simeticone            | 1,118     | 1,016 [510-1,522]         | 10           |
| Magnesium oxide                                             | 355       | 353 [254-452]             | 0.6          |
| Compound alginates and proprietary indigestion preparations | 415       | 322 [221-423]             | 28.7         |
| Magnesium trisilicate                                       | 270       | 344 [-278-966]            | -21.5        |
| Aluminium and magnesium and oxetacaine                      | 239       | 251 [172-331]             | -4.9         |
| Aluminium hydroxide                                         | 31        | -231 [-593-131]           | -113.4       |
| Magnesium carbonate                                         | 34        | 39 [15-63]                | -13.1        |
| Co-simalcite (Simeticonehydrotalcite)                       | 8         | -48 [-222-126]            | -116.6       |
| Magnesium sulphate                                          | 1         | 1 [-2-3]                  | 67.8         |
| 102 Antispasmodics & Other Drugs Altering Gut Motility      | 368,912   | 408,335[375,624-441,046]  | -9.7         |
| Mebeverine hydrochloride                                    | 164,359   | 183,239 [168,769-197,710] | -10.3        |
| Hyoscine butylbromide                                       | 126,204   | 134,819 [123,390-146,248] | -6.4         |
| Glycopyrronium bromide                                      | 44,736    | 46,648 [38,107-55,188]    | -4.1         |
| Peppermint oil                                              | 40,956    | 45,703 [41,394-50,012]    | -10.4        |
| Alverine citrate                                            | 18,739    | 19,401 [17,228-21,574]    | -3.4         |
| Mebeverine hydrochloride compound preparations              | 5,525     | 5,598 [4,779-6,417]       | -1.3         |
| Propantheline bromide                                       | 3,469     | 5,800 [5,018-6,582]       | -40.2        |
| Dicycloverine hydrochloride                                 | 2,412     | 2,604 [1,566-3,642]       | -7.4         |
| Dicycloverine hydrochloride compound preparations           | 2,160     | 2,324 [1,754-2,894]       | -7.1         |

|                                                        |           |                                 |        |
|--------------------------------------------------------|-----------|---------------------------------|--------|
| Belladonna alkaloids                                   | 136       | 208 [68-348]                    | -34.6  |
| Compound antispasmodic preparations                    | 6         | -9 [-44-26]                     | -167.2 |
| Alverine citratesimeticone                             | 2         | -25 [-136-87]                   | -108.1 |
| 103 Antisecretory Drugs and Mucosal Protectants        | 5,564,685 | 6,186,409[5,708,595-6,664,223]  | -10    |
| Omeprazole                                             | 2,722,641 | 2,836,887 [2,589,234-3,084,540] | -4     |
| Lansoprazole                                           | 2,326,438 | 2,398,179 [2,236,508-2,559,850] | -3     |
| Ranitidine hydrochloride                               | 164,530   | 579,323 [539,116-619,530]       | -71.6  |
| Esomeprazole                                           | 180,625   | 188,967 [174,856-203,079]       | -4.4   |
| Pantoprazole                                           | 116,636   | 116,583 [107,671-125,494]       | 0      |
| Rabeprazole sodium                                     | 29,431    | 29,925 [27,577-32,273]          | -1.7   |
| Cimetidine                                             | 16,492    | 7,029 [3,290-10,768]            | 134.6  |
| Famotidine                                             | 4,347     | 1,593 [906-2,279]               | 173    |
| Nizatidine                                             | 1,243     | 2,035 [470-3,600]               | -38.9  |
| Sucralfate                                             | 1,359     | 1,304 [-511-3,118]              | 4.3    |
| Other test for helicobacter pylori preparations        | 337       | 668 [323-1,013]                 | -49.5  |
| Misoprostol                                            | 453       | 269 [105-433]                   | 68.5   |
| Pirenzepine                                            | 181       | 114 [52-175]                    | 59.1   |
| 104 Acute diarrhoea                                    | 129,865   | 145,036[132,660-157,411]        | -10.5  |
| Loperamide hydrochloride                               | 129,462   | 145,452 [132,976-157,928]       | -11    |
| Loperamide hydrochloride and simeticone                | 248       | 299 [235-363]                   | -17    |
| Co-phenotrope (Diphenox hydrochlorideatropine sulfate) | 122       | -748 [-2,181-685]               | -116.3 |
| Opium and morphine                                     | 33        | 84 [-63-231]                    | -60.7  |
| 105 Chronic bowel disorders                            | 205,405   | 217,784[202,719-232,848]        | -5.7   |
| Budesonide                                             | 303,261   | 307,949 [277,780-338,118]       | -1.5   |
| Mesalazine (Systemic)                                  | 122,315   | 129,365 [120,733-137,997]       | -5.4   |
| Sulfasalazine                                          | 68,206    | 71,668 [66,314-77,022]          | -4.8   |
| Prednisolone sodium phosphate                          | 4,865     | 6,321 [4,749-7,892]             | -23    |
| Balsalazide sodium                                     | 3,660     | 3,863 [3,485-4,240]             | -5.2   |

|                                         |           |                                |        |
|-----------------------------------------|-----------|--------------------------------|--------|
| Prednisolone sodium metasulphobenzoate  | 1,590     | 1,573 [1,275-1,871]            | 1.1    |
| Olsalazine sodium                       | 904       | 969 [659-1,279]                | -6.7   |
| Beclometasone dipropionate (Systemic)   | 381       | 256 [173-340]                  | 48.6   |
| 106 Laxatives                           | 1,503,402 | 1,578,680[1,460,266-1,697,094] | -4.8   |
| Macrogol 3350                           | 530,109   | 540,324 [491,039-589,610]      | -1.9   |
| Senna                                   | 326,284   | 353,869 [298,770-408,968]      | -7.8   |
| Lactulose                               | 216,442   | 215,498 [192,646-238,350]      | 0.4    |
| Docusate sodium                         | 191,151   | 213,683 [200,526-226,840]      | -10.5  |
| Ispaghula husk                          | 87,676    | 90,273 [81,230-99,316]         | -2.9   |
| Bisacodyl                               | 82,533    | 87,544 [47,530-127,559]        | -5.7   |
| Glycerol                                | 18,249    | 17,359 [15,596-19,123]         | 5.1    |
| Sodium picosulfate                      | 14,576    | 15,202 [13,736-16,669]         | -4.1   |
| Prucalopride                            | 10,955    | 12,569 [11,605-13,533]         | -12.8  |
| Sodium citrate (Rectal)                 | 7,470     | 7,128 [6,398-7,858]            | 4.8    |
| Phosphates (Rectal)                     | 5,206     | 5,464 [5,045-5,883]            | -4.7   |
| Sterculia                               | 4,176     | 4,112 [3,584-4,641]            | 1.5    |
| Linaclotide                             | 3,968     | 4,221 [2,113-6,329]            | -6     |
| Naloxegol                               | 2,758     | 3,135 [2,840-3,431]            | -12    |
| Magnesium hydroxide                     | 1,243     | 1,898 [341-3,456]              | -34.5  |
| Methylcellulose                         | 1,106     | 982 [41-1,922]                 | 12.7   |
| Bowel cleansing solutions               | 240       | 376 [195-557]                  | -36.2  |
| Co-danthramer (Dantronpoloxamer 188)    | 122       | 267 [-702-1,237]               | -54.4  |
| Arachis oil                             | 73        | 77 [38-116]                    | -5     |
| Co-danthrusate (Dantrondocusate sodium) | 27        | 188 [-748-1,125]               | -85.7  |
| Macrogol 4000                           | 13        | -1,071 [-2,697-556]            | -101.2 |
| Castor oil                              | 5         | 3 [-4-10]                      | 52.7   |
| Other osmotic laxative preparations     | 3         | 10 [6-14]                      | -70.2  |
| Other stimulant laxative preparations   | 6         | -26 [-62-9]                    | -122.8 |

|                                                  |           |                                |         |
|--------------------------------------------------|-----------|--------------------------------|---------|
| Lubiprostone                                     | 1         | -133 [-555-290]                | -100.8  |
| Phosphates                                       | 3         | 4 [-20-28]                     | -21.1   |
| Methylnaltrexone bromide                         | 2         | -1 [-12-10]                    | -368.6  |
| 107 Local Prepn for Anal & Rectal Disorders      | 97,182    | 99,616[86,907-112,326]         | -2.4    |
| Prednisolone                                     | 485,855   | 614,566 [543,975-685,157]      | -20.9   |
| Hydrocortisone                                   | 371,323   | 455,934 [401,508-510,360]      | -18.6   |
| Glyceryl trinitrate                              | 130,341   | 152,843 [137,898-167,787]      | -14.7   |
| Zinc oxide                                       | 27,011    | 25,685 [19,926-31,443]         | 5.2     |
| Fluocortolone                                    | 203       | 410 [-481-1,302]               | -50.5   |
| Hamamelis                                        | 85        | 92 [61-123]                    | -7.6    |
| Other soothing haemorrhoidal preparations        | 82        | 85 [44-127]                    | -3.7    |
| Phenol                                           | 30        | 50 [11-89]                     | -40.1   |
| 108 Stoma care                                   | 56        | 0[-265-265]                    | 41830.5 |
|                                                  | 56        | 0 [-265-265]                   | 41830.5 |
| 109 Drugs affecting intestinal secretions        | 71,962    | 84,234[77,657-90,810]          | -14.6   |
| Pancreatin                                       | 44,918    | 55,580 [50,351-60,808]         | -19.2   |
| Ursodeoxycholic acid                             | 27,042    | 28,669 [26,860-30,478]         | -5.7    |
| Other preparations for biliary disorders         | 2         | 6 [-5-17]                      | -66.4   |
| 201 Positive inotropic drugs                     | 224,827   | 239,302[218,068-260,536]       | -6      |
|                                                  | 224,827   | 239,302 [218,068-260,536]      | -6      |
| 202 Diuretics                                    | 2,498,199 | 2,669,600[2,467,942-2,871,257] | -6.4    |
| Furosemide                                       | 930,821   | 1,010,639 [935,590-1,085,688]  | -7.9    |
| Bendroflumethiazide                              | 670,535   | 699,977 [607,672-792,282]      | -4.2    |
| Indapamide                                       | 405,306   | 440,071 [403,496-476,646]      | -7.9    |
| Spironolactone                                   | 228,146   | 246,850 [229,661-264,040]      | -7.6    |
| Bumetanide                                       | 143,955   | 154,435 [143,622-165,249]      | -6.8    |
| Eplerenone                                       | 71,416    | 76,940 [72,031-81,849]         | -7.2    |
| Co-amilofruse (Amiloride hydrochloridefrusemide) | 23,460    | 23,405 [17,742-29,068]         | 0.2     |

|                                                           |           |                                 |       |
|-----------------------------------------------------------|-----------|---------------------------------|-------|
| Amiloride hydrochloride                                   | 11,183    | 12,260 [9,191-15,330]           | -8.8  |
| Co-amilozide (Amiloride hydrochloridehydrochlorothiazide) | 7,284     | 7,017 [5,047-8,987]             | 3.8   |
| Torsemide                                                 | 1,340     | 1,240 [1,034-1,447]             | 8     |
| Metolazone                                                | 1,984     | 1,450 [1,089-1,810]             | 36.9  |
| Chlortalidone                                             | 1,060     | 1,172 [961-1,383]               | -9.5  |
| Amiloride hydrochloride with loop diuretics               | 425       | 428 [268-588]                   | -0.6  |
| Xipamide                                                  | 253       | 277 [195-359]                   | -8.6  |
| Spirolactone with loop diuretics                          | 279       | 304 [231-376]                   | -8.1  |
| Triamterene with loop diuretics                           | 265       | 261 [164-358]                   | 1.4   |
| Chlorothiazide                                            | 242       | 232 [164-300]                   | 4.2   |
| Hydrochlorothiazide                                       | 137       | 110 [61-159]                    | 24.5  |
| Co-flumactone (Hydroflumethiazidespirolactone)            | 58        | 21 [-24-67]                     | 171.2 |
| Triamterene with thiazides                                | 45        | 68 [33-102]                     | -33.4 |
| Triamterene                                               | 3         | 2 [-60-64]                      | 30.6  |
| Co-triamterzide(Triamterenehydrochlorothiazide)           | 2         | 5 [-53-63]                      | -57.1 |
| 203 Anti-arrhythmic drugs                                 | 76,866    | 81,220[74,730-87,710]           | -5.4  |
| Flecainide acetate                                        | 34,751    | 37,461 [34,701-40,221]          | -7.2  |
| Amiodarone hydrochloride                                  | 37,320    | 39,014 [35,229-42,799]          | -4.3  |
| Dronedarone hydrochloride                                 | 1,657     | 1,892 [1,555-2,229]             | -12.4 |
| Propafenone hydrochloride                                 | 1,440     | 1,550 [1,377-1,722]             | -7.1  |
| Disopyramide                                              | 985       | 1,026 [782-1,270]               | -4    |
| Disopyramide phosphate                                    | 526       | 600 [481-718]                   | -12.3 |
| Mexiletine hydrochloride                                  | 179       | 175 [43-308]                    | 2.1   |
| Quinidine sulfate                                         | 8         | 13 [-3-28]                      | -36.1 |
| 204 Beta-adrenoceptor blocking drugs                      | 3,209,677 | 3,511,350[3,287,242-3,735,457]  | -8.6  |
| Bisoprolol fumarate                                       | 2,062,886 | 2,265,508 [2,108,812-2,422,204] | -8.9  |
| Atenolol                                                  | 486,979   | 516,707 [456,393-577,020]       | -5.8  |
| Propranolol hydrochloride                                 | 474,826   | 523,134 [489,464-556,805]       | -9.2  |

|                                       |           |                                 |        |
|---------------------------------------|-----------|---------------------------------|--------|
| Carvedilol                            | 47,695    | 52,335 [49,089-55,580]          | -8.9   |
| Nebivolol                             | 47,020    | 51,034 [47,660-54,407]          | -7.9   |
| Sotalol hydrochloride                 | 36,387    | 38,106 [33,599-42,614]          | -4.5   |
| Metoprolol tartrate                   | 27,814    | 23,797 [5,866-41,728]           | 16.9   |
| Co-tenidone (Atenololchlortalidone)   | 10,857    | 11,303 [8,813-13,792]           | -3.9   |
| Labetalol hydrochloride               | 8,541     | 6,314 [4,124-8,504]             | 35.3   |
| Celiprolol hydrochloride              | 2,517     | 2,706 [1,373-4,040]             | -7     |
| Nadolol                               | 1,162     | 1,232 [372-2,093]               | -5.7   |
| Atenolol with calcium channel blocker | 962       | 882 [504-1,260]                 | 9      |
| Acebutolol hydrochloride              | 704       | 715 [545-885]                   | -1.5   |
| Timolol with diuretic                 | 12        | 36 [-65-137]                    | -66.8  |
| Pindolol                              | 6         | -121 [-292-49]                  | -104.9 |
| 205 Hypertension and heart failure    | 5,887,157 | 6,376,109[5,968,633-6,783,585]  | -7.7   |
| Ramipril                              | 2,388,544 | 2,604,339 [2,439,449-2,769,228] | -8.3   |
| Losartan potassium                    | 848,431   | 930,681 [873,124-988,238]       | -8.8   |
| Lisinopril                            | 677,704   | 734,514 [680,990-788,038]       | -7.7   |
| Candesartan cilexetil                 | 579,653   | 634,618 [594,341-674,896]       | -8.7   |
| Doxazosin mesilate                    | 542,622   | 588,315 [550,020-626,611]       | -7.8   |
| Perindopril erbumine                  | 342,145   | 366,406 [338,923-393,889]       | -6.6   |
| Irbesartan                            | 142,069   | 152,414 [140,754-164,075]       | -6.8   |
| Enalapril maleate                     | 122,182   | 128,735 [116,384-141,085]       | -5.1   |
| Olmesartan medoxomil                  | 34,555    | 38,757 [33,677-43,837]          | -10.8  |
| Valsartan                             | 29,221    | 27,957 [14,733-41,180]          | 4.5    |
| Clonidine hydrochloride               | 28,406    | 36,470 [33,224-39,716]          | -22.1  |
| Moxonidine                            | 29,748    | 31,570 [28,869-34,270]          | -5.8   |
| Telmisartan                           | 26,019    | 27,118 [24,766-29,471]          | -4.1   |
| Sacubitrilvalsartan                   | 25,392    | 27,228 [25,517-28,939]          | -6.7   |
| Losartan potassium with diuretic      | 14,161    | 13,593 [10,400-16,786]          | 4.2    |

|                                                   |        |                        |         |
|---------------------------------------------------|--------|------------------------|---------|
| Hydralazine hydrochloride                         | 14,892 | 16,356 [15,296-17,415] | -8.9    |
| Lisinopril with diuretic                          | 8,047  | 6,181 [2,849-9,512]    | 30.2    |
| Irbesartan with diuretic                          | 6,138  | 5,937 [2,593-9,282]    | 3.4     |
| Methyldopa                                        | 5,360  | 6,178 [5,470-6,887]    | -13.2   |
| Trandolapril                                      | 5,288  | 5,131 [3,244-7,018]    | 3.1     |
| Captopril                                         | 5,215  | 5,130 [3,888-6,372]    | 1.7     |
| Valsartan with diuretic                           | 4,295  | 4,441 [3,372-5,510]    | -3.3    |
| Eprosartan                                        | 3,963  | 3,970 [2,707-5,233]    | -0.2    |
| Terazosin hydrochloride                           | 3,097  | 4,034 [2,758-5,310]    | -23.2   |
| Perindopril arginine with diuretic                | 3,186  | 3,152 [2,582-3,722]    | 1.1     |
| Telmisartan with diuretic                         | 2,610  | 2,702 [2,123-3,281]    | -3.4    |
| Prazosin hydrochloride                            | 2,155  | 2,568 [2,065-3,072]    | -16.1   |
| Perindopril arginine                              | 2,449  | 2,343 [1,724-2,961]    | 4.5     |
| Minoxidil                                         | 1,926  | 2,129 [1,921-2,338]    | -9.5    |
| Olmesartan medoxomilamlodipine                    | 1,469  | 1,581 [1,430-1,731]    | -7.1    |
| Aliskiren                                         | 1,332  | 1,497 [1,120-1,874]    | -11     |
| Olmesartan medoxomilhydrochlorothiazide           | 1,253  | 1,083 [822-1,345]      | 15.7    |
| Enalapril maleate with diuretic                   | 1,059  | 1,071 [814-1,328]      | -1.1    |
| Olmesartan medoxomilamlodipinehydrochlorothiazide | 814    | 942 [666-1,218]        | -13.6   |
| Imidapril hydrochloride                           | 528    | 576 [399-754]          | -8.4    |
| Ramipril with calcium channel blocker             | 488    | 558 [455-662]          | -12.6   |
| Quinapril hydrochloride                           | 521    | -52 [-6,662-6,558]     | -1105.9 |
| Fosinopril sodium                                 | 392    | 333 [-593-1,259]       | 17.8    |
| Perindopril with calcium channel blocker          | 182    | 340 [270-409]          | -46.4   |
| Sildenafil(Vasodilator Antihypertensive)          | 235    | 204 [155-253]          | 15      |
| Azilsartan medoxomil                              | 68     | 56 [40-72]             | 21.7    |
| Phenoxybenzamine hydrochloride                    | 75     | 87 [17-158]            | -14.3   |
| Quinapril hydrochloride with diuretic             | 32     | 86 [22-151]            | -63     |

|                                              |           |                                 |         |
|----------------------------------------------|-----------|---------------------------------|---------|
| Bosentan                                     | 6         | 4 [-8-16]                       | 37.4    |
| Perindopril erbumine with diuretic           | 1         | -2 [-9-5]                       | -150.3  |
| Macitentan                                   | 2         | 1 [-1-4]                        | 95.5    |
| Cilazapril                                   | 1         | -85 [-534-365]                  | -101.2  |
| Perindopril tosilate                         | 1         | 6 [-77-89]                      | -83.8   |
| Perindopril tosilateindapamide               | 1         | 0 [-41-41]                      | -3759.7 |
| 206 Nit,Calc Block & Other Antianginal Drugs | 4,193,791 | 4,520,965[4,238,453-4,803,478]  | -7.2    |
| Amlodipine                                   | 2,551,516 | 2,754,869 [2,589,798-2,919,940] | -7.4    |
| Isosorbide mononitrate                       | 366,934   | 394,391 [365,777-423,005]       | -7      |
| Felodipine                                   | 298,710   | 321,882 [295,103-348,661]       | -7.2    |
| Lercanidipine hydrochloride                  | 227,527   | 245,217 [229,578-260,856]       | -7.2    |
| Diltiazem hydrochloride                      | 204,439   | 220,440 [202,906-237,973]       | -7.3    |
| Nifedipine                                   | 109,051   | 121,784 [105,310-138,258]       | -10.5   |
| Nicorandil                                   | 106,571   | 115,761 [104,066-127,455]       | -7.9    |
| Verapamil hydrochloride                      | 51,111    | 53,979 [48,924-59,033]          | -5.3    |
| Lacidipine                                   | 46,924    | 50,742 [47,277-54,207]          | -7.5    |
| Ranolazine                                   | 44,438    | 47,327 [44,240-50,413]          | -6.1    |
| Ivabradine                                   | 40,804    | 44,988 [41,899-48,077]          | -9.3    |
| Naftidrofuryl oxalate                        | 10,041    | 10,778 [8,729-12,828]           | -6.8    |
| Isosorbide dinitrate                         | 5,489     | 5,765 [4,831-6,700]             | -4.8    |
| Valsartanamlodipine                          | 1,875     | 2,092 [1,860-2,323]             | -10.4   |
| Cilostazol                                   | 1,570     | 1,723 [1,411-2,035]             | -8.9    |
| Pentoxifylline                               | 1,492     | 1,670 [1,232-2,109]             | -10.7   |
| Nicardipine hydrochloride                    | 1,167     | 1,027 [569-1,485]               | 13.7    |
| Rutosides                                    | 796       | 784 [444-1,123]                 | 1.6     |
| Moxisylyte hydrochloride                     | 90        | 112 [62-163]                    | -19.8   |
| Trimetazidine hydrochloride                  | 110       | 51 [23-79]                      | 115.8   |
| Nimodipine                                   | 47        | 50 [21-79]                      | -5.9    |

|                                  |           |                                 |        |
|----------------------------------|-----------|---------------------------------|--------|
| Acetyl-L-carnitine               | 2         | 2 [-2-6]                        | -6.5   |
| 207 Sympathomimetics             | 10,592    | 11,991[10,912-13,070]           | -11.7  |
| Midodrine hydrochloride          | 10,588    | 11,964 [10,902-13,025]          | -11.5  |
| Etilefrine hydrochloride         | 2         | 2 [-2-5]                        | 23.8   |
| 208 Anticoagulants and protamine | 1,539,272 | 1,692,155[1,560,866-1,823,444]  | -9     |
| Warfarin sodium                  | 450,755   | 544,758 [446,913-642,602]       | -17.3  |
| Apixaban                         | 546,866   | 599,195 [566,076-632,315]       | -8.7   |
| Rivaroxaban                      | 365,237   | 406,800 [355,447-458,153]       | -10.2  |
| Edoxaban                         | 115,778   | 120,232 [107,953-132,511]       | -3.7   |
| Dabigatran etexilate             | 35,133    | 39,351 [32,901-45,801]          | -10.7  |
| Enoxaparin                       | 9,590     | 12,484 [10,854-14,114]          | -23.2  |
| Dalteparin sodium                | 6,648     | 7,821 [5,551-10,091]            | -15    |
| Tinzaparin sodium                | 4,486     | 5,592 [4,363-6,820]             | -19.8  |
| INR blood testing reagents       | 2,382     | 2,291 [1,665-2,917]             | 4      |
| Acenocoumarol                    | 1,595     | 1,740 [1,451-2,028]             | -8.3   |
| Heparin flushes                  | 563       | 514 [339-690]                   | 9.5    |
| Fondaparinux sodium              | 85        | 116 [76-156]                    | -26.8  |
| Pentosan polysulfate sodium      | 83        | 62 [27-97]                      | 33.5   |
| Phenindione                      | 47        | 49 [0-98]                       | -4.1   |
| Heparin sodium                   | 18        | 15 [-3-32]                      | 21.3   |
| Heparin calcium                  | 6         | 1 [-9-11]                       | 615.5  |
| 209 Antiplatelet drugs           | 2,657,624 | 2,790,272[2,573,500-3,007,044]  | -4.8   |
| Aspirin                          | 1,752,250 | 1,809,600 [1,628,107-1,991,093] | -3.2   |
| Clopidogrel                      | 838,203   | 912,810 [846,216-979,404]       | -8.2   |
| Ticagrelor                       | 47,546    | 53,710 [47,609-59,810]          | -11.5  |
| Dipyridamole                     | 18,395    | 16,070 [3,379-28,761]           | 14.5   |
| Prasugrel                        | 5,727     | 4,932 [4,183-5,680]             | 16.1   |
| Dipyridamole and aspirin         | 39        | -584 [-7,704-6,535]             | -106.7 |

|                                             |           |                                 |       |
|---------------------------------------------|-----------|---------------------------------|-------|
| 211 Antifibrinolytic drugs and haemostatics | 32,112    | 39,040[35,279-42,800]           | -17.7 |
| Tranexamic acid                             | 32,112    | 39,018 [35,203-42,833]          | -17.7 |
| 212 Lipid-regulating drugs                  | 6,261,716 | 6,689,544[6,272,278-7,106,810]  | -6.4  |
| Atorvastatin                                | 3,951,374 | 4,322,808 [4,025,209-4,620,407] | -8.6  |
| Simvastatin                                 | 1,612,277 | 1,665,462 [1,424,799-1,906,125] | -3.2  |
| Rosuvastatin calcium                        | 225,220   | 246,855 [231,309-262,400]       | -8.8  |
| Pravastatin sodium                          | 198,636   | 213,846 [195,428-232,265]       | -7.1  |
| Ezetimibe                                   | 155,517   | 167,717 [155,559-179,875]       | -7.3  |
| Fenofibrate                                 | 45,572    | 47,622 [44,116-51,128]          | -4.3  |
| Bezafibrate                                 | 31,046    | 33,255 [29,920-36,589]          | -6.6  |
| Colesevelam hydrochloride                   | 11,593    | 12,730 [10,213-15,248]          | -8.9  |
| Colestyramine                               | 9,516     | 11,961 [9,944-13,978]           | -20.4 |
| Fluvastatin sodium                          | 8,658     | 9,374 [8,066-10,682]            | -7.6  |
| Omega-3-acid ethyl esters                   | 7,212     | 6,174 [578-11,769]              | 16.8  |
| Ciprofibrate                                | 1,737     | 1,875 [1,344-2,405]             | -7.3  |
| Simvastatin and ezetimibe                   | 1,192     | 1,272 [707-1,836]               | -6.3  |
| Colestipol hydrochloride                    | 1,325     | 803 [119-1,487]                 | 65.1  |
| Gemfibrozil                                 | 681       | 694 [566-822]                   | -1.9  |
| Acipimox                                    | 145       | 136 [82-189]                    | 6.9   |
| Alirocumab                                  | 5         | 4 [-3-11]                       | 24.8  |
| Evolocumab                                  | 7         | 5 [1-9]                         | 44    |
| Fenofibratesimvastatin                      | 2         | 3 [-31-37]                      | -31.1 |
| 301 Bronchodilators                         | 2,420,292 | 2,638,560[2,436,988-2,840,132]  | -8.3  |
| Salbutamol                                  | 1,679,996 | 1,837,784 [1,685,292-1,990,276] | -8.6  |
| Tiotropium bromide                          | 273,104   | 292,791 [254,141-331,440]       | -6.7  |
| Beclometdipropformoterolglycopyrronium      | 90,957    | 105,694 [95,480-115,908]        | -13.9 |
| Umeclidinium bromidevilanterol              | 64,145    | 72,406 [68,735-76,078]          | -11.4 |
| Terbutaline sulphate                        | 38,143    | 37,519 [32,591-42,447]          | 1.7   |

|                                              |           |                                 |        |
|----------------------------------------------|-----------|---------------------------------|--------|
| Umeclidinium bromide                         | 45,428    | 50,185 [34,529-65,841]          | -9.5   |
| Glycopyrronium bromide                       | 44,736    | 46,648 [38,107-55,188]          | -4.1   |
| Ipratropium bromide                          | 35,277    | 36,785 [30,174-43,395]          | -4.1   |
| Theophylline                                 | 35,517    | 39,346 [36,188-42,504]          | -9.7   |
| Salmeterol                                   | 23,581    | 22,498 [15,945-29,051]          | 4.8    |
| Tiotropium bromideolodaterol                 | 23,271    | 26,476 [24,950-28,002]          | -12.1  |
| Indacaterolglycopyrronium                    | 22,506    | 27,598 [23,598-31,598]          | -18.5  |
| Aclidinium bromide                           | 20,317    | 19,523 [12,162-26,884]          | 4.1    |
| Aminophylline hydrate                        | 20,243    | 21,387 [19,258-23,517]          | -5.4   |
| Aclidinium bromideformoterol                 | 14,901    | 16,519 [12,804-20,234]          | -9.8   |
| Formoterol fumarate                          | 9,042     | 9,854 [8,468-11,241]            | -8.2   |
| Indacaterol maleate                          | 1,323     | 1,404 [961-1,847]               | -5.8   |
| Ephedrine hydrochloride                      | 440       | 472 [256-688]                   | -6.7   |
| Bambuterol hydrochloride                     | 257       | 259 [159-359]                   | -0.7   |
| Olodaterol                                   | 232       | 256 [167-345]                   | -9.3   |
| Aminophylline                                | 6         | 1 [-20-23]                      | 319.4  |
| 302 Corticosteroids (respiratory)            | 1,803,206 | 1,828,461[1,698,612-1,958,310]  | -1.4   |
| Beclometasone dipropionate                   | 1,157,024 | 1,197,565 [1,106,238-1,288,892] | -3.4   |
| Fluticasone propionate (Inhalation)          | 352,240   | 345,110 [292,856-397,363]       | 2.1    |
| Budesonide                                   | 303,261   | 307,949 [277,780-338,118]       | -1.5   |
| Fluticasone furoate (Inhalation)             | 160,510   | 178,075 [165,822-190,328]       | -9.9   |
| Ciclesonide                                  | 4,052     | 3,790 [3,252-4,328]             | 6.9    |
| 303 Cromoglycate,Rel,Leukotriene Antagonists | 290,052   | 290,169[272,325-308,014]        | 0      |
| Montelukast                                  | 288,817   | 292,811 [274,412-311,210]       | -1.4   |
| Roflumilast                                  | 523       | 688 [579-798]                   | -24    |
| Zafirlukast                                  | 7         | -605 [-3,322-2,112]             | -101.2 |
| 304 Antihist, Hyposensit & Allergic Emergen  | 1,206,536 | 1,291,810[1,123,980-1,459,639]  | -6.6   |
| Cetirizine hydrochloride                     | 373,662   | 391,127 [311,918-470,336]       | -4.5   |

|                                       |         |                           |        |
|---------------------------------------|---------|---------------------------|--------|
| Fexofenadine hydrochloride            | 375,726 | 366,818 [326,321-407,315] | 2.4    |
| Loratadine                            | 156,611 | 163,015 [127,880-198,150] | -3.9   |
| Promethazine hydrochloride            | 125,715 | 123,468 [113,314-133,622] | 1.8    |
| Chlorphenamine maleate                | 73,418  | 86,584 [68,963-104,206]   | -15.2  |
| Adrenaline                            | 32,039  | 34,263 [25,471-43,055]    | -6.5   |
| Hydroxyzine hydrochloride             | 31,652  | 34,014 [26,849-41,180]    | -6.9   |
| Desloratadine                         | 19,114  | 19,962 [16,275-23,649]    | -4.2   |
| Levocetirizine                        | 5,578   | 5,768 [2,647-8,889]       | -3.3   |
| Acrivastine                           | 4,591   | 4,708 [3,624-5,793]       | -2.5   |
| Alimemazine tartrate                  | 2,298   | 2,176 [844-3,509]         | 5.6    |
| Diphenhydramine hydrochloride         | 2,459   | 2,436 [1,740-3,131]       | 1      |
| Mizolastine                           | 2,344   | 2,326 [1,920-2,732]       | 0.8    |
| Ketotifen fumarate                    | 1,673   | 1,943 [1,435-2,452]       | -13.9  |
| Clemastine fumarate                   | 395     | 375 [303-447]             | 5.3    |
| Cyproheptadine hydrochloride          | 204     | 259 [166-353]             | -21.3  |
| Timothy grass pollen allergen extract | 149     | 187 [142-232]             | -20.3  |
| Rupatadine fumarate                   | 151     | 221 [-233-675]            | -31.7  |
| Bilastine                             | 117     | 129 [55-203]              | -9.2   |
| C1-Esterase inhibitor                 | 6       | 7 [-7-22]                 | -20    |
| Omalizumab                            | 1       | -2 [-10-6]                | -150.8 |
| 307 Mucolytics                        | 236,283 | 252,950[236,354-269,546]  | -6.6   |
| Carbocisteine                         | 230,499 | 249,662 [233,105-266,218] | -7.7   |
| Acetylcysteine                        | 6,750   | 7,168 [5,730-8,607]       | -5.8   |
| Dornase alfa                          | 697     | 676 [505-847]             | 3.1    |
| Erdosteine                            | 642     | 713 [489-938]             | -10    |
| Mannitol                              | 1       | 0 [-4-4]                  | 402.3  |
| 308 Aromatic inhalations              | 42      | 211[-49-471]              | -80.1  |
| Menthol                               | 9,456   | 10,477 [9,554-11,400]     | -9.7   |

|                                                   |           |                                |       |
|---------------------------------------------------|-----------|--------------------------------|-------|
| Benzoin                                           | 5         | 6 [-7-19]                      | -14.6 |
| Other aromatic inhalation preparations            | 1         | -3 [-12-7]                     | -138  |
| 309 Cough preparations                            | 11,562    | 14,195[-11,518-39,908]         | -18.5 |
| Codeine phosphate                                 | 406,371   | 444,122 [408,039-480,204]      | -8.5  |
| Simple                                            | 2,824     | 3,224 [-9,947-16,396]          | -12.4 |
| Pholcodine                                        | 2,232     | 2,870 [-5,269-11,010]          | -22.2 |
| Guaifenesin                                       | 71        | 120 [-2-242]                   | -41.1 |
| Dextromethorphan hydrobromide                     | 50        | 71 [-3-144]                    | -29.5 |
| Other expectorantand demulcent cough preparations | 7         | 3 [-13-19]                     | 122.5 |
| Squill                                            | 4         | 14 [-40-68]                    | -71.2 |
| Dextromethorphan hydrobrom compound preparations  | 4         | 2 [-17-21]                     | 63    |
| 310 Systemic nasal decongestants                  | 1,642     | 2,022[-1,413-5,458]            | -18.8 |
| Pseudoephedrine hydrochloride                     | 1,580     | 1,956 [-1,470-5,382]           | -19.2 |
| 401 Hypnotics and anxiolytics                     | 1,128,147 | 1,212,813[1,119,950-1,305,676] | -7    |
| Zopiclone                                         | 401,556   | 424,811 [389,737-459,885]      | -5.5  |
| Diazepam                                          | 367,822   | 419,818 [385,866-453,769]      | -12.4 |
| Melatonin                                         | 96,367    | 98,622 [92,162-105,082]        | -2.3  |
| Lorazepam                                         | 89,040    | 93,417 [86,184-100,650]        | -4.7  |
| Temazepam                                         | 65,362    | 68,967 [50,519-87,415]         | -5.2  |
| Zolpidem tartrate                                 | 48,958    | 52,902 [48,303-57,500]         | -7.5  |
| Nitrazepam                                        | 30,766    | 32,429 [26,955-37,904]         | -5.1  |
| Buspirone hydrochloride                           | 15,177    | 15,870 [14,792-16,948]         | -4.4  |
| Oxazepam                                          | 5,383     | 5,666 [4,933-6,399]            | -5    |
| Chlordiazepoxide hydrochloride                    | 3,186     | 2,679 [179-5,179]              | 18.9  |
| Lormetazepam                                      | 1,228     | 1,659 [1,308-2,010]            | -26   |
| Loprazolam mesilate                               | 1,246     | 236 [-852-1,324]               | 428.5 |
| Chloral hydrate                                   | 1,016     | 1,039 [927-1,152]              | -2.3  |
| Clomethiazole                                     | 665       | 431 [-11-874]                  | 54.1  |

|                                                  |           |                                |       |
|--------------------------------------------------|-----------|--------------------------------|-------|
| Sodium oxybate                                   | 90        | 104 [74-133]                   | -13.2 |
| Amobarbital sodium                               | 80        | 76 [29-123]                    | 5.2   |
| Secobarbital sodium                              | 93        | 76 [19-133]                    | 21.9  |
| Cloral betaine                                   | 51        | 91 [-342-523]                  | -43.7 |
| Meprobamate                                      | 22        | 23 [-22-67]                    | -3.4  |
| Clomethiazole edisilate                          | 23        | 149 [71-228]                   | -84.6 |
| Butobarbital                                     | 14        | 20 [-11-52]                    | -31.3 |
| Alprazolam                                       | 2         | 1 [-2-3]                       | 142.9 |
| 402 Drugs used in psychoses and related disorder | 1,023,518 | 1,074,911[1,005,397-1,144,425] | -4.8  |
| Quetiapine                                       | 315,212   | 330,028 [308,946-351,110]      | -4.5  |
| Olanzapine                                       | 200,989   | 214,363 [199,279-229,447]      | -6.2  |
| Risperidone                                      | 141,511   | 148,731 [137,899-159,563]      | -4.9  |
| Aripiprazole                                     | 105,099   | 110,448 [103,740-117,157]      | -4.8  |
| Lithium carbonate                                | 70,409    | 74,481 [69,580-79,383]         | -5.5  |
| Valproic acid                                    | 47,785    | 50,528 [45,633-55,424]         | -5.4  |
| Amisulpride                                      | 32,595    | 34,140 [31,707-36,574]         | -4.5  |
| Haloperidol                                      | 29,048    | 25,736 [20,559-30,912]         | 12.9  |
| Chlorpromazine hydrochloride                     | 19,718    | 20,473 [18,202-22,743]         | -3.7  |
| Promazine hydrochloride                          | 9,744     | 10,395 [8,915-11,875]          | -6.3  |
| Levomepromazine hydrochloride                    | 11,968    | 8,748 [6,392-11,104]           | 36.8  |
| Sulpiride                                        | 9,075     | 10,547 [9,479-11,616]          | -14   |
| Zuclopenthixol hydrochloride                     | 6,961     | 7,171 [6,582-7,759]            | -2.9  |
| Pericyazine                                      | 4,891     | 5,037 [4,002-6,072]            | -2.9  |
| Flupentixol decanoate                            | 3,613     | 3,943 [3,596-4,290]            | -8.4  |
| Trifluoperazine                                  | 2,752     | 2,559 [1,613-3,505]            | 7.5   |
| Levomepromazine maleate                          | 3,058     | 2,894 [2,127-3,661]            | 5.7   |
| Zuclopenthixol decanoate                         | 2,484     | 2,515 [2,236-2,794]            | -1.2  |
| Lurasidone                                       | 1,704     | 1,679 [1,457-1,901]            | 1.5   |

|                             |           |                                 |       |
|-----------------------------|-----------|---------------------------------|-------|
| Paliperidone                | 1,178     | 1,263 [1,058-1,468]             | -6.7  |
| Haloperidol decanoate       | 665       | 720 [519-920]                   | -7.6  |
| Lithium citrate             | 595       | 629 [532-725]                   | -5.4  |
| Benperidol                  | 351       | 385 [327-444]                   | -8.9  |
| Pimozide                    | 294       | 295 [175-414]                   | -0.2  |
| Clozapine                   | 240       | 184 [109-259]                   | 30.3  |
| Fluphenazine decanoate      | 127       | 92 [-192-377]                   | 37.6  |
| Asenapine                   | 60        | 89 [38-139]                     | -32.5 |
| Cariprazine                 | 63        | 39 [22-56]                      | 61.2  |
| Perphenazine                | 28        | 25 [-3-53]                      | 11.2  |
| Thioridazine                | 19        | 16 [-28-61]                     | 15.2  |
| Olanzapine embonate         | 16        | 13 [4-23]                       | 19.4  |
| Fluphenazine hydrochloride  | 8         | 7 [-3-16]                       | 16.7  |
| Zuclopenthixol acetate      | 6         | 5 [-18-27]                      | 22.1  |
| 403 Antidepressant drugs    | 6,221,692 | 6,707,694[6,274,110-7,141,278]  | -7.2  |
| Sertraline hydrochloride    | 1,456,678 | 1,580,538 [1,479,498-1,681,578] | -7.8  |
| Citalopram hydrobromide     | 1,118,399 | 1,238,880 [1,134,116-1,343,644] | -9.7  |
| Amitriptyline hydrochloride | 1,149,789 | 1,247,909 [1,162,080-1,333,739] | -7.9  |
| Mirtazapine                 | 824,631   | 885,826 [829,827-941,826]       | -6.9  |
| Fluoxetine hydrochloride    | 557,540   | 604,272 [556,559-651,985]       | -7.7  |
| Venlafaxine                 | 399,069   | 420,465 [394,087-446,843]       | -5.1  |
| Duloxetine hydrochloride    | 253,200   | 273,670 [256,957-290,383]       | -7.5  |
| Escitalopram                | 107,864   | 118,226 [110,935-125,517]       | -8.8  |
| Paroxetine hydrochloride    | 104,726   | 113,209 [104,862-121,557]       | -7.5  |
| Trazodone hydrochloride     | 94,427    | 102,342 [95,098-109,586]        | -7.7  |
| Nortriptyline               | 55,071    | 60,056 [54,942-65,170]          | -8.3  |
| Dosulepin hydrochloride     | 40,471    | 40,721 [30,680-50,763]          | -0.6  |
| Clomipramine hydrochloride  | 18,290    | 19,275 [15,399-23,151]          | -5.1  |

|                                            |         |                          |       |
|--------------------------------------------|---------|--------------------------|-------|
| Vortioxetine                               | 14,452  | 14,638 [13,365-15,911]   | -1.3  |
| Lofepamine hydrochloride                   | 13,041  | 13,227 [11,421-15,033]   | -1.4  |
| Flupentixol hydrochloride                  | 13,448  | 14,014 [12,793-15,236]   | -4    |
| Imipramine hydrochloride                   | 11,053  | 12,370 [10,694-14,047]   | -10.7 |
| Citalopram hydrochloride                   | 5,323   | 5,921 [5,293-6,548]      | -10.1 |
| Trimipramine maleate                       | 2,026   | 1,878 [1,177-2,580]      | 7.9   |
| Reboxetine                                 | 1,870   | 1,950 [1,651-2,250]      | -4.1  |
| Doxepin                                    | 1,753   | 1,850 [1,510-2,190]      | -5.2  |
| Fluvoxamine maleate                        | 1,708   | 2,047 [1,638-2,457]      | -16.6 |
| Agomelatine                                | 1,688   | 1,653 [1,419-1,888]      | 2.1   |
| Moclobemide                                | 506     | 1,156 [830-1,483]        | -56.2 |
| Phenelzine sulfate                         | 378     | 587 [276-897]            | -35.6 |
| Tranlycypromine sulfate                    | 468     | 556 [443-668]            | -15.8 |
| Isocarboxazid                              | 155     | 161 [118-204]            | -3.8  |
| Tryptophan                                 | 93      | 86 [35-137]              | 7.9   |
| Mianserin hydrochloride                    | 33      | 171 [55-287]             | -80.7 |
| Nefazodone hydrochloride                   | 12      | 6 [-5-17]                | 101.2 |
| Oxitriptan                                 | 6       | 11 [2-19]                | -43.6 |
| 404 CNS stimulants and drugs used for ADHD | 125,194 | 139,583[130,385-148,781] | -10.3 |
| Methylphenidate hydrochloride              | 86,016  | 99,908 [93,000-106,815]  | -13.9 |
| Lisdexamfetamine dimesylate                | 15,822  | 17,448 [16,052-18,845]   | -9.3  |
| Atomoxetine hydrochloride                  | 10,154  | 10,964 [10,063-11,865]   | -7.4  |
| Modafinil                                  | 6,560   | 7,169 [6,671-7,668]      | -8.5  |
| Dexamfetamine sulfate                      | 3,915   | 4,263 [3,921-4,606]      | -8.2  |
| Guanfacine                                 | 2,697   | 2,741 [2,502-2,980]      | -1.6  |
| Pitolisant hydrochloride                   | 24      | 23 [14-32]               | 3.8   |
| Caffeine                                   | 4       | 5 [0-10]                 | -19.2 |
| Caffeine citrate                           | 2       | 1 [-7-9]                 | 62.2  |

|                                              |           |                                 |       |
|----------------------------------------------|-----------|---------------------------------|-------|
| 405 Obesity                                  | 22,177    | 29,310[25,435-33,185]           | -24.3 |
| Orlistat                                     | 22,171    | 29,307 [25,431-33,184]          | -24.3 |
| Naltrexonebupropion                          | 6         | 3 [-1-7]                        | 97.4  |
| 406 Drugs used in nausea and vertigo         | 471,979   | 516,036[446,647-585,426]        | -8.5  |
| Betahistine hydrochloride                    | 128,662   | 142,590 [131,578-153,602]       | -9.8  |
| Prochlorperazine maleate                     | 110,857   | 129,005 [115,713-142,297]       | -14.1 |
| Cyclizine hydrochloride                      | 75,705    | 81,492 [72,410-90,575]          | -7.1  |
| Metoclopramide hydrochloride                 | 56,075    | 55,931 [46,605-65,256]          | 0.3   |
| Domperidone                                  | 25,832    | 34,707 [-16,938-86,353]         | -25.6 |
| Cinnarizine                                  | 25,802    | 28,712 [25,639-31,784]          | -10.1 |
| Ondansetron hydrochloride                    | 20,290    | 23,071 [21,211-24,930]          | -12.1 |
| Hyoscine                                     | 10,303    | 11,544 [9,837-13,251]           | -10.8 |
| Hyoscine hydrobromide                        | 9,388     | 9,006 [4,481-13,532]            | 4.2   |
| Cyclizine lactate                            | 7,358     | 6,024 [4,149-7,899]             | 22.1  |
| Promethazine teoclate                        | 2,230     | 2,322 [515-4,129]               | -3.9  |
| Prochlorperazine mesilate                    | 563       | 293 [-225-810]                  | 92.4  |
| Dimenhydrinatecinnarizine                    | 418       | 455 [373-537]                   | -8.1  |
| Doxylamine succinatepyridoxine hydrochloride | 293       | 344 [217-470]                   | -14.7 |
| Flunarizine dihydrochloride                  | 150       | 124 [89-159]                    | 21    |
| Ketamine hydrochloride                       | 118       | 114 [61-167]                    | 3.4   |
| Granisetron hydrochloride                    | 52        | 48 [7-90]                       | 7.3   |
| Nabilone                                     | 45        | 13 [-71-96]                     | 252.6 |
| Granisetron                                  | 43        | 35 [5-65]                       | 22.6  |
| Aprepitant                                   | 21        | 4 [-13-20]                      | 498.1 |
| 407 Analgesics                               | 4,956,161 | 5,270,409[4,824,101-5,716,718]  | -6    |
| Paracetamol                                  | 1,433,376 | 1,424,009 [1,245,782-1,602,237] | 0.7   |
| Co-codamol (Codeine phosphateparacetamol)    | 1,207,965 | 1,295,723 [1,195,447-1,395,999] | -6.8  |
| Tramadol hydrochloride                       | 475,784   | 505,076 [452,154-557,998]       | -5.8  |

|                                                           |         |                           |        |
|-----------------------------------------------------------|---------|---------------------------|--------|
| Morphine sulfate                                          | 421,459 | 449,179 [412,661-485,697] | -6.2   |
| Buprenorphine                                             | 192,659 | 214,570 [196,359-232,782] | -10.2  |
| Methadone hydrochloride                                   | 158,158 | 160,794 [145,770-175,818] | -1.6   |
| Sumatriptan succinate                                     | 145,345 | 160,860 [147,889-173,832] | -9.6   |
| Oxycodone hydrochloride                                   | 144,889 | 159,797 [147,655-171,940] | -9.3   |
| Co-dydramol (Dihydrocodeineparacetamol)                   | 131,321 | 138,194 [120,846-155,541] | -5     |
| Dihydrocodeine tartrate                                   | 120,411 | 131,348 [121,041-141,655] | -8.3   |
| Fentanyl                                                  | 78,321  | 86,404 [77,932-94,876]    | -9.4   |
| Pizotifen malate                                          | 41,273  | 45,828 [42,327-49,330]    | -9.9   |
| Zolmitriptan                                              | 28,330  | 32,228 [29,510-34,946]    | -12.1  |
| Clonidine hydrochloride                                   | 28,406  | 36,470 [33,224-39,716]    | -22.1  |
| Rizatriptan                                               | 25,872  | 28,499 [26,392-30,605]    | -9.2   |
| Nefopam hydrochloride                                     | 22,086  | 21,526 [6,016-37,037]     | 2.6    |
| Tapentadol hydrochloride                                  | 13,338  | 14,650 [13,301-15,999]    | -9     |
| Naratriptan hydrochloride                                 | 11,302  | 12,198 [10,965-13,432]    | -7.3   |
| Analgesics with anti-emetics                              | 10,516  | 10,122 [3,796-16,448]     | 3.9    |
| Meptazinol hydrochloride                                  | 5,529   | 6,138 [5,594-6,682]       | -9.9   |
| Frovatriptan                                              | 4,424   | 4,906 [4,483-5,329]       | -9.8   |
| Diamorphine hydrochloride (Systemic)                      | 3,506   | 5,189 [2,692-7,686]       | -32.4  |
| Oxycodone hydrochloridenaloxone hydrochloride             | 3,038   | 3,116 [2,517-3,715]       | -2.5   |
| Almotriptan                                               | 3,007   | 3,565 [3,170-3,959]       | -15.6  |
| Eletriptan                                                | 1,296   | 1,283 [1,110-1,456]       | 1      |
| Pethidine hydrochloride                                   | 1,007   | 1,397 [1,117-1,676]       | -27.9  |
| Co-proxamol (Dextropropoxyphene hydrochlorideparacetamol) | 1,055   | -121 [-3,019-2,776]       | -970.4 |
| Hydromorphone hydrochloride                               | 595     | 725 [589-861]             | -17.9  |
| Tolfenamic acid                                           | 399     | 454 [327-582]             | -12.2  |
| Paracetamol combined preparations                         | 394     | 403 [304-501]             | -2.2   |
| Dipipanone hydrochloride                                  | 154     | 110 [-400-619]            | 40.3   |

|                                          |           |                                |       |
|------------------------------------------|-----------|--------------------------------|-------|
| Pentazocine hydrochloride                | 117       | 112 [65-159]                   | 4.8   |
| Ergotamine tartrate                      | 96        | 129 [-191-449]                 | -25.8 |
| Isometheptene mucate                     | 47        | 178 [132-224]                  | -73.6 |
| Morphine tartrate and cyclizine tartrate | 40        | 25 [-69-119]                   | 60.2  |
| Other non-opioid analgesic preparations  | 21        | 19 [-6-44]                     | 11    |
| Aspirin combined preparations            | 10        | 18 [-10-47]                    | -45.8 |
| Paracetamol and caffeine                 | 26        | 17 [-7-40]                     | 55.1  |
| Paracetamol and ibuprofen                | 13        | 17 [1-33]                      | -24.7 |
| Co-codaprin (Codeine phosphateaspirin)   | 3         | 11 [-28-49]                    | -71.9 |
| Aspirin and caffeine                     | 3         | 2 [-7-11]                      | 47.3  |
| Erenumab                                 | 1         | 3 [2-4]                        | -68.2 |
| Gabapentin (Neuropathic Pain)            | 2         | 3 [-1-7]                       | -35.5 |
| 408 Antiepileptic drugs                  | 2,375,283 | 2,533,066[2,345,680-2,720,452] | -6.2  |
| Pregabalin                               | 620,239   | 661,918 [608,630-715,207]      | -6.3  |
| Gabapentin                               | 589,417   | 612,472 [550,170-674,775]      | -3.8  |
| Lamotrigine                              | 249,954   | 267,133 [251,276-282,990]      | -6.4  |
| Levetiracetam                            | 205,140   | 221,612 [207,632-235,593]      | -7.4  |
| Sodium valproate                         | 199,287   | 215,452 [198,628-232,277]      | -7.5  |
| Carbamazepine                            | 179,929   | 194,109 [180,545-207,674]      | -7.3  |
| Topiramate                               | 82,120    | 87,328 [81,432-93,223]         | -6    |
| Clonazepam                               | 81,474    | 87,258 [80,812-93,704]         | -6.6  |
| Phenytoin sodium                         | 51,501    | 54,867 [49,679-60,054]         | -6.1  |
| Midazolam hydrochloride                  | 31,731    | 25,974 [21,646-30,302]         | 22.2  |
| Clobazam                                 | 27,050    | 28,922 [26,966-30,879]         | -6.5  |
| Phenobarbital                            | 14,545    | 15,592 [14,183-17,000]         | -6.7  |
| Lacosamide                               | 14,657    | 15,573 [14,560-16,586]         | -5.9  |
| Zonisamide                               | 13,786    | 14,825 [13,854-15,797]         | -7    |
| Primidone                                | 12,568    | 13,546 [12,588-14,504]         | -7.2  |

|                                                      |         |                           |       |
|------------------------------------------------------|---------|---------------------------|-------|
| Oxcarbazepine                                        | 8,795   | 9,648 [8,942-10,355]      | -8.8  |
| Perampanel                                           | 4,292   | 4,882 [4,446-5,318]       | -12.1 |
| Ethosuximide                                         | 3,231   | 3,349 [3,102-3,595]       | -3.5  |
| Brivaracetam                                         | 3,205   | 3,339 [2,820-3,857]       | -4    |
| Eslicarbazepine acetate                              | 1,999   | 2,237 [2,051-2,424]       | -10.7 |
| Phenytoin                                            | 1,430   | 1,384 [1,055-1,714]       | 3.3   |
| Midazolam maleate                                    | 1,350   | 1,909 [1,155-2,663]       | -29.3 |
| Vigabatrin                                           | 1,030   | 1,198 [1,076-1,321]       | -14   |
| Rufinamide                                           | 1,034   | 1,063 [906-1,220]         | -2.7  |
| Stiripentol                                          | 204     | 254 [206-303]             | -19.8 |
| Paraldehyde                                          | 97      | 122 [78-166]              | -20.5 |
| Tiagabine                                            | 130     | 97 [39-155]               | 33.9  |
| Phenobarbital sodium                                 | 25      | 28 [-4-60]                | -11.2 |
| Sultiame                                             | 26      | 34 [-37-104]              | -22.5 |
| Felbamate                                            | 6       | 5 [-9-18]                 | 27.7  |
| 409 Drugs used in Parkinsonism and related disorders | 420,231 | 458,067[428,087-488,046]  | -8.3  |
| Co-careldopa (Carbidopalevodopa)                     | 102,262 | 113,824 [106,270-121,378] | -10.2 |
| Co-beneldopa (Benserazidelevodopa)                   | 81,115  | 88,742 [82,933-94,552]    | -8.6  |
| Procyclidine hydrochloride                           | 72,352  | 77,290 [72,066-82,515]    | -6.4  |
| Ropinirole hydrochloride                             | 51,704  | 55,886 [52,162-59,611]    | -7.5  |
| Pramipexole                                          | 38,508  | 41,270 [38,221-44,320]    | -6.7  |
| Rasagiline mesilate                                  | 15,897  | 17,480 [15,677-19,284]    | -9.1  |
| Levodopacarbidopaentacapone                          | 11,820  | 13,050 [11,809-14,291]    | -9.4  |
| Amantadine hydrochloride                             | 10,423  | 11,609 [10,738-12,480]    | -10.2 |
| Rotigotine                                           | 10,522  | 11,368 [10,230-12,506]    | -7.4  |
| Trihexyphenidyl hydrochloride                        | 9,732   | 10,520 [9,613-11,428]     | -7.5  |
| Entacapone                                           | 3,941   | 3,961 [3,601-4,322]       | -0.5  |
| Tetrabenazine                                        | 2,436   | 2,483 [2,185-2,782]       | -1.9  |

|                                                |         |                           |         |
|------------------------------------------------|---------|---------------------------|---------|
| Selegiline hydrochloride                       | 2,224   | 2,412 [2,081-2,743]       | -7.8    |
| Riluzole                                       | 1,681   | 1,756 [1,600-1,913]       | -4.3    |
| Opicapone                                      | 1,729   | 2,860 [2,455-3,265]       | -39.5   |
| Safinamide                                     | 1,327   | 1,700 [1,473-1,926]       | -21.9   |
| Apomorphine hydrochloride                      | 804     | 992 [868-1,115]           | -18.9   |
| Piracetam                                      | 644     | 666 [570-762]             | -3.3    |
| Orphenadrine hydrochloride                     | 513     | 310 [-2,152-2,773]        | 65.3    |
| Tolcapone                                      | 28      | 39 [13-65]                | -28.5   |
| Apomorphine hydrochloride hemihydrate          | 30      | -7 [-44-30]               | -528.6  |
| Botulinum toxin type A                         | 7       | 13 [-1-26]                | -44.5   |
| Benzatropine mesilate                          | 57      | 12 [-14-37]               | 387     |
| 410 Drugs used in substance dependence         | 284,036 | 293,277[258,535-328,019]  | -3.2    |
| Methadone hydrochloride                        | 158,158 | 160,794 [145,770-175,818] | -1.6    |
| Buprenorphine hydrochloride                    | 66,898  | 62,234 [57,918-66,551]    | 7.5     |
| Nicotine                                       | 27,044  | 32,492 [19,392-45,591]    | -16.8   |
| Varenicline tartrate                           | 16,749  | 23,199 [15,821-30,577]    | -27.8   |
| Acamprosate calcium                            | 10,399  | 10,491 [9,423-11,559]     | -0.9    |
| Disulfiram                                     | 2,274   | 2,416 [1,197-3,636]       | -5.9    |
| Bupropion hydrochloride                        | 2,217   | 2,322 [2,098-2,545]       | -4.5    |
| Naltrexone hydrochloride                       | 1,375   | 1,442 [1,086-1,797]       | -4.6    |
| Buprenorph hydrochloridenaloxone hydrochloride | 654     | -30 [-2,080-2,021]        | -2314.2 |
| Nicotine bitartrate                            | 257     | 195 [70-320]              | 31.8    |
| Nalmefene                                      | 69      | 168 [-191-528]            | -59     |
| 411 Dementia                                   | 324,923 | 364,083[334,301-393,866]  | -10.8   |
| Donepezil hydrochloride                        | 164,831 | 183,192 [166,954-199,431] | -10     |
| Memantine hydrochloride                        | 116,880 | 131,506 [121,570-141,441] | -11.1   |
| Rivastigmine                                   | 30,721  | 34,684 [31,718-37,651]    | -11.4   |
| Galantamine                                    | 12,491  | 13,361 [11,550-15,172]    | -6.5    |

|                                                |           |                                 |       |
|------------------------------------------------|-----------|---------------------------------|-------|
| 501 Antibacterial drugs                        | 1,982,597 | 2,426,260 [1,991,176-2,861,344] | -18.3 |
| Amoxicillin                                    | 280,698   | 469,820 [243,547-696,092]       | -40.3 |
| Nitrofurantoin                                 | 325,251   | 376,602 [324,622-428,583]       | -13.6 |
| Doxycycline hyclate                            | 197,558   | 231,019 [190,248-271,789]       | -14.5 |
| Flucloxacillin sodium                          | 302,504   | 322,652 [270,322-374,983]       | -6.2  |
| Phenoxymethylpenicillin (Penicillin V)         | 109,473   | 206,060 [163,045-249,076]       | -46.9 |
| Clarithromycin                                 | 114,283   | 163,723 [122,435-205,012]       | -30.2 |
| Trimethoprim                                   | 123,457   | 97,208 [39,536-154,880]         | 27    |
| Co-amoxiclav (Amoxicillin/clavulanic acid)     | 101,622   | 100,476 [73,729-127,222]        | 1.1   |
| Lymecycline                                    | 78,424    | 94,497 [85,600-103,394]         | -17   |
| Azithromycin                                   | 64,459    | 66,817 [61,674-71,959]          | -3.5  |
| Metronidazole                                  | 65,592    | 76,395 [68,365-84,425]          | -14.1 |
| Cefalexin                                      | 61,360    | 61,927 [48,764-75,091]          | -0.9  |
| Ciprofloxacin                                  | 41,873    | 42,497 [33,828-51,165]          | -1.5  |
| Oxytetracycline                                | 22,150    | 23,538 [18,564-28,511]          | -5.9  |
| Pivmecillinam hydrochloride                    | 22,231    | 24,351 [19,537-29,165]          | -8.7  |
| Erythromycin ethylsuccinate                    | 7,855     | 11,466 [-677-23,610]            | -31.5 |
| Co-trimoxazole (Trimethoprim/sulfamethoxazole) | 15,496    | 16,131 [14,886-17,377]          | -3.9  |
| Methenamine hippurate                          | 9,250     | 7,241 [5,446-9,035]             | 27.7  |
| Rifaximin                                      | 6,651     | 6,891 [6,390-7,393]             | -3.5  |
| Clindamycin hydrochloride                      | 6,910     | 7,266 [6,300-8,232]             | -4.9  |
| Fosfomycin trometamol                          | 5,944     | 6,331 [5,473-7,190]             | -6.1  |
| Ofloxacin                                      | 4,868     | 4,746 [3,614-5,877]             | 2.6   |
| Colistimethate sodium                          | 2,978     | 2,923 [2,565-3,280]             | 1.9   |
| Levofloxacin                                   | 2,117     | 2,620 [2,293-2,946]             | -19.2 |
| Sodium fusidate                                | 2,225     | 2,592 [1,835-3,350]             | -14.2 |
| Dapsone                                        | 2,205     | 2,308 [2,097-2,519]             | -4.5  |
| Tetracycline                                   | 1,599     | 1,708 [1,316-2,101]             | -6.4  |

|                                         |       |                     |        |
|-----------------------------------------|-------|---------------------|--------|
| Minocycline hydrochloride               | 1,673 | 1,890 [1,138-2,643] | -11.5  |
| Cefradine                               | 1,520 | 1,415 [847-1,982]   | 7.4    |
| Rifampicin                              | 1,369 | 1,428 [1,183-1,674] | -4.2   |
| Isoniazid                               | 1,075 | 1,331 [845-1,816]   | -19.2  |
| Doxycycline monohydrate                 | 800   | 370 [-315-1,056]    | 116    |
| Erythromycin stearate                   | 549   | 1,433 [-149-3,015]  | -61.7  |
| Cefaclor                                | 517   | 959 [266-1,651]     | -46.1  |
| Moxifloxacin                            | 343   | 425 [321-529]       | -19.2  |
| Demeclocycline hydrochloride            | 431   | 357 [-492-1,205]    | 20.9   |
| Ethambutol hydrochloride                | 376   | 432 [303-561]       | -12.9  |
| Vancomycin hydrochloride                | 418   | 356 [240-471]       | 17.6   |
| Cefuroxime axetil                       | 321   | 341 [170-512]       | -5.9   |
| Rifampicin combined preparations        | 88    | 154 [27-280]        | -42.7  |
| Tinidazole                              | 93    | 132 [5-260]         | -29.8  |
| Cefixime                                | 130   | 118 [-41-277]       | 9.8    |
| Linezolid                               | 132   | 99 [53-145]         | 32.7   |
| Ampicillin                              | 80    | 87 [9-164]          | -7.6   |
| Tobramycin                              | 90    | 65 [-1-131]         | 39     |
| Co-fluampicil(Flucloxacillinampicillin) | 113   | -345 [-1,101-410]   | -132.7 |
| Ceftriaxone sodium                      | 97    | 61 [-9-130]         | 59.4   |
| Cefadroxil                              | 40    | -27 [-253-198]      | -245.9 |
| Teicoplanin                             | 61    | 63 [-82-208]        | -3.5   |
| Sulfadiazine                            | 25    | -4 [-197-188]       | -660.7 |
| Benzylpenicillin sodium (Penicillin G)  | 11    | 32 [-25-88]         | -65.4  |
| Meropenem                               | 18    | 6 [-30-43]          | 179.4  |
| Fidaxomicin                             | 14    | 12 [0-24]           | 20.6   |
| Rifabutin                               | 23    | 20 [3-38]           | 14.6   |
| Amoxicillin sodium                      | 8     | 10 [-13-33]         | -17.2  |

|                                       |         |                          |        |
|---------------------------------------|---------|--------------------------|--------|
| Ertapenem sodium                      | 21      | 8 [-75-90]               | 171.6  |
| Ceftazidime pentahydrate              | 14      | 13 [-6-32]               | 8.7    |
| Clofazimine                           | 11      | 8 [2-14]                 | 41.5   |
| Pyrazinamide                          | 9       | 14 [-13-40]              | -35.5  |
| Norfloxacin                           | 4       | 12 [-35-59]              | -65.8  |
| Piperacillin sodium/tazobactam sodium | 3       | 4 [-106-114]             | -32.6  |
| Cefotaxime sodium                     | 3       | 3 [-9-15]                | -10.8  |
| Aztreonam                             | 2       | 2 [-4-8]                 | 14.7   |
| Cefuroxime sodium                     | 9       | 15 [1-29]                | -39.6  |
| Fosfomycin calcium                    | 3       | 13 [-17-44]              | -77.6  |
| Flucloxacillin magnesium              | 1       | -1 [-8-6]                | -194.9 |
| Pristinamycin                         | 3       | -3 [-9-3]                | -200.7 |
| Aminosalicic acid                     | 2       | 2 [-16-20]               | -10.5  |
| 502 Antifungal drugs                  | 124,989 | 140,361[125,358-155,365] | -11    |
| Nystatin                              | 53,571  | 55,060 [46,669-63,452]   | -2.7   |
| Terbinafine hydrochloride             | 35,558  | 51,174 [42,589-59,758]   | -30.5  |
| Fluconazole                           | 42,360  | 43,737 [39,088-48,387]   | -3.1   |
| Itraconazole                          | 6,341   | 8,343 [7,005-9,681]      | -24    |
| Griseofulvin                          | 315     | 339 [192-486]            | -7     |
| Voriconazole                          | 35      | 28 [-8-65]               | 24.7   |
| Posaconazole                          | 29      | 23 [-12-59]              | 24.9   |
| Amphotericin                          | 7       | 9 [-2-20]                | -23.3  |
| 503 Antiviral drugs                   | 81,453  | 91,427[83,259-99,596]    | -10.9  |
| Aciclovir                             | 85,696  | 96,491 [90,109-102,873]  | -11.2  |
| Valaciclovir                          | 3,283   | 4,033 [3,724-4,342]      | -18.6  |
| Oseltamivir phosphate                 | 61      | 236 [-11,990-12,462]     | -74.2  |
| Famciclovir                           | 476     | 492 [354-630]            | -3.3   |
| Lamivudine                            | 284     | 316 [259-373]            | -10.2  |

|                                              |         |                           |         |
|----------------------------------------------|---------|---------------------------|---------|
| Entecavir                                    | 95      | 105 [46-163]              | -9.3    |
| Tenofovir disoproxil                         | 132     | 101 [55-146]              | 30.8    |
| Valganciclovir hydrochloride                 | 57      | 40 [2-78]                 | 42.6    |
| Zanamivir                                    | 1       | 5 [-22-31]                | -78.9   |
| Inosine pranobex                             | 17      | 21 [6-36]                 | -18.2   |
| Emtricitabine and tenofovir disoproxil       | 11      | 22 [5-38]                 | -48.9   |
| Efavirenz/emtricitabine/tenofovir disoproxil | 6       | 5 [-5-15]                 | 12.2    |
| Darunavir                                    | 2       | 1 [-13-16]                | 36.1    |
| Raltegravir                                  | 7       | 20 [6-34]                 | -65.1   |
| Abacavir and lamivudine                      | 2       | 2 [-4-8]                  | 10.6    |
| Adefovir dipivoxil                           | 7       | 4 [-5-14]                 | 60.4    |
| Ribavirin                                    | 1       | -2 [-31-27]               | -160.4  |
| Emtricitabine and tenofovir alafenamide      | 2       | 4 [2-7]                   | -53.2   |
| Dolutegravir                                 | 3       | 6 [-2-13]                 | -46     |
| Ritonavir                                    | 1       | 3 [-10-17]                | -68.2   |
| Nevirapine                                   | 2       | 0 [-4-5]                  | 343     |
| Other HIV infection preparations             | 2       | 7 [-2-16]                 | -71.3   |
| 504 Antiprotozoal drugs                      | 219,928 | 244,930[218,780-271,080]  | -10.2   |
| Quinine sulfate                              | 195,251 | 220,056 [198,450-241,661] | -11.3   |
| Quinine bisulfate                            | 24,295  | 29,937 [19,843-40,031]    | -18.8   |
| Mepacrine hydrochloride                      | 208     | 119 [54-184]              | 74.6    |
| Chloroquine phosphate                        | 105     | 91 [25-157]               | 15.8    |
| Proguanil hydrochloride with atovaquone      | 9       | 12 [-141-165]             | -24.9   |
| Atovaquone                                   | 36      | 34 [9-59]                 | 7.2     |
| Mefloquine hydrochloride                     | 6       | -317 [-1,230-595]         | -101.9  |
| Pyrimethamine                                | 16      | 23 [11-36]                | -31.2   |
| Pentamidine isetionate                       | 2       | 0 [-4-4]                  | -4405.3 |
| 505 Anthelmintics                            | 7,195   | 6,523[4,203-8,844]        | 10.3    |

|                                |           |                                 |       |
|--------------------------------|-----------|---------------------------------|-------|
| Mebendazole                    | 7,072     | 6,427 [4,119-8,734]             | 10    |
| Albendazole                    | 21        | 26 [8-43]                       | -17.8 |
| Levamisole hydrochloride       | 32        | 25 [1-49]                       | 26.5  |
| Praziquantel                   | 12        | 7 [-7-20]                       | 84.1  |
| 601 Drugs used in diabetes     | 4,614,557 | 5,065,472[4,730,333-5,400,610]  | -8.9  |
| Metformin hydrochloride        | 1,836,717 | 2,001,862 [1,868,300-2,135,424] | -8.2  |
| Glucose blood testing reagents | 527,986   | 564,839 [511,845-617,833]       | -6.5  |
| Gliclazide                     | 526,485   | 567,653 [520,149-615,157]       | -7.3  |
| Insulin aspart                 | 149,380   | 169,555 [157,591-181,519]       | -11.9 |
| Sitagliptin                    | 191,875   | 208,538 [186,537-230,538]       | -8    |
| Linagliptin                    | 180,861   | 207,435 [191,523-223,346]       | -12.8 |
| Insulin glargine               | 123,802   | 137,376 [127,744-147,009]       | -9.9  |
| Empagliflozin                  | 135,842   | 151,221 [143,680-158,761]       | -10.2 |
| Alogliptin                     | 124,652   | 142,834 [130,535-155,133]       | -12.7 |
| Dapagliflozin                  | 102,599   | 111,051 [91,844-130,257]        | -7.6  |
| Biphasic insulin aspart        | 60,507    | 66,054 [60,309-71,799]          | -8.4  |
| Biphasic isophane insulin      | 56,137    | 62,907 [56,047-69,768]          | -10.8 |
| Insulin detemir                | 45,207    | 52,097 [46,967-57,227]          | -13.2 |
| Pioglitazone hydrochloride     | 56,211    | 59,984 [49,792-70,176]          | -6.3  |
| Isophane insulin               | 50,995    | 57,037 [51,079-62,996]          | -10.6 |
| Dulaglutide                    | 52,732    | 61,210 [58,819-63,600]          | -13.9 |
| Glimepiride                    | 46,838    | 48,971 [44,304-53,638]          | -4.4  |
| Canagliflozin                  | 45,216    | 50,425 [42,229-58,621]          | -10.3 |
| Insulin Lispro                 | 32,746    | 37,219 [34,528-39,909]          | -12   |
| Insulin degludec               | 33,231    | 41,568 [37,686-45,451]          | -20.1 |
| Liraglutide                    | 38,309    | 46,186 [40,743-51,629]          | -17.1 |
| Ketone blood testing reagents  | 24,490    | 24,734 [22,967-26,501]          | -1    |
| Glucose                        | 24,562    | 29,286 [27,025-31,548]          | -16.1 |

|                                     |        |                        |       |
|-------------------------------------|--------|------------------------|-------|
| Biphasic insulin lispro             | 24,233 | 27,978 [25,094-30,862] | -13.4 |
| Semaglutide                         | 23,082 | 27,490 [22,956-32,025] | -16   |
| Saxagliptin                         | 14,952 | 16,226 [13,308-19,145] | -7.9  |
| Metformin hydrochloridesitagliptin  | 12,600 | 13,500 [12,015-14,985] | -6.7  |
| Insulin glulisine                   | 7,120  | 8,215 [7,438-8,992]    | -13.3 |
| Urine testing reagents              | 8,197  | 6,086 [5,094-7,079]    | 34.7  |
| Exenatide                           | 7,516  | 8,291 [6,026-10,556]   | -9.3  |
| Glucagon                            | 4,946  | 6,602 [5,547-7,657]    | -25.1 |
| Alogliptinmetformin                 | 6,136  | 7,197 [6,393-8,000]    | -14.7 |
| Linagliptinmetformin                | 4,774  | 5,640 [4,940-6,341]    | -15.4 |
| Empagliflozinmetformin              | 4,854  | 5,641 [5,168-6,115]    | -14   |
| Repaglinide                         | 4,147  | 4,386 [3,919-4,852]    | -5.4  |
| Soluble insulin (Neutral insulin)   | 2,914  | 3,198 [2,777-3,618]    | -8.9  |
| Vildagliptin                        | 3,645  | 3,572 [2,646-4,497]    | 2.1   |
| Dapagliflozinmetformin              | 3,270  | 3,729 [3,400-4,058]    | -12.3 |
| Metformin hydrochloridevildagliptin | 3,352  | 3,549 [3,047-4,051]    | -5.5  |
| Lixisenatide                        | 2,800  | 2,941 [380-5,502]      | -4.8  |
| Glipizide                           | 2,446  | 2,178 [-1,463-5,820]   | 12.3  |
| Acarbose                            | 2,218  | 2,161 [1,695-2,627]    | 2.6   |
| Metformin hydrochloridepioglitazone | 2,021  | 1,808 [390-3,226]      | 11.8  |
| Ins degludecirlaglutide             | 1,862  | 2,183 [1,821-2,545]    | -14.7 |
| Tolbutamide                         | 1,285  | 1,372 [732-2,013]      | -6.4  |
| Canagliflozinmetformin              | 972    | 1,116 [932-1,301]      | -12.9 |
| Saxagliptinmetformin                | 832    | 916 [580-1,252]        | -9.2  |
| Saxagliptindapagliflozin            | 776    | 1,061 [637-1,485]      | -26.9 |
| Nateglinide                         | 454    | 543 [411-674]          | -16.4 |
| Ertugliflozin                       | 390    | 526 [345-708]          | -25.9 |
| Diazoxide                           | 170    | 106 [3-208]            | 60.8  |

|                                           |           |                                 |        |
|-------------------------------------------|-----------|---------------------------------|--------|
| Glibenclamide                             | 83        | 191 [-1,683-2,065]              | -56.6  |
| Empagliflozinlinagliptin                  | 114       | 158 [103-213]                   | -27.8  |
| Insulin glarginelixisenatide              | 59        | 26 [11-42]                      | 123.2  |
| Glucose and ketone blood testing reagents | 6         | 6 [-56-67]                      | 8.8    |
| Insulin human                             | 10        | 13 [-7-33]                      | -24.1  |
| 602 Thyroid and antithyroid drugs         | 2,718,267 | 2,978,615[2,786,710-3,170,520]  | -8.7   |
| Levothyroxine sodium                      | 2,662,426 | 2,919,314 [2,731,097-3,107,531] | -8.8   |
| Carbimazole                               | 47,545    | 51,526 [48,217-54,835]          | -7.7   |
| Liothyronine sodium                       | 4,766     | 4,292 [3,652-4,932]             | 11     |
| Propylthiouracil                          | 3,228     | 3,392 [3,066-3,717]             | -4.8   |
| Levothyroxine sodium and liothyronine     | 302       | 224 [148-300]                   | 34.7   |
| Iodine                                    | 1         | -1 [-8-7]                       | -270.2 |
| 603 Corticosteroids (endocrine)           | 558,839   | 694,073[624,757-763,389]        | -19.5  |
| Prednisolone                              | 485,855   | 614,566 [543,975-685,157]       | -20.9  |
| Dexamethasone                             | 132,489   | 169,013 [143,089-194,936]       | -21.6  |
| Fludrocortisone acetate                   | 44,209    | 48,078 [44,791-51,366]          | -8     |
| Betamethasone sodium phosphate            | 17,509    | 22,210 [15,887-28,532]          | -21.2  |
| Hydrocortisone sodium phosphate           | 883       | 737 [-419-1,893]                | 19.8   |
| Hydrocortisone sodium succinate           | 621       | 920 [336-1,504]                 | -32.5  |
| Dexamethasone phosphate                   | 1,079     | 1,010 [605-1,415]               | 6.9    |
| Deflazacort                               | 387       | 451 [385-518]                   | -14.2  |
| Methylprednisolone                        | 402       | 428 [324-532]                   | -6.1   |
| Dexamethasone sodium phosphate            | 64        | 50 [-119-218]                   | 28.8   |
| Prednisone                                | 4         | -58 [-160-43]                   | -106.9 |
| Methylprednisolone sodium succinate       | 5         | 4 [-10-17]                      | 35.2   |
| Cortisone acetate                         | 6         | 5 [-3-14]                       | 11.2   |
| 604 Sex hormones                          | 671,719   | 799,547[746,714-852,380]        | -16    |
| Finasteride                               | 307,618   | 340,628 [318,376-362,880]       | -9.7   |

|                                                           |         |                           |        |
|-----------------------------------------------------------|---------|---------------------------|--------|
| Estradiol                                                 | 198,797 | 238,998 [219,402-258,594] | -16.8  |
| Estradiol with progestogen                                | 83,504  | 126,334 [106,453-146,215] | -33.9  |
| Progesterone                                              | 28,333  | 32,914 [28,444-37,384]    | -13.9  |
| Norethisterone                                            | 29,785  | 55,106 [45,582-64,629]    | -45.9  |
| Dutasteride                                               | 23,264  | 25,053 [20,922-29,184]    | -7.1   |
| Testosterone                                              | 22,040  | 22,730 [20,050-25,411]    | -3     |
| Tibolone                                                  | 14,797  | 16,930 [15,283-18,577]    | -12.6  |
| Oestrogens conjugated                                     | 13,170  | 15,430 [12,939-17,921]    | -14.6  |
| Estradiol valerate                                        | 11,402  | 7,186 [-4,356-18,727]     | 58.7   |
| Testosterone undecanoate                                  | 10,233  | 12,039 [10,522-13,556]    | -15    |
| Testosterone esters                                       | 3,819   | 4,730 [4,230-5,229]       | -19.3  |
| Raloxifene hydrochloride                                  | 3,711   | 3,912 [3,311-4,512]       | -5.1   |
| Oestrogens conjugated with progestogen                    | 2,324   | 721 [-5,820-7,262]        | 222.4  |
| Estradiol and estriol with progestogen                    | 718     | 745 [415-1,074]           | -3.6   |
| Testosterone enantate                                     | 637     | 665 [431-900]             | -4.3   |
| Prasterone                                                | 120     | 54 [18-89]                | 124.1  |
| Oestrogens conjugated with bazedoxifene                   | 21      | 39 [10-68]                | -45.8  |
| Ethinylestradiol                                          | 27      | -66 [-242-110]            | -140.9 |
| Nandrolone decanoate                                      | 4       | 7 [-9-23]                 | -43.1  |
| Oxandrolone                                               | 4       | 2 [-5-8]                  | 147.7  |
| Dydrogesterone                                            | 2       | 1 [-4-7]                  | 62.8   |
| Testosterone propionate                                   | 1       | 3 [-1-7]                  | -63.1  |
| Mesterolone                                               | 1       | -12 [-122-97]             | -108.1 |
| 605 Hypothalamic and pituitary hormones and antioestrogen | 27,281  | 32,346[29,804-34,887]     | -15.7  |
| Desmopressin acetate                                      | 22,710  | 27,285 [25,251-29,320]    | -16.8  |
| Somatropin                                                | 4,355   | 4,434 [3,865-5,003]       | -1.8   |
| Clomifene citrate                                         | 172     | 208 [99-318]              | -17.5  |
| Choriogonadotropin alfa                                   | 12      | 15 [0-30]                 | -19    |

|                                                |         |                           |         |
|------------------------------------------------|---------|---------------------------|---------|
| Tolvaptan                                      | 12      | 10 [-20-40]               | 20.9    |
| Menotrophin                                    | 6       | 5 [-8-19]                 | 16.3    |
| Tetracosactide                                 | 11      | 17 [-1-36]                | -36.9   |
| Chorionic gonadotrophin                        | 2       | 0 [-65-65]                | -2753.4 |
| 606 Drugs affecting bone metabolism            | 533,361 | 564,637[514,101-615,172]  | -5.5    |
| Alendronic acid                                | 463,729 | 505,252 [461,520-548,983] | -8.2    |
| Risedronate sodium                             | 49,259  | 52,901 [48,590-57,212]    | -6.9    |
| Ibandronic acid                                | 13,442  | 14,279 [12,717-15,841]    | -5.9    |
| Denosumab                                      | 5,511   | 6,440 [5,818-7,062]       | -14.4   |
| Sodium clodronate                              | 844     | 751 [484-1,018]           | 12.4    |
| Alendronic acidcolecalciferol                  | 334     | 373 [160-585]             | -10.4   |
| Strontium ranelate                             | 130     | -352 [-3,694-2,990]       | -136.9  |
| Teriparatide                                   | 70      | 70 [40-99]                | 0.6     |
| Other bisphosphonate and other preparations    | 26      | 18 [-2-37]                | 46.5    |
| Zoledronic acid                                | 9       | 3 [-7-13]                 | 176.5   |
| Calcitonin (Salmon)                            | 6       | 4 [-12-20]                | 49.4    |
| Pamidronate disodium                           | 1       | 0 [-3-3]                  | 6000.9  |
| 607 Other endocrine drugs                      | 7,585   | 8,067[7,505-8,630]        | -6      |
| Cabergoline                                    | 6,322   | 6,487 [6,035-6,938]       | -2.5    |
| Bromocriptine                                  | 835     | 1,001 [844-1,158]         | -16.6   |
| Quinagolide hydrochloride                      | 366     | 369 [295-443]             | -0.8    |
| Danazol                                        | 339     | 412 [335-489]             | -17.7   |
| Metyrapone                                     | 111     | 99 [53-145]               | 11.7    |
| Nafarelin acetate                              | 77      | 69 [42-96]                | 11.7    |
| Buserelin                                      | 10      | 7 [-2-16]                 | 46.5    |
| Cetrorelix                                     | 1       | 0 [-5-5]                  | 833.1   |
| 701 Drugs used in obstetrics                   | 0       | 0[-3-2]                   | -100    |
| 702 Treatment of vaginal and vulval conditions | 192,991 | 228,554[209,366-247,742]  | -15.6   |

|                                                   |           |                                |        |
|---------------------------------------------------|-----------|--------------------------------|--------|
| Clotrimazole                                      | 107,642   | 119,422 [100,799-138,046]      | -9.9   |
| Estriol                                           | 48,616    | 61,058 [56,597-65,519]         | -20.4  |
| Econazole nitrate                                 | 592       | 637 [421-852]                  | -7     |
| Dequalinium chloride                              | 60        | 123 [36-210]                   | -51.3  |
| Ospemifene                                        | 39        | 89 [68-111]                    | -56.4  |
| Fenticonazole nitrate                             | 5         | 9 [-12-31]                     | -44.6  |
| Boric acid                                        | 6         | 2 [-2-6]                       | 203.9  |
| 703 Contraceptives                                | 561,205   | 697,310[638,559-756,061]       | -19.5  |
| Desogestrel                                       | 233,361   | 257,209 [236,081-278,338]      | -9.3   |
| Combined ethinylestradiol 30mcg                   | 190,229   | 248,496 [224,700-272,293]      | -23.4  |
| Medroxyprogesterone acetate                       | 70,721    | 94,951 [87,016-102,886]        | -25.5  |
| Combined ethinylestradiol 20mcg                   | 28,263    | 34,178 [30,405-37,951]         | -17.3  |
| Combined ethinylestradiol 35mcg                   | 16,928    | 23,173 [19,203-27,142]         | -26.9  |
| Levonorgestrel                                    | 9,329     | 21,789 [17,472-26,106]         | -57.2  |
| Etonogestrel                                      | 1,868     | 11,718 [9,900-13,537]          | -84.1  |
| Phased formulations of ethinylestradiol           | 2,442     | 2,779 [1,574-3,984]            | -12.1  |
| Ulipristal acetate (Emergency Contraceptive)      | 2,264     | 3,280 [1,600-4,959]            | -31    |
| Etonogestrelethinylestradiol                      | 1,296     | 1,550 [1,286-1,813]            | -16.4  |
| Estradiol valandestradiol valerate with dienogest | 762       | 893 [770-1,016]                | -14.6  |
| Nonoxinol 9                                       | 82        | 96 [28-164]                    | -14.6  |
| Combined mestranol                                | 96        | 87 [45-128]                    | 10.7   |
| Estradiol and nomegestrol                         | 27        | -187 [-400-25]                 | -114.4 |
| Norethisterone enantate                           | 1         | 1 [-46-47]                     | 39.8   |
| 704 Drugs used for genito-urinary disorders       | 1,646,975 | 1,825,616[1,671,845-1,979,386] | -9.8   |
| Tamsulosin hydrochloride                          | 629,093   | 690,648 [646,279-735,018]      | -8.9   |
| Sildenafil (Erectile Dysfunction)                 | 261,928   | 326,594 [262,462-390,725]      | -19.8  |
| Solifenacin                                       | 196,589   | 209,604 [194,722-224,486]      | -6.2   |
| Mirabegron                                        | 126,459   | 141,504 [129,478-153,530]      | -10.6  |

|                                                        |         |                           |       |
|--------------------------------------------------------|---------|---------------------------|-------|
| Oxybutynin                                             | 114,246 | 125,981 [114,924-137,038] | -9.3  |
| Tolterodine                                            | 97,882  | 113,929 [104,424-123,433] | -14.1 |
| Tadalafil                                              | 62,562  | 71,104 [64,784-77,424]    | -12   |
| Alfuzosin hydrochloride                                | 38,674  | 40,868 [37,307-44,429]    | -5.4  |
| Trospium chloride                                      | 24,236  | 27,402 [24,457-30,347]    | -11.6 |
| Fesoterodine fumarate                                  | 18,443  | 20,124 [18,457-21,792]    | -8.4  |
| Tamsulosin and dutasteride hydrochloride               | 12,424  | 12,806 [9,377-16,234]     | -3    |
| Darifenacin hydrobromide                               | 10,905  | 12,989 [10,586-15,392]    | -16   |
| Alprostadil                                            | 9,232   | 7,886 [5,933-9,839]       | 17.1  |
| Vardenafil                                             | 5,950   | 6,463 [4,744-8,182]       | -7.9  |
| Solifenacintamsulosin                                  | 3,995   | 4,518 [3,365-5,670]       | -11.6 |
| Indoramin                                              | 3,129   | 3,265 [2,639-3,891]       | -4.2  |
| Propiverine hydrochloride                              | 2,427   | 2,602 [2,291-2,913]       | -6.7  |
| Potassium citrate                                      | 1,943   | 1,920 [1,644-2,197]       | 1.2   |
| Flavoxate hydrochloride                                | 1,201   | 1,269 [1,012-1,527]       | -5.4  |
| Avanafil                                               | 741     | 897 [547-1,248]           | -17.4 |
| Phentolamineaviptadil                                  | 412     | 574 [455-693]             | -28.2 |
| Dapoxetine hydrochloride                               | 393     | 560 [414-705]             | -29.8 |
| Sodium citrate                                         | 112     | 120 [57-183]              | -6.9  |
| Chlorhexidine acetate                                  | 94      | 69 [-105-243]             | 36.9  |
| Bethanechol chloride                                   | 58      | 63 [35-92]                | -8.6  |
| Other urological pain preparations                     | 16      | 17 [2-33]                 | -7.1  |
| Distigmine bromide                                     | 3       | 8 [-7-23]                 | -63.3 |
| Lidocaineprilocaine (Premature Ejaculation)            | 4       | 1 [-1-2]                  | 620.7 |
| Yohimbine hydrochloride                                | 1       | 6 [-4-15]                 | -82   |
| 801 Cytotoxic drugs (malignancy and immunosuppression) | 15,459  | 16,535[15,372-17,698]     | -6.5  |
| Hydroxycarbamide                                       | 7,581   | 8,027 [7,416-8,637]       | -5.6  |
| Mercaptopurine                                         | 5,280   | 5,652 [5,073-6,230]       | -6.6  |

|                                                                            |         |                          |        |
|----------------------------------------------------------------------------|---------|--------------------------|--------|
| Calcium folinate                                                           | 232     | 264 [218-310]            | -12.2  |
| Cyclophosphamide                                                           | 13      | 5 [-55-66]               | 137    |
| Tioguanine                                                                 | 4       | 3 [-4-10]                | 43.6   |
| Imatinib mesilate                                                          | 2       | 4 [-10-19]               | -52.4  |
| Everolimus                                                                 | 2       | 1 [-2-3]                 | 266.2  |
| Mitotane                                                                   | 2       | 1 [-4-5]                 | 236    |
| Capecitabine                                                               | 1       | 2 [-1-4]                 | -36.5  |
| Ibrutinib                                                                  | 1       | 1 [-2-3]                 | 88.8   |
| Chlorambucil                                                               | 1       | 5 [-11-22]               | -81.4  |
| Procarbazine hydrochloride                                                 | 2       | 1 [-3-5]                 | 82.3   |
| 802 Drugs affecting the immune response (malignancy and immunosuppression) | 98,505  | 101,160[93,511-108,808]  | -2.6   |
| Azathioprine                                                               | 67,115  | 69,050 [64,049-74,051]   | -2.8   |
| Tacrolimus                                                                 | 23,738  | 24,983 [22,643-27,323]   | -5     |
| Mycophenolate mofetil                                                      | 16,139  | 16,849 [15,593-18,105]   | -4.2   |
| Ciclosporin                                                                | 4,723   | 4,831 [3,475-6,187]      | -2.2   |
| Mycophenolic sodium                                                        | 659     | 723 [530-916]            | -8.9   |
| Sirolimus                                                                  | 491     | 570 [427-713]            | -13.8  |
| Dimethyl fumar                                                             | 11      | 5 [-12-23]               | 108.8  |
| Peginterferon alpha                                                        | 2       | 2 [-19-24]               | -19.7  |
| Fingolimod                                                                 | 1       | 4 [-2-9]                 | -73.4  |
| Lenalidomide                                                               | 1       | 1 [-5-6]                 | 83.3   |
| Interferon beta                                                            | 2       | -1 [-5-3]                | -284.6 |
| Glatiramer acetate                                                         | 3       | 1 [-2-5]                 | 104.2  |
| 803 Sex hormones and antagonists in malignancy                             | 260,712 | 279,465[263,035-295,895] | -6.7   |
| Letrozole                                                                  | 79,251  | 83,926 [79,107-88,745]   | -5.6   |
| Tamoxifen citrate                                                          | 52,548  | 57,891 [53,162-62,620]   | -9.2   |
| Anastrozole                                                                | 46,858  | 49,558 [46,274-52,842]   | -5.4   |
| Bicalutamide                                                               | 19,316  | 19,830 [18,435-21,225]   | -2.6   |

|                                        |           |                                |         |
|----------------------------------------|-----------|--------------------------------|---------|
| Goserelin acetate                      | 18,722    | 20,548 [17,778-23,319]         | -8.9    |
| Leuprorelin acetate                    | 17,110    | 18,746 [16,625-20,868]         | -8.7    |
| Exemestane                             | 11,520    | 12,744 [11,881-13,608]         | -9.6    |
| Triptorelin acetate                    | 6,765     | 3,683 [229-7,138]              | 83.7    |
| Cyproterone acetate                    | 2,491     | 2,588 [2,236-2,940]            | -3.8    |
| Degarelix                              | 1,721     | 1,879 [1,685-2,073]            | -8.4    |
| Triptorelin embonate                   | 1,078     | 991 [784-1,197]                | 8.8     |
| Octreotide acetate                     | 648       | 551 [403-698]                  | 17.7    |
| Megestrol acetate                      | 548       | 365 [-144-873]                 | 50.3    |
| Diethylstilbestrol                     | 429       | 351 [-7-709]                   | 22.1    |
| Lanreotide                             | 368       | 349 [269-430]                  | 5.4     |
| Flutamide                              | 62        | -4 [-277-268]                  | -1550.8 |
| Fulvestrant                            | 43        | 44 [16-73]                     | -2.9    |
| Toremifene citrate                     | 12        | 15 [-2-33]                     | -22.5   |
| Buserelin                              | 10        | 7 [-2-16]                      | 46.5    |
| Enzalutamide                           | 2         | 7 [-4-18]                      | -70.6   |
| 901 Anaemias and other blood disorders | 1,507,127 | 1,712,338[1,591,836-1,832,840] | -12     |
| Folic acid                             | 633,293   | 718,978 [653,344-784,613]      | -11.9   |
| Ferrous fumarate                       | 348,769   | 412,835 [329,902-495,767]      | -15.5   |
| Ferrous sulfate                        | 220,181   | 233,516 [159,024-308,008]      | -5.7    |
| Hydroxocobalamin                       | 140,213   | 237,202 [214,954-259,449]      | -40.9   |
| Cyanocobalamin                         | 125,570   | 89,909 [83,305-96,514]         | 39.7    |
| Ferrous gluconate                      | 22,742    | 25,615 [22,367-28,863]         | -11.2   |
| Sodium feredetate                      | 11,837    | 17,587 [15,074-20,101]         | -32.7   |
| Iron and folic acid                    | 2,056     | 3,096 [2,576-3,615]            | -33.6   |
| Other oral iron preparations           | 1,286     | 1,224 [756-1,691]              | 5.1     |
| Ferric maltol                          | 453       | 554 [459-650]                  | -18.3   |
| Darbepoetin alfa                       | 320       | 230 [-12-471]                  | 39.2    |

|                                          |         |                           |          |
|------------------------------------------|---------|---------------------------|----------|
| Anagrelide hydrochloride                 | 119     | 118 [52-183]              | 1.1      |
| Iron dextran                             | 35      | 40 [-21-102]              | -13.2    |
| Epoetin alfa                             | 64      | 71 [35-107]               | -9.3     |
| Epoetin beta                             | 60      | 33 [-51-116]              | 84.3     |
| Deferasirox                              | 21      | 10 [-15-35]               | 107      |
| Methoxy polyethylene glycol-epoetin beta | 12      | 12 [-6-30]                | 1        |
| Deferiprone                              | 3       | 7 [-19-33]                | -57.6    |
| Filgrastim                               | 14      | 10 [-2-22]                | 40.2     |
| Lenograstim                              | 3       | 0 [-11-11]                | -36214.5 |
| Iron sucrose                             | 3       | 5 [-5-15]                 | -40.6    |
| Eltrombopag                              | 6       | 5 [-7-18]                 | 11.8     |
| Iron carboxymaltose                      | 1       | 0 [-7-7]                  | -466.5   |
| Desferrioxamine mesilate                 | 1       | 1 [-5-7]                  | -24.5    |
| 902 Fluids and electrolytes              | 90,805  | 100,846[87,731-113,961]   | -10      |
| Sodium bicarbonate                       | 39,114  | 43,465 [40,579-46,352]    | -10      |
| Sodium chloride                          | 26,659  | 26,757 [24,192-29,322]    | -0.4     |
| Water for injection                      | 20,375  | 16,037 [13,901-18,173]    | 27.1     |
| Oral rehydration salts                   | 12,306  | 22,838 [11,934-33,742]    | -46.1    |
| Potassium chloride                       | 8,190   | 8,541 [5,869-11,214]      | -4.1     |
| Calcium polystyrene sulfonate            | 125     | 204 [151-258]             | -38.8    |
| Patiromer calcium                        | 25      | 40 [30-51]                | -37.7    |
| Potassium bicarbonate                    | 23      | 79 [33-125]               | -70.8    |
| Sodium polystyrene sulfonate             | 16      | 18 [4-32]                 | -10.8    |
| Ringers                                  | 1       | 0 [-1-1]                  | -6075.9  |
| 904 Oral nutrition                       | 413,189 | 403,971[328,849-479,093]  | 2.3      |
| Enteral nutrition                        | 299,471 | 304,620 [254,531-354,710] | -1.7     |
| Other food for special diet preparations | 65,944  | 70,932 [57,891-83,972]    | -7       |
| Gluten free bread                        | 22,840  | 23,088 [12,867-33,309]    | -1.1     |

|                                               |        |                      |        |
|-----------------------------------------------|--------|----------------------|--------|
| Gluten free mixes                             | 10,289 | 9,126 [5,911-12,340] | 12.7   |
| Low protein mixes                             | 1,534  | 1,551 [1,099-2,002]  | -1.1   |
| Gluten freelow protein bread                  | 1,183  | 974 [725-1,224]      | 21.4   |
| Gluten freelow protein pasta                  | 930    | 759 [636-882]        | 22.5   |
| Low protein pasta                             | 850    | 805 [629-981]        | 5.6    |
| Low protein biscuits                          | 883    | 868 [692-1,043]      | 1.8    |
| Maltodextrin                                  | 541    | 569 [295-842]        | -4.9   |
| Low protein bread                             | 676    | 591 [370-812]        | 14.4   |
| Gluten freelow protein biscuits               | 522    | 340 [146-533]        | 53.6   |
| Low protein meals                             | 434    | 277 [170-383]        | 56.9   |
| Gluten freelow protein mixes                  | 302    | 207 [138-275]        | 46.2   |
| Low protein cakes                             | 191    | 208 [110-307]        | -8.4   |
| Low protein cereals                           | 220    | 267 [198-337]        | -17.7  |
| Gluten freelow protein grainsflours           | 261    | 186 [141-231]        | 40.5   |
| Low protein desserts                          | 242    | 158 [88-228]         | 53.3   |
| Low protein grainsflours                      | 164    | 157 [107-207]        | 4.6    |
| Gluten freewheat free grainsflours            | 154    | 107 [-187-400]       | 44.1   |
| Gluten freelow protein cereals                | 169    | 123 [84-162]         | 37.4   |
| Low protein cooking aids                      | 135    | 93 [55-132]          | 44.9   |
| Low protein snacks                            | 85     | 64 [33-95]           | 32.9   |
| Low protein miscellaneous                     | 66     | 49 [27-70]           | 35.4   |
| Gluten freelow protein drink                  | 20     | 0 [0-0]              | Inf    |
| Gluten free pasta                             | 2      | -207 [-893-479]      | -101   |
| Low protein risotto                           | 15     | 5 [-1-12]            | 178.7  |
| Gluten freewheat free biscuits                | 1      | -1,707 [-4,165-751]  | -100.1 |
| Fructose                                      | 1      | 4 [1-7]              | -73.8  |
| Gluten free wheatfree lowprotein cooking aids | 4      | 2 [-3-7]             | 150.3  |
| Gluten freelow protein cooking aids           | 5      | -4 [-41-33]          | -229.8 |

|                                         |           |                                 |        |
|-----------------------------------------|-----------|---------------------------------|--------|
| Foods for special diets                 | 2         | -2 [-13-8]                      | -182.6 |
| 905 Minerals                            | 76,610    | 81,195 [74,298-88,093]          | -5.6   |
| Calcium carbonate                       | 33,140    | 34,813 [31,962-37,664]          | -4.8   |
| Sodium fluoride                         | 11,029    | 11,424 [9,605-13,243]           | -3.5   |
| Sevelamer                               | 6,289     | 6,767 [5,946-7,588]             | -7.1   |
| Calcium acetate                         | 5,704     | 6,181 [5,468-6,893]             | -7.7   |
| Magnesium aspartate                     | 4,075     | 4,111 [3,629-4,593]             | -0.9   |
| Cinacalcet hydrochloride                | 4,466     | 4,436 [4,016-4,856]             | 0.7    |
| Magnesium glycerophosphate              | 3,684     | 3,653 [2,908-4,397]             | 0.9    |
| Zinc sulfate monohydrate                | 1,917     | 2,107 [1,886-2,329]             | -9     |
| Other phosphate supplement preparations | 1,286     | 1,374 [1,215-1,533]             | -6.4   |
| Other calcium supplement preparations   | 802       | 1,673 [941-2,406]               | -52.1  |
| Zinc sulfate                            | 1,046     | 1,032 [841-1,223]               | 1.4    |
| Lanthanum carbonate                     | 1,080     | 1,181 [981-1,380]               | -8.5   |
| Calcium acetatemagnesium carbonate      | 705       | 773 [637-909]                   | -8.8   |
| Other selenium preparations             | 708       | 712 [537-887]                   | -0.6   |
| Magnesium citrate                       | 603       | 565 [434-696]                   | 6.7    |
| Calcium lactate                         | 186       | 282 [210-354]                   | -34    |
| Calcium gluconate                       | 142       | 125 [65-186]                    | 13.2   |
| Selenium                                | 94        | 87 [47-127]                     | 7.9    |
| Sucroferric oxyhydroxide                | 76        | 104 [65-144]                    | -27.2  |
| Other zinc preparations                 | 81        | 76 [42-111]                     | 6.3    |
| Other magnesium preparations            | 83        | 103 [41-165]                    | -19.3  |
| Magnesium lactate                       | 65        | 45 [25-66]                      | 42.9   |
| Other mineral formulation preparations  | 16        | 7 [0-14]                        | 133.9  |
| Sodium dihydrogen phosphate dihydrate   | 8         | 5 [-12-21]                      | 74.2   |
| Monobasic potassium phosphate           | 3         | 2 [-8-13]                       | 27.5   |
| 906 Vitamins                            | 2,508,357 | 2,744,881 [2,525,626-2,964,137] | -8.6   |

|                                              |           |                                 |       |
|----------------------------------------------|-----------|---------------------------------|-------|
| Colecalciferol                               | 1,936,682 | 2,127,359 [1,949,680-2,305,038] | -9    |
| Thiamine hydrochloride                       | 243,793   | 264,616 [246,987-282,245]       | -7.9  |
| Vitamin B compound                           | 130,727   | 148,441 [131,457-165,425]       | -11.9 |
| Other multivitamin preparations              | 73,349    | 79,455 [68,256-90,654]          | -7.7  |
| Alfacalcidol                                 | 62,964    | 67,838 [62,837-72,839]          | -7.2  |
| Vitamins caps                                | 26,527    | 27,537 [22,290-32,784]          | -3.7  |
| Pyridoxine hydrochloride                     | 8,113     | 8,920 [8,175-9,666]             | -9    |
| Ascorbic acid                                | 6,641     | 6,648 [4,671-8,625]             | -0.1  |
| Ergocalciferol                               | 6,294     | 5,649 [2,407-8,891]             | 11.4  |
| Calcitriol                                   | 4,627     | 5,347 [4,666-6,028]             | -13.5 |
| Vitamin A                                    | 2,686     | 3,072 [2,417-3,728]             | -12.6 |
| Vitamin E                                    | 2,483     | 2,312 [1,689-2,935]             | 7.4   |
| Phytomenadione                               | 1,012     | 1,050 [760-1,340]               | -3.6  |
| Tocopheryl acetate                           | 755       | 728 [572-885]                   | 3.6   |
| Riboflavin                                   | 880       | 833 [719-947]                   | 5.7   |
| Menadiol sodium phosphate                    | 721       | 869 [49-1,690]                  | -17   |
| Cod liver oil                                | 594       | 480 [115-845]                   | 23.8  |
| Nicotinamide                                 | 557       | 586 [479-693]                   | -4.9  |
| Other vitamin B preparations                 | 185       | 162 [108-215]                   | 14.5  |
| Other vitamin A preparations 0906011         | 38        | 55 [9-102]                      | -31.1 |
| Paricalcitol                                 | 46        | 61 [19-103]                     | -24.3 |
| Vitamin B and C injection                    | 40        | 69 [-1-140]                     | -42.3 |
| Other vitamin B compound preparations        | 14        | 142 [-37-321]                   | -90.1 |
| Betacarotene                                 | 10        | 6 [-2-13]                       | 81.6  |
| Tocofersolan                                 | 10        | 6 [-15-26]                      | 77.5  |
| Other vitamin C (Ascorbic acid) preparations | 1         | 2 [-4-9]                        | -57.9 |
| Other pantothenic acid preparations          | 1         | 0 [-4-5]                        | 116.6 |
| 908 Metabolic disorders                      | 433       | 476[347-604]                    | -9    |

|                                                   |           |                                |       |
|---------------------------------------------------|-----------|--------------------------------|-------|
| Levocarnitine                                     | 263       | 286 [201-371]                  | -8    |
| Sodium benzoate                                   | 69        | 71 [34-108]                    | -2.9  |
| Zinc acetate                                      | 56        | 48 [11-84]                     | 17.8  |
| Mercaptamine                                      | 28        | 42 [9-74]                      | -32.8 |
| Betaine anhydrous                                 | 16        | 20 [1-38]                      | -19.4 |
| Sodium phenylbutyrate                             | 8         | 5 [-10-21]                     | 45.5  |
| Trientine dihydrochloride                         | 8         | 7 [-34-47]                     | 23    |
| Cholesterol                                       | 3         | 4 [-1-9]                       | -22.7 |
| Sacrosidase                                       | 1         | -1 [-6-4]                      | -191  |
| 909 Foods                                         | 18,508    | 20,928[18,699-23,156]          | -11.6 |
|                                                   | 18,508    | 20,928 [18,699-23,156]         | -11.6 |
| 910 Compound vitamin/mineral formulations         | 10,042    | 16,907[12,311-21,503]          | -40.6 |
|                                                   | 10,042    | 16,907 [12,311-21,503]         | -40.6 |
| 911 Health supplements                            | 4,570     | 4,042[2,828-5,256]             | 13.1  |
| Other amino acidandnutritional agent preparations | 1,711     | 1,899 [1,682-2,116]            | -9.9  |
| Other enzyme preparations 0911020                 | 1,652     | 1,562 [673-2,451]              | 5.8   |
| Other digestive aid preparations                  | 1,074     | 1,294 [477-2,111]              | -17   |
| Taurine                                           | 133       | 122 [65-180]                   | 8.8   |
| 912 Other health supplements                      | 10,951    | 55,533[27,497-83,569]          | -80.3 |
|                                                   | 10,951    | 55,533 [27,497-83,569]         | -80.3 |
| 1001 Drugs used in rheumatic diseases and gout    | 1,638,888 | 1,896,044[1,715,114-2,076,973] | -13.6 |
| Naproxen                                          | 520,828   | 611,423 [522,019-700,826]      | -14.8 |
| Allopurinol                                       | 497,468   | 539,711 [503,943-575,480]      | -7.8  |
| Ibuprofen                                         | 364,347   | 442,213 [368,899-515,527]      | -17.6 |
| Methotrexate                                      | 169,719   | 179,514 [166,020-193,007]      | -5.5  |
| Hydroxychloroquine sulfate                        | 98,243    | 99,172 [89,770-108,575]        | -0.9  |
| Diclofenac sodium                                 | 45,718    | 206,475 [141,558-271,393]      | -77.9 |
| Colchicine                                        | 43,573    | 45,803 [41,375-50,231]         | -4.9  |

|                                       |        |                        |        |
|---------------------------------------|--------|------------------------|--------|
| Meloxicam                             | 35,404 | 38,728 [29,903-47,553] | -8.6   |
| Etoricoxib                            | 32,520 | 35,543 [32,042-39,043] | -8.5   |
| Piroxicam                             | 30,244 | 32,358 [20,085-44,630] | -6.5   |
| Methylprednisolone acetate            | 10,698 | 52,573 [45,991-59,156] | -79.7  |
| Celecoxib                             | 24,948 | 27,610 [24,661-30,559] | -9.6   |
| Mefenamic acid                        | 17,057 | 16,277 [7,760-24,795]  | 4.8    |
| Triamcinolone acetonide               | 10,829 | 27,620 [24,143-31,097] | -60.8  |
| Leflunomide                           | 14,697 | 15,642 [14,361-16,924] | -6     |
| Febuxostat                            | 13,729 | 16,101 [14,597-17,604] | -14.7  |
| Indometacin                           | 9,069  | 9,548 [7,794-11,303]   | -5     |
| Etodolac                              | 7,401  | 8,063 [6,535-9,592]    | -8.2   |
| Nabumetone                            | 1,998  | 2,519 [2,107-2,931]    | -20.7  |
| Diclofenac potassium                  | 1,079  | 1,098 [318-1,878]      | -1.7   |
| Penicillamine                         | 621    | 665 [533-797]          | -6.6   |
| Aceclofenac                           | 453    | 453 [263-642]          | 0.1    |
| Triamcinolone hexacetonide            | 48     | 473 [336-610]          | -89.9  |
| Ibuprofen lysine                      | 136    | 151 [69-233]           | -9.8   |
| Flurbiprofen                          | 150    | 118 [-59-295]          | 27.1   |
| Sulindac                              | 131    | 151 [108-193]          | -13    |
| Dexketoprofen                         | 75     | 86 [50-122]            | -13.2  |
| Tiaprofenic acid                      | 97     | 93 [56-130]            | 4.8    |
| Probenecid                            | 82     | 63 [16-110]            | 30     |
| Tenoxicam                             | 40     | 3 [-67-74]             | 1062   |
| Benzbromarone                         | 23     | 17 [-9-42]             | 37.7   |
| Glucosamine hydrochloride (Rheumatic) | 23     | -37 [-301-226]         | -161.8 |
| Sodium aurothiomalate                 | 4      | 117 [19-214]           | -96.6  |
| Apremilast                            | 15     | 14 [4-25]              | 4.9    |
| Baricitinib                           | 13     | 16 [8-23]              | -16.5  |

|                                                    |         |                          |        |
|----------------------------------------------------|---------|--------------------------|--------|
| Phenylbutazone                                     | 12      | 15 [2-28]                | -19.2  |
| Sulfinpyrazone                                     | 10      | -60 [-438-317]           | -116.6 |
| Adalimumab                                         | 13      | 6 [-28-40]               | 118.4  |
| Ibuprofen sodium dihydrate                         | 1       | 2 [-14-17]               | -36.8  |
| Tiopronin                                          | 6       | 1 [-9-11]                | 804.4  |
| Etanercept                                         | 10      | 9 [-30-49]               | 5.7    |
| Golimumab                                          | 1       | 4 [-15-24]               | -75.4  |
| 1002 Drugs used in neuromuscular disorders         | 124,876 | 134,941[125,197-144,686] | -7.5   |
| Baclofen                                           | 94,780  | 103,100 [96,110-110,090] | -8.1   |
| Methocarbamol                                      | 12,550  | 13,470 [11,509-15,432]   | -6.8   |
| Tizanidine hydrochloride                           | 8,649   | 9,514 [8,738-10,290]     | -9.1   |
| Pyridostigmine bromide                             | 5,593   | 6,043 [5,596-6,491]      | -7.5   |
| Dantrolene sodium                                  | 3,131   | 3,430 [3,077-3,782]      | -8.7   |
| Dronabinolcannabidiol                              | 116     | 119 [86-152]             | -2.2   |
| Neostigmine bromide                                | 56      | 84 [47-120]              | -33.2  |
| 1003 Soft-tissue disorders and topical pain relief | 513,360 | 603,549[538,295-668,802] | -14.9  |
| Diclofenac diethyl                                 | 152,533 | 91,124 [5,663-176,585]   | 67.4   |
| Benzydamine hydrochloride                          | 28,089  | 45,466 [29,984-60,949]   | -38.2  |
| Piroxicam                                          | 30,244  | 32,358 [20,085-44,630]   | -6.5   |
| Heparinoid                                         | 24,135  | 27,749 [21,167-34,332]   | -13    |
| Diethylamine salicylate                            | 14,489  | 16,037 [9,538-22,537]    | -9.7   |
| Capsaicin                                          | 15,889  | -12,344 [-32,854-8,166]  | -228.7 |
| Ketoprofen                                         | 13,014  | 13,796 [11,279-16,314]   | -5.7   |
| Methyl salicylate                                  | 1,974   | 2,931 [1,090-4,771]      | -32.6  |
| Felbinac                                           | 158     | -1,478 [-9,204-6,248]    | -110.7 |
| Nicotinates                                        | 143     | -262 [-6,990-6,466]      | -154.6 |
| Freeze sprays and gels                             | 105     | -181 [-1,241-879]        | -158   |
| Arnica montana                                     | 23      | 35 [-4-74]               | -34.5  |

|                                                                   |         |                           |        |
|-------------------------------------------------------------------|---------|---------------------------|--------|
| Methyl salicylate/levomenthol                                     | 13      | 16 [2-31]                 | -21    |
| 1103 Anti-infective eye preparations                              | 83,733  | 109,997[86,825-133,169]   | -23.9  |
| Chloramphenicol                                                   | 66,451  | 90,165 [71,079-109,251]   | -26.3  |
| Fusidic acid                                                      | 69,558  | 95,261 [81,762-108,760]   | -27    |
| Gentamicin sulfate                                                | 2,592   | 1,722 [-1,896-5,339]      | 50.6   |
| Ganciclovir                                                       | 998     | 1,481 [325-2,637]         | -32.6  |
| Hydrocort sodiumphos                                              | 613     | 696 [551-841]             | -11.9  |
| Propamide isetionate                                              | 35      | 35 [-3-73]                | 0.2    |
| Dibrompropamide isetionate                                        | 25      | 17 [-16-49]               | 49.2   |
| Cefuroxime sodium                                                 | 9       | 15 [1-29]                 | -39.6  |
| Polihexanide                                                      | 1       | 2 [-5-9]                  | -51.2  |
| 1104 Corticosteroids and other anti-inflammatory eye preparations | 173,875 | 207,138[155,601-258,674]  | -16.1  |
| Dexamethasone                                                     | 132,489 | 169,013 [143,089-194,936] | -21.6  |
| Sodium cromoglicate                                               | 86,264  | 103,625 [64,718-142,532]  | -16.8  |
| Olopatadine                                                       | 17,751  | 17,707 [14,883-20,531]    | 0.2    |
| Prednisolone acetate                                              | 6,363   | 7,115 [4,514-9,716]       | -10.6  |
| Azelastine hydrochloride                                          | 10,754  | 8,761 [6,225-11,297]      | 22.7   |
| Fluorometholone                                                   | 5,524   | 5,224 [3,771-6,676]       | 5.7    |
| Prednisolone sodium phosphate                                     | 4,865   | 6,321 [4,749-7,892]       | -23    |
| Ciclosporin (Eye Anti Inflammatory)                               | 4,795   | 5,690 [5,045-6,336]       | -15.7  |
| Lodoxamide trometamol                                             | 1,824   | 2,006 [1,396-2,617]       | -9.1   |
| Ketotifen fumarate                                                | 1,673   | 1,943 [1,435-2,452]       | -13.9  |
| Loteprednol etabonate                                             | 978     | 666 [-1,020-2,351]        | 46.9   |
| Antazoline                                                        | 1,332   | 1,242 [605-1,879]         | 7.2    |
| Nedocromil sodium                                                 | 124     | -1,284 [-10,518-7,951]    | -109.7 |
| Hamamalis                                                         | 166     | 167 [105-230]             | -0.8   |
| Epinastine hydrochloride                                          | 232     | 234 [146-321]             | -0.7   |
| Naphazoline hydrochloride                                         | 72      | 101 [69-133]              | -28.6  |

|                                 |         |                           |       |
|---------------------------------|---------|---------------------------|-------|
| Flurbiprofen sodium             | 15      | 17 [4-29]                 | -9.2  |
| 1105 Mydriatics and cytoplegics | 5,799   | 5,929[5,306-6,553]        | -2.2  |
| Atropine sulfate                | 4,196   | 4,581 [3,993-5,168]       | -8.4  |
| Cyclopentolate hydrochloride    | 1,475   | 1,414 [1,193-1,636]       | 4.3   |
| Tropicamide                     | 136     | 99 [48-149]               | 37.6  |
| Phenylephrine hydrochloride     | 9       | 17 [-21-55]               | -46.9 |
| 1106 Treatment of glaucoma      | 755,310 | 829,936[774,051-885,821]  | -9    |
| Latanoprost                     | 222,642 | 242,873 [227,218-258,528] | -8.3  |
| Bimatoprost                     | 89,284  | 98,137 [88,890-107,384]   | -9    |
| Timolol and bimatoprost         | 78,872  | 88,259 [80,997-95,521]    | -10.6 |
| Brinzolamide                    | 78,039  | 86,635 [78,462-94,807]    | -9.9  |
| Dorzolamide and timolol         | 59,255  | 64,140 [59,135-69,145]    | -7.6  |
| Timolol                         | 45,529  | 46,637 [39,999-53,275]    | -2.4  |
| Travoprost                      | 30,251  | 32,450 [28,772-36,128]    | -6.8  |
| Dorzolamide                     | 28,322  | 31,668 [29,531-33,804]    | -10.6 |
| Latanoprost and timolol         | 25,908  | 26,979 [24,750-29,209]    | -4    |
| Brimonidine tartrate            | 22,205  | 24,651 [22,184-27,117]    | -9.9  |
| Timolol and travoprost          | 17,316  | 19,167 [17,318-21,015]    | -9.7  |
| Brinzolamide and timolol        | 16,383  | 19,289 [13,714-24,864]    | -15.1 |
| Brinzolamidebrimonidine         | 15,204  | 16,998 [14,493-19,503]    | -10.6 |
| Acetazolamide                   | 7,851   | 7,976 [7,274-8,677]       | -1.6  |
| Tafluprost                      | 6,273   | 6,868 [5,941-7,795]       | -8.7  |
| Timolol and brimonidine         | 4,530   | 4,799 [4,114-5,484]       | -5.6  |
| Pilocarpine hydrochloride       | 4,400   | 4,737 [4,225-5,250]       | -7.1  |
| Tafluprost and timolol          | 2,273   | 2,844 [2,414-3,275]       | -20.1 |
| Betaxolol                       | 1,683   | 1,795 [1,227-2,363]       | -6.2  |
| Levobunolol hydrochloride       | 1,097   | 1,503 [711-2,295]         | -27   |
| Pilocarpine nitrate             | 546     | 517 [313-722]             | 5.5   |

|                                               |         |                           |        |
|-----------------------------------------------|---------|---------------------------|--------|
| 1107 Local anaesthetics (eye)                 | 30      | 44[-38-125]               | -31.5  |
| Oxybuprocaine hydrochloride                   | 7       | 14 [-12-40]               | -49.5  |
| Tetracaine hydrochloride                      | 7       | 4 [-51-58]                | 87.3   |
| Proxymetacaine hydrochloride                  | 15      | 8 [-62-78]                | 80.9   |
| 1108 Miscellaneous ophthalmic preparations    | 319,279 | 334,099[269,127-399,072]  | -4.4   |
| Hypromellose                                  | 144,709 | 158,568 [139,362-177,775] | -8.7   |
| Carbomer 940980                               | 108,269 | 120,022 [95,568-144,477]  | -9.8   |
| Carmellose sodium                             | 41,162  | 45,273 [29,477-61,069]    | -9.1   |
| Liquid paraffin                               | 6,797   | 5,810 [-49,486-61,106]    | 17     |
| Acetylcysteine                                | 6,750   | 7,168 [5,730-8,607]       | -5.8   |
| Ketorolac trometamol                          | 2,762   | 4,152 [3,265-5,038]       | -33.5  |
| Other eye tearlubricantstringent preparations | 2,791   | 3,352 [1,943-4,762]       | -16.7  |
| Apraclonidine                                 | 2,960   | 3,029 [2,476-3,582]       | -2.3   |
| Paraffin soft yellow                          | 2,548   | 1,315 [-3,517-6,146]      | 93.8   |
| Carbomer 974P                                 | 2,456   | 2,667 [1,810-3,524]       | -7.9   |
| Hyetellose                                    | 2,038   | 2,118 [1,839-2,398]       | -3.8   |
| Nepafenac                                     | 1,067   | 1,696 [1,404-1,988]       | -37.1  |
| Carbomer                                      | 1,106   | 1,221 [914-1,528]         | -9.4   |
| Bromfenac                                     | 518     | 804 [553-1,054]           | -35.6  |
| Moxifloxacin hydrochloride                    | 239     | 275 [209-340]             | -13    |
| Fluorescein sodium                            | 31      | 82 [15-148]               | -62    |
| Mercaptamine hydrochloride                    | 11      | 6 [-12-23]                | 93.5   |
| Povidone iodine                               | 2       | 3 [-3-10]                 | -35.3  |
| Idebenone                                     | 3       | 3 [-4-9]                  | 14.2   |
| Polyvinyl alcohol                             | 4       | -1,725 [-8,817-5,366]     | -100.2 |
| 1201 Drugs acting on the ear                  | 114,457 | 136,131[117,319-154,942]  | -15.9  |
| Docusate sodium                               | 191,151 | 213,683 [200,526-226,840] | -10.5  |
| Hydrocortisone acetate                        | 39,009  | 39,203 [16,972-61,434]    | -0.5   |

|                                                        |         |                           |        |
|--------------------------------------------------------|---------|---------------------------|--------|
| Acetic acid                                            | 4,621   | 5,749 [3,575-7,923]       | -19.6  |
| Ciprofloxaindexameth                                   | 4,598   | 5,482 [3,202-7,761]       | -16.1  |
| Dexamethasone sodium metasulphobenzoate                | 2,244   | 3,176 [-26,202-32,554]    | -29.3  |
| Flumetasone pivalate                                   | 1,656   | 72 [-9,885-10,029]        | 2196.4 |
| Urea hydrogen peroxide                                 | 1,739   | 1,977 [1,457-2,498]       | -12.1  |
| Oils for the ear                                       | 95      | -1,090 [-2,035--144]      | -108.7 |
| Ciprofloxacinfluocinolone                              | 111     | 208 [123-293]             | -46.6  |
| Other otitis external preparations                     | 12      | 8 [1-15]                  | 52     |
| Aluminium acetate                                      | 3       | -1 [-12-10]               | -354.1 |
| 1202 Drugs acting on the nose                          | 656,390 | 747,583[670,454-824,712]  | -12.2  |
| Mometasone furoate                                     | 246,364 | 289,054 [258,181-319,926] | -14.8  |
| Fluticasone furoate                                    | 130,152 | 138,014 [115,426-160,603] | -5.7   |
| Fluticasone propionate (Nasal)                         | 74,955  | 88,621 [80,286-96,957]    | -15.4  |
| Neomycin sulfate                                       | 27,540  | 39,059 [30,006-48,113]    | -29.5  |
| Fluticasone propionateazelastine hydrochloride (Nasal) | 28,885  | 33,348 [30,016-36,681]    | -13.4  |
| Sodium chloride                                        | 26,659  | 26,757 [24,192-29,322]    | -0.4   |
| Triamcinolone acetonide                                | 10,829  | 27,620 [24,143-31,097]    | -60.8  |
| Mupirocin                                              | 9,454   | 11,807 [7,439-16,176]     | -19.9  |
| Xylometazoline hydrochloride                           | 1,933   | 2,381 [736-4,025]         | -18.8  |
| Other topical nasal decongestant preparations          | 16      | 16 [-6-38]                | 1.3    |
| Xylometazoline hydrochlorideipratropium bromide        | 1       | 0 [0-0]                   | Inf    |
| Flunisolide                                            | 7       | 2 [-6-9]                  | 321.9  |
| 1203 Drugs acting on the oropharynx                    | 65,890  | 82,268[61,335-103,202]    | -19.9  |
| Benzydamine hydrochloride                              | 28,089  | 45,466 [29,984-60,949]    | -38.2  |
| Chlorhexidine gluconate                                | 27,324  | 30,865 [26,563-35,168]    | -11.5  |
| Miconazole                                             | 13,850  | 13,161 [11,595-14,727]    | 5.2    |
| Pilocarpine hydrochloride                              | 4,400   | 4,737 [4,225-5,250]       | -7.1   |
| Hydrocortisone (Sodium succinate)                      | 3,647   | 4,153 [3,392-4,914]       | -12.2  |

|                                                      |         |                           |         |
|------------------------------------------------------|---------|---------------------------|---------|
| Choline salicylate                                   | 1,361   | 1,214 [775-1,653]         | 12.1    |
| Other treatment of dry mouth preparations            | 631     | 707 [622-792]             | -10.8   |
| Artificial saliva                                    | 558     | -520 [-5,713-4,673]       | -207.2  |
| Benzocaine                                           | 313     | 555 [248-861]             | -43.6   |
| Flubiprofen                                          | 68      | 264 [-126-655]            | -74.3   |
| Dequalinium chloride                                 | 60      | 123 [36-210]              | -51.3   |
| Sodium benzoate                                      | 69      | 71 [34-108]               | -2.9    |
| Other mouth wash, gargle and dentifrice preparations | 50      | 46 [23-69]                | 8.7     |
| Hexetidine                                           | 108     | 271 [-870-1,412]          | -60.2   |
| Amylmetacresol                                       | 21      | 16 [-86-119]              | 29.3    |
| Cetylpyridinium chloride                             | 39      | 31 [0-62]                 | 24      |
| Tetracaine hydrochloride                             | 7       | 4 [-51-58]                | 87.3    |
| Diclofenac sod                                       | 1       | 4 [-28-36]                | -75     |
| Amphotericin                                         | 7       | 9 [-2-20]                 | -23.3   |
| Hexylresorcinol                                      | 5       | 3 [-25-31]                | 70.5    |
| Other oral ulceration and inflammation preparations  | 1       | 2 [-6-11]                 | -56     |
| Dichlorobenzyl alcoholamylmetacresol                 | 1       | 1 [-12-14]                | 43.2    |
| Other lozenge and spray preparations                 | 3       | 3 [-2-8]                  | -2.8    |
| 1301 Management of skin conditions                   | 4,832   | 5,509[4,141-6,877]        | -12.3   |
| Cetomacrogol                                         | 4,755   | 5,529 [4,237-6,820]       | -14     |
| Wool fat                                             | 65      | 29 [-103-161]             | 123.1   |
| Wool fat hydrous                                     | 7       | 10 [-6-26]                | -31.6   |
| Paraffin hard                                        | 2       | 4 [-3-12]                 | -55     |
| Vehicles                                             | 1       | -1 [-16-15]               | -258    |
| Other vehicle and emulsifying agent preparations     | 2       | 0 [-2-2]                  | -3728.9 |
| 1302 Emollient and barrier preparations              | 579,120 | 650,004[526,520-773,488]  | -10.9   |
| Other emollient preparations                         | 399,377 | 444,167 [368,106-520,229] | -10.1   |
| Emollient bath and shower preparations               | 55,570  | 62,790 [43,098-82,482]    | -11.5   |

|                                                   |         |                            |          |
|---------------------------------------------------|---------|----------------------------|----------|
| Light liquid paraffin                             | 38,954  | 46,030 [24,933-67,127]     | -15.4    |
| Urea                                              | 36,982  | 40,831 [35,903-45,758]     | -9.4     |
| Dimeticone (Barrier)                              | 12,627  | 21,087 [14,943-27,231]     | -40.1    |
| Emulsifying wax                                   | 7,752   | 7,589 [3,617-11,561]       | 2.1      |
| Benzalkonium chloride                             | 6,057   | 5,882 [4,480-7,285]        | 3        |
| Other barrier preparations                        | 3,678   | 3,956 [2,978-4,934]        | -7       |
| Wool alcohols                                     | 1,769   | 1,988 [-652-4,627]         | -11      |
| Paraffin soft white                               | 973     | 733 [318-1,149]            | 32.7     |
| Dexpanthenol                                      | 831     | 851 [627-1,076]            | -2.4     |
| Chlohexidine gluconate (Emollient)                | 101     | 0 [-305-305]               | -28269.6 |
| Other dusting powder preparations                 | 1       | -33 [-146-81]              | -103.1   |
| Zinc paste                                        | 1       | -55 [-502-391]             | -101.8   |
| Lactic acid                                       | 1       | 0 [-3-4]                   | 387.5    |
| 1303 Topical local anaesthetics and antipruritics | 20,275  | 23,926[20,288-27,563]      | -15.3    |
| Menthol                                           | 9,456   | 10,477 [9,554-11,400]      | -9.7     |
| Crotamiton                                        | 7,552   | 7,911 [4,386-11,436]       | -4.5     |
| Calamine                                          | 1,878   | 3,838 [1,452-6,223]        | -51.1    |
| Doxepin hydrochloride                             | 204     | -47 [-260-166]             | -537.7   |
| Mepyramine maleate                                | 72      | 27 [-166-220]              | 163.3    |
| 1304 Topical corticosteroids                      | 828,717 | 975,531[870,495-1,080,567] | -15      |
| Betamethasone valerate                            | 236,410 | 268,859 [238,828-298,890]  | -12.1    |
| Clobetasone butyrate                              | 101,255 | 97,657 [31,181-164,133]    | 3.7      |
| Clobetasol propionate                             | 66,329  | 77,710 [71,277-84,143]     | -14.6    |
| Betamethasone esters                              | 27,628  | 32,924 [28,588-37,259]     | -16.1    |
| Fluocinolone acetonide                            | 6,947   | 10,660 [3,085-18,236]      | -34.8    |
| Fludrocortide                                     | 3,301   | 3,678 [-301-7,658]         | -10.3    |
| Hydrocortisone butyrate                           | 2,700   | 3,865 [1,672-6,057]        | -30.1    |
| Fluocinonide                                      | 788     | 915 [562-1,268]            | -13.8    |

|                                                 |         |                          |        |
|-------------------------------------------------|---------|--------------------------|--------|
| Diflucortolone valerate                         | 571     | 1,400 [685-2,115]        | -59.2  |
| Fluticasone propionate (Topical)                | 591     | 624 [37-1,210]           | -5.3   |
| Other topical corticosteroid preparations       | 33      | 39 [15-62]               | -14.9  |
| Alclometasone dipropionate                      | 3       | -255 [-6,497-5,988]      | -101.2 |
| 1305 Preparations fo reczema and psoriasis      | 121,001 | 140,244[129,551-150,936] | -13.7  |
| Calcipotriol                                    | 87,966  | 101,436 [94,053-108,819] | -13.3  |
| Cocois                                          | 6,626   | 7,786 [6,973-8,598]      | -14.9  |
| Tars                                            | 4,502   | 4,985 [4,169-5,801]      | -9.7   |
| Pimecrolimus                                    | 3,454   | 4,551 [3,557-5,546]      | -24.1  |
| Acitretin                                       | 762     | 881 [736-1,026]          | -13.5  |
| Gamolenic acid                                  | 719     | 744 [535-953]            | -3.4   |
| Tacalcitol                                      | 494     | 556 [98-1,014]           | -11.1  |
| Dithranol                                       | 380     | 415 [288-542]            | -8.4   |
| Other psoriasis preparations                    | 334     | 350 [271-429]            | -4.5   |
| Other eczema preparations                       | 34      | 43 [-30-115]             | -20.2  |
| Alitretinoin                                    | 16      | 17 [1-33]                | -6     |
| Tazarotene                                      | 20      | -6 [-130-117]            | -408.5 |
| Ustekinumab (Psoriasis)                         | 4       | 2 [0-5]                  | 85.1   |
| Ichthammol                                      | 5       | 1 [-9-11]                | 440.6  |
| Coal tar bath preparations                      | 1       | -8 [-64-48]              | -112.2 |
| 1306 Acne and rosacea                           | 117,118 | 148,297[130,622-165,971] | -21    |
| Erythromycin                                    | 41,308  | 50,296 [28,228-72,363]   | -17.9  |
| Benzoyl peroxide and clindamycin phosphate      | 38,592  | 46,145 [32,199-60,090]   | -16.4  |
| Adapalene and benzoyl peroxide                  | 14,716  | 19,118 [16,498-21,739]   | -23    |
| Adapalene                                       | 12,200  | 15,163 [13,073-17,253]   | -19.5  |
| Clindamycin phosphate                           | 8,673   | 10,111 [7,472-12,750]    | -14.2  |
| Benzoyl peroxide                                | 8,397   | 11,461 [9,534-13,388]    | -26.7  |
| Co-cyprindiol (Cyprote acetateethinylestradiol) | 5,999   | 7,294 [5,487-9,102]      | -17.8  |

|                                                                   |        |                         |       |
|-------------------------------------------------------------------|--------|-------------------------|-------|
| Azelaic acid                                                      | 5,968  | 8,540 [7,328-9,753]     | -30.1 |
| Ivermectin                                                        | 4,644  | 6,678 [5,910-7,446]     | -30.5 |
| Isotretinoin                                                      | 2,614  | 4,555 [2,652-6,459]     | -42.6 |
| Clindamycintretinoin                                              | 2,315  | 2,479 [1,575-3,383]     | -6.6  |
| Brimonidine tart (Rosacea)                                        | 538    | 1,003 [687-1,319]       | -46.3 |
| Nicotinamide                                                      | 557    | 586 [479-693]           | -4.9  |
| Tretinoin                                                         | 7      | 8 [-7-24]               | -17.2 |
| Sulfur                                                            | 6      | 8 [-3-19]               | -20.8 |
| 1307 Preparations for warts and calluses                          | 8,288  | 12,462[7,873-17,051]    | -33.5 |
| Salicylic acid                                                    | 5,316  | 8,988 [4,736-13,241]    | -40.9 |
| Imiquimod                                                         | 1,965  | 2,275 [1,938-2,611]     | -13.6 |
| Silver nitrate                                                    | 566    | 796 [614-977]           | -28.9 |
| Podophyllotoxin                                                   | 584    | 517 [350-684]           | 12.9  |
| Glutaraldehyde                                                    | 67     | 167 [79-256]            | -59.9 |
| Formaldehyde                                                      | 9      | 15 [-17-47]             | -40.3 |
| Camellia sinensis extract                                         | 13     | 8 [4-13]                | 59.3  |
| 1308 Sunscreens and camouflagers                                  | 25,292 | 41,935[35,717-48,153]   | -39.7 |
| Fluorouracil (Sunscreen)                                          | 9,277  | 15,462 [13,884-17,039]  | -40   |
| Other suncreening preparations                                    | 6,348  | 8,642 [4,436-12,848]    | -26.5 |
| Other camouflage preparations                                     | 2,544  | 3,475 [2,936-4,014]     | -26.8 |
| Ingenol mebutate                                                  | 36     | 2,370 [1,464-3,276]     | -98.5 |
| Titanium dioxide                                                  | 22     | 17 [-39-73]             | 29.4  |
| 1309 Shampoo and other preparations for scalp and hair conditions | 95,591 | 111,416[98,273-124,559] | -14.2 |
| Ketoconazole                                                      | 48,479 | 61,182 [54,572-67,793]  | -20.8 |
| Coal tar                                                          | 42,165 | 47,633 [42,553-52,714]  | -11.5 |
| Benzalkonium chloride                                             | 6,057  | 5,882 [4,480-7,285]     | 3     |
| Selenium sulfide                                                  | 2,497  | 2,045 [-864-4,954]      | 22.1  |
| Eflornithine monohydrate chloride                                 | 1,862  | 2,041 [1,293-2,788]     | -8.7  |

|                                                   |         |                          |        |
|---------------------------------------------------|---------|--------------------------|--------|
| Alkyl sulfate                                     | 140     | 207 [-112-526]           | -32.4  |
| Other shampoo and scalp preparations              | 8       | 6 [-2-14]                | 36.5   |
| 1310 Anti-infective skin preparations             | 216,572 | 283,168[248,975-317,360] | -23.5  |
| Miconazole nitrate                                | 28,205  | 37,201 [31,546-42,857]   | -24.2  |
| Mupirocin                                         | 9,454   | 11,807 [7,439-16,176]    | -19.9  |
| Amorolfine hydrochloride                          | 10,661  | 13,033 [9,966-16,100]    | -18.2  |
| Permethrin                                        | 7,837   | 10,545 [6,963-14,127]    | -25.7  |
| Sodium fusidate                                   | 2,225   | 2,592 [1,835-3,350]      | -14.2  |
| Silver sulfadiazine                               | 2,581   | 1,679 [611-2,748]        | 53.7   |
| Malathion                                         | 1,286   | 309 [-1,834-2,452]       | 316.3  |
| Tioconazole                                       | 1,038   | 1,060 [436-1,684]        | -2.1   |
| Hydrogen peroxide                                 | 722     | 807 [624-991]            | -10.6  |
| Cetrimide                                         | 416     | 297 [-376-969]           | 40.2   |
| Magnesium sulfate                                 | 430     | 487 [329-645]            | -11.7  |
| Dimeticone (Parasitocidal)                        | 372     | -523 [-1,410-364]        | -171.1 |
| Undecenoates                                      | 154     | 188 [94-281]             | -17.9  |
| Penciclovir                                       | 74      | 90 [25-155]              | -17.8  |
| Dibrompropamide isetionate                        | 25      | 17 [-16-49]              | 49.2   |
| Bifonazole                                        | 9       | 15 [-1-30]               | -38.7  |
| Tolnaftate                                        | 7       | 14 [-16-44]              | -50.3  |
| Other antiviral preparations                      | 5       | 16 [0-31]                | -68.1  |
| Polymyxins                                        | 7       | -126 [-1,014-763]        | -105.6 |
| Chlorhex hydrochloride                            | 5       | 7 [-3-16]                | -23.7  |
| Benzyl benzoate                                   | 1       | 2 [-7-12]                | -55.7  |
| Other minor cut and abrasion preparations         | 1       | 14 [-7-35]               | -93    |
| Benzoic acid                                      | 1       | 1 [-13-14]               | 57.3   |
| 1311 Skin cleansers, antiseptics, and desloughing | 15,104  | 18,848[16,675-21,022]    | -19.9  |
| Chlorhexidine gluconate                           | 27,324  | 30,865 [26,563-35,168]   | -11.5  |

|                                          |         |                           |        |
|------------------------------------------|---------|---------------------------|--------|
| Alkyl sulphate                           | 1,738   | 2,175 [1,823-2,526]       | -20.1  |
| Potassium permanganate                   | 749     | 847 [657-1,038]           | -11.6  |
| Iodine compounds                         | 404     | 55 [-506-615]             | 640.7  |
| Alcohol                                  | 158     | 105 [48-161]              | 50.8   |
| Chlorhexidine acetate                    | 94      | 69 [-105-243]             | 36.9   |
| Sodium hypochlorite                      | 33      | 46 [24-68]                | -27.6  |
| Ster larvae                              | 78      | 58 [18-99]                | 33.9   |
| Chloroxylenol                            | 31      | 36 [-1-74]                | -15.1  |
| Halogenated phenols with phenol          | 14      | 7 [-17-31]                | 90.2   |
| Isopropyl alcohol                        | 7       | 4 [-12-19]                | 83.8   |
| Triclosan                                | 8       | -39 [-133-55]             | -120.6 |
| Other alcohol and saline preparations    | 4       | 5 [-1-10]                 | -15.4  |
| 1312 Antiperspirants                     | 2,995   | 4,333[2,980-5,686]        | -30.9  |
| Aluminium chloride                       | 2,967   | 4,327 [2,991-5,663]       | -31.4  |
| Other antiperspirant preparations        | 2       | 2 [-13-17]                | 1.2    |
| 1313 Wound management products           | 1,355   | 1,425[1,080-1,771]        | -4.9   |
|                                          | 1,355   | 1,426 [1,080-1,772]       | -5     |
| 1314 Topical circulatory preparations    | 6,269   | 7,944[6,974-8,913]        | -21.1  |
| 1315 Miscellaneous topical preparations  | 144     | 128[37-219]               | 12.2   |
| Other miscellaneous topical preparations | 78      | 94 [26-162]               | -17.1  |
| Depigmenting agents                      | 66      | 69 [35-103]               | -4.4   |
| 1404 Vaccines and antisera               | 114,107 | 178,442[-610,846-967,730] | -36.1  |
| Influenza                                | 62,984  | 6,480 [-762,891-775,852]  | 871.9  |
| Pneumococcal                             | 28,805  | 35,269 [-97-70,635]       | -18.3  |
| Typhoid                                  | 4,818   | 41,840 [22,002-61,677]    | -88.5  |
| Diphtheria                               | 7,629   | 37,638 [28,984-46,292]    | -79.7  |
| Hepatitis A                              | 3,953   | 33,406 [8,158-58,654]     | -88.2  |
| Hepatitis Atyphoid vaccine               | 1,323   | 19,320 [-1,848-40,488]    | -93.2  |

|                                              |        |                           |        |
|----------------------------------------------|--------|---------------------------|--------|
| Hepatitis B                                  | 3,086  | 7,062 [864-13,260]        | -56.3  |
| Hepatitis Ahepatitis B                       | 794    | 7,459 [-513-15,431]       | -89.4  |
| Meningococcal A + C + W135 + Y vaccine       | 221    | -819 [-11,565-9,926]      | -127   |
| Measles, mumps and rubella vaccine           | 33     | 621 [470-772]             | -94.7  |
| Shingles (HZ)                                | 223    | 384 [-665-1,434]          | -42    |
| Cholera                                      | 25     | 732 [435-1,030]           | -96.6  |
| Meningococcal B vaccine                      | 93     | 630 [-6,749-8,009]        | -85.2  |
| Haemophilus influenzae B meningococcal C     | 38     | 72 [3-140]                | -46.9  |
| Varicella vaccine live                       | 31     | 138 [43-232]              | -77.5  |
| Human papillomavirus (Type 6,11,16,18)       | 35     | 61 [21-101]               | -42.9  |
| Rabies                                       | 9      | 25 [-73-123]              | -64.5  |
| Humpapvirus (Type 6,11,16,18,31,33,45,52,58) | 4      | 22 [14-29]                | -81.5  |
| Rotavirus                                    | 2      | -1 [-33-32]               | -311.3 |
| Human papillomavirus (Type 16,18)            | 1      | 4 [-7-14]                 | -74.2  |
| 1501 General anaesthesia                     | 38,382 | 28,413 [23,819-33,007]    | 35.1   |
| Midazolam hydrochloride                      | 31,731 | 25,974 [21,646-30,302]    | 22.2   |
| Hyoscine hydrobromide                        | 9,388  | 9,006 [4,481-13,532]      | 4.2    |
| Alfentanil hydrochloride                     | 376    | 418 [311-525]             | -10    |
| Fentanyl citrate                             | 52     | 34 [-11-78]               | 55.2   |
| Ketamine                                     | 30     | 47 [23-70]                | -36.1  |
| Parecoxib sodium                             | 13     | 8 [-1-16]                 | 72.6   |
| Nitrous oxide                                | 3      | 3 [-76-83]                | -3.1   |
| 1502 Local anaesthesia                       | 48,024 | 118,650 [105,694-131,605] | -59.5  |
| Lidocaine hydrochloride                      | 44,710 | 112,569 [100,157-124,981] | -60.3  |
| Lidocaine                                    | 4,798  | 5,040 [4,300-5,781]       | -4.8   |
| Tetracaine                                   | 644    | 1,316 [274-2,358]         | -51.1  |
| Bupivacaine hydrochloride                    | 271    | 2,192 [1,763-2,620]       | -87.6  |
| Mepivacaine hydrochloride                    | 26     | 278 [101-454]             | -90.6  |

|                                                           |        |                        |       |
|-----------------------------------------------------------|--------|------------------------|-------|
| Prilocaine hydrochloride                                  | 13     | 22 [-10-55]            | -41.5 |
| Cocaine                                                   | 4      | 3 [-4-11]              | 22.4  |
| Levobupivacaine hydrochloride                             | 4      | 6 [-27-40]             | -38.2 |
| 1901 Alcohol, wines, and spirits                          | 0      | 0[-2-3]                | -100  |
| 1902 Selective preparations                               | 40,906 | 35,467[13,669-57,265]  | 15.3  |
| Other toiletry preparations                               | 24,939 | 28,137 [19,069-37,204] | -11.4 |
| Other individually formulated bought in preparations      | 15,688 | 4,649 [-17,900-27,199] | 237.4 |
| Charcoal                                                  | 133    | 153 [98-207]           | -12.9 |
| Naloxone hydrochloride                                    | 41     | 20 [-97-137]           | 106   |
| Other homeopathic preparations                            | 69     | 97 [-66-260]           | -29   |
| Other household and over the counter preparations         | 5      | 6 [1-11]               | -14.3 |
| 1904 Single substances                                    | 160    | 171[45-298]            | -6.6  |
|                                                           | 160    | 171 [45-298]           | -6.6  |
| 1905 Other preparations                                   | 919    | 1,220[747-1,693]       | -24.7 |
|                                                           | 919    | 1,220 [747-1,693]      | -24.7 |
| 1906 Acids                                                | 467    | 458[127-789]           | 1.9   |
| Other oil preparations                                    | 316    | 300 [26-574]           | 5.3   |
| Other concentrated water preparations                     | 149    | 177 [25-329]           | -15.8 |
| Other tincture preparations                               | 1      | 4 [-6-14]              | -74.5 |
| Other acid preparations                                   | 1      | 1 [-1-4]               | -26.5 |
| 1907 Base/Dil/Susp agents/Stabilisers                     | 44,562 | 48,187[43,599-52,775]  | -7.5  |
|                                                           | 44,562 | 48,187 [43,599-52,775] | -7.5  |
| 1909 Disinfectants, preservatives, and stabilising agents | 1      | 0[-5-6]                | 125.7 |
|                                                           | 1      | 0 [-5-6]               | 125.7 |
| 1913 Cordials/soft drinks                                 | 128    | 249[120-379]           | -48.7 |
|                                                           | 128    | 249 [120-379]          | -48.7 |
| 1914 Waters                                               | 896    | 912[775-1,049]         | -1.8  |
| Other purified water preparations                         | 825    | 809 [702-915]          | 2     |

Sterile water

71

117 [43-191]

-39.4
